# Supplementary material for: Fabrication of a hollow sphere N,S co-doped bifunctional carbon catalyst for sustainable fixation of CO2 to cyclic carbonates
Source: Royal Society of Chemistry journal article supplement (doi:10.1039/d1gc04153c), 2022-01-01
Supplement: d1gc04153c1.pdf [file d1gc04153c1.pdf]

Electronic supplementary information (ESI)

**Fabrication of a hollow sphere N, S co-doped bifunctional carbon catalyst for sustainable fixation of CO<sub>2</sub> to cyclic carbonates**

Anindya Ghosh,<sup>a</sup> G Naresh Reddy,<sup>b</sup> Mohammed Siddhique P. K.,<sup>b</sup> Sauvik Chatterjee,<sup>c</sup> Sudip Bhattacharjee,<sup>c</sup> Rahul Maitra,<sup>b</sup> Sergey E. Lyubimov,<sup>d</sup> Ashot V. Arzumanyan,<sup>d,e</sup> Alexander Naumkin,<sup>d</sup> Asim Bhaumik,<sup>c</sup> and Biswajit Chowdhury<sup>a\*</sup>

<sup>a</sup>*Department of Chemistry, Indian Institute of Technology (Indian School of Mines), Dhanbad, Jharkhand-826004, India.*

<sup>b</sup>*Department of Chemistry, Indian Institute of Technology Bombay, Powai, Mumbai-400076, India.*

<sup>c</sup>*School of Materials Sciences, Indian Association for the Cultivation of Science, Jadavpur, Kolkata-700032, India.*

<sup>d</sup>*A. N. Nesmeyanov Institute of Organoelement Compounds, Russian Academy of Sciences, Vavilov str. 28, Moscow-119991, Russia.*

<sup>e</sup>*Topchiev Institute of Petrochemical Synthesis, Russian Academy of Sciences, 29 Leninsky Prospect, 119991 Moscow, Russian Federation.*

*Corresponding author. Tel.: (+91)-326-2235663; Fax.: (+91)-326-2296563; E-mail: [biswajit72@iitism.ac.in](mailto:biswajit72@iitism.ac.in).*

| <b><u>Section</u></b> | <b><u>Contents</u></b>                                         | <b><u>Page numbers</u></b> |
|-----------------------|----------------------------------------------------------------|----------------------------|
| Section S1            | General reaction procedure                                     | S3                         |
| Section S2            | FTIR of NSC-773 catalyst before carbonization                  | S3                         |
| Section S3            | SEM images of N, S co-doped carbon catalysts                   | S4                         |
| Section S4            | HRTEM analysis                                                 | S4-S5                      |
| Section S5            | XPS analysis of NSC-873 and NSC-973 catalysts                  | S6-S10                     |
| Section S6            | NLDFT pore size distribution of N, S co-doped carbon catalysts | S10                        |
| Section S7            | Elemental analysis                                             | S11                        |
| Section S8            | Catalytic activity study                                       | S11-S14                    |
| Section S9            | GC chromatogram of different reaction mixtures                 | S15-S18                    |
| Section S10           | <sup>1</sup> H NMR spectra of the synthesized carbonates       | S19-S30                    |
| Section S11           | Calculations of conversion and selectivity                     | S31                        |
| Section S12           | FTIR analysis of various cyclic carbonates                     | S32                        |
| Section S13           | Computational details                                          | S33-S82                    |
| Section S14           | References                                                     | S83                        |

## Section S1: General reaction procedure

### Procedure for the scaled-up of CO<sub>2</sub>-epichlorohydrin cycloaddition reaction:

The optimized CO<sub>2</sub>-epichlorohydrin cycloaddition reaction was undertaken treating 110 mmol of epichlorohydrin, 0.913 mmol of TBAI, and 110 mg NSC-773 catalyst in a 50 mL round-bottom flask. Stirring the reaction mixture under CO<sub>2</sub> atmosphere for 24 h at 343 K followed by addition of 11 mL methanol and removal of the catalyst by centrifugal separation. Finally, the reaction mixture was analyzed by gas chromatography (Agilent 7890B), showed ~93 % epichlorohydrin conversion, and 97 % cyclic carbonate (4-chloromethyl-1,3-dioxolan-2-one) selectivity with an isolated yield ~86 %.

## Section S2: FTIR analysis

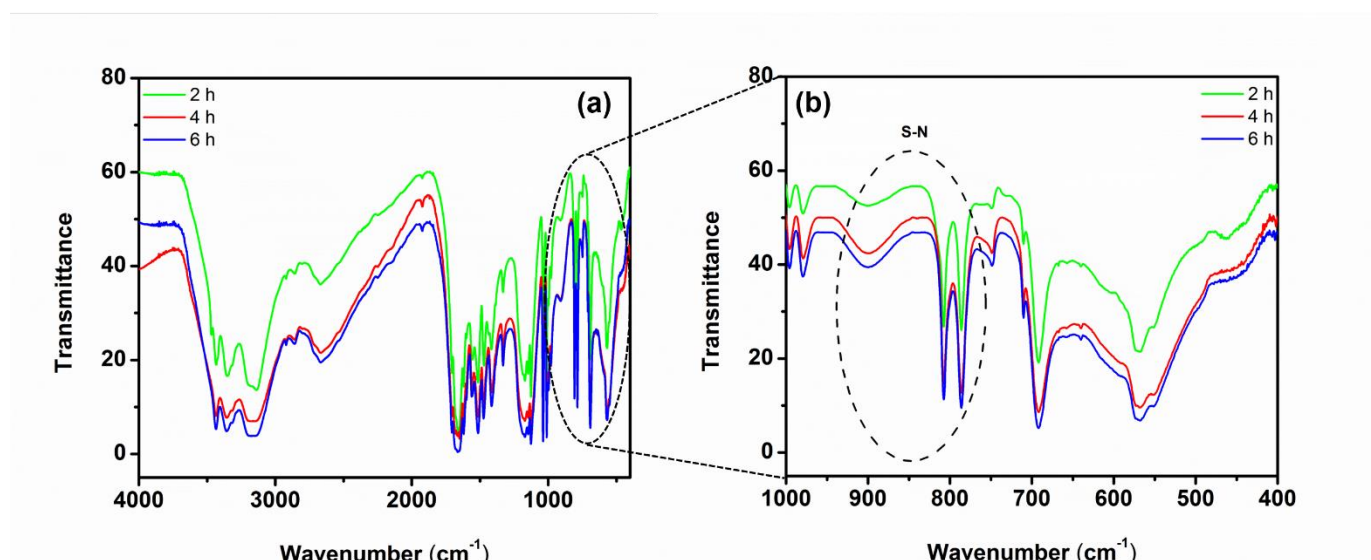

**Fig. S1** FTIR spectra of NSC-773 before carbonization at different time interval (a) and enlarge view of the marked region (b).

### Section S3: SEM analysis

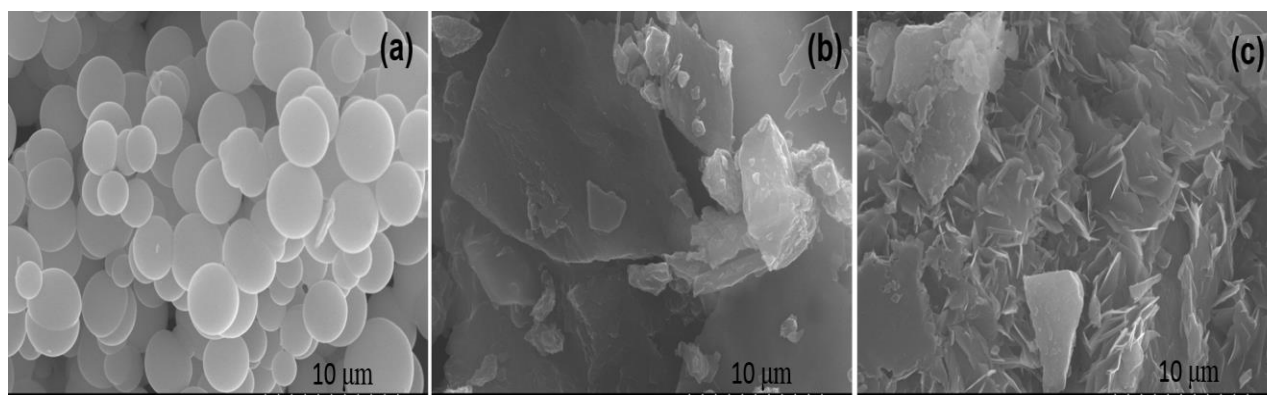

**Fig. S2** SEM images of NSC-773 (a); NSC-873(b) and NSC-973 (c) catalysts.

### Section S4: HRTEM analysis

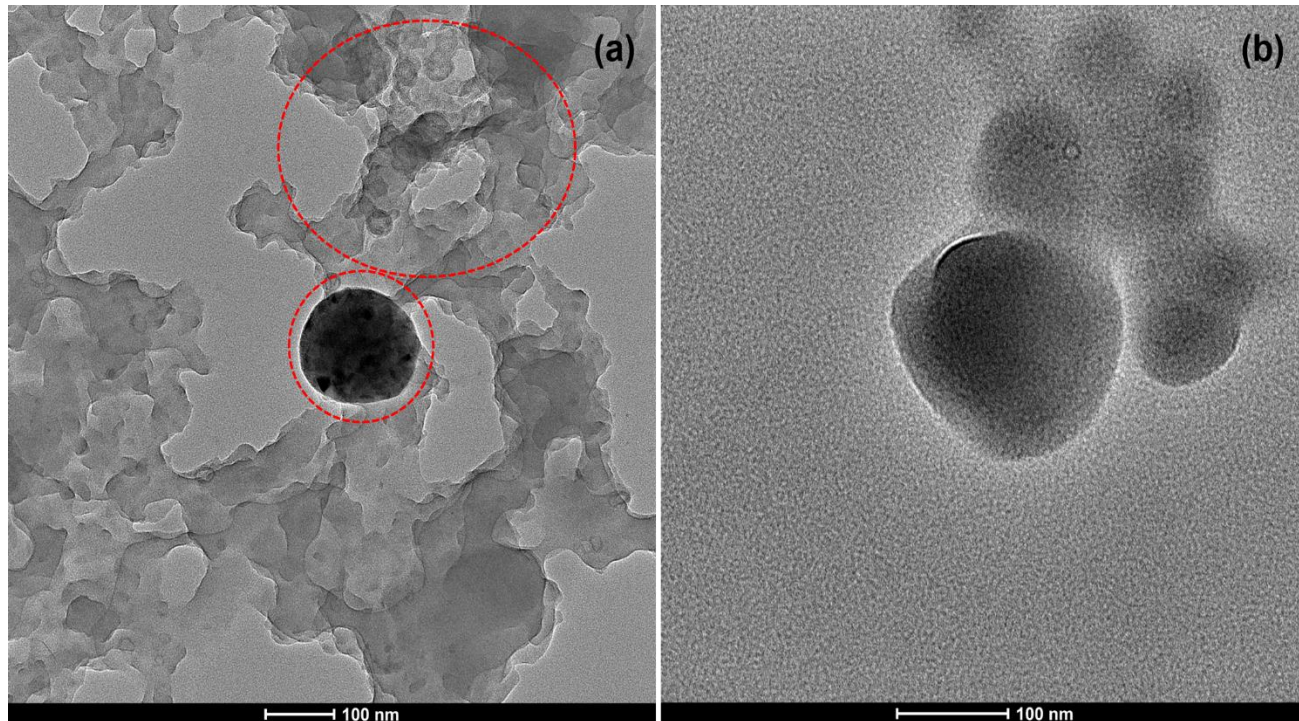

**Fig. S3** Low magnification HRTEM images (a-b) of NSC-773 catalyst.



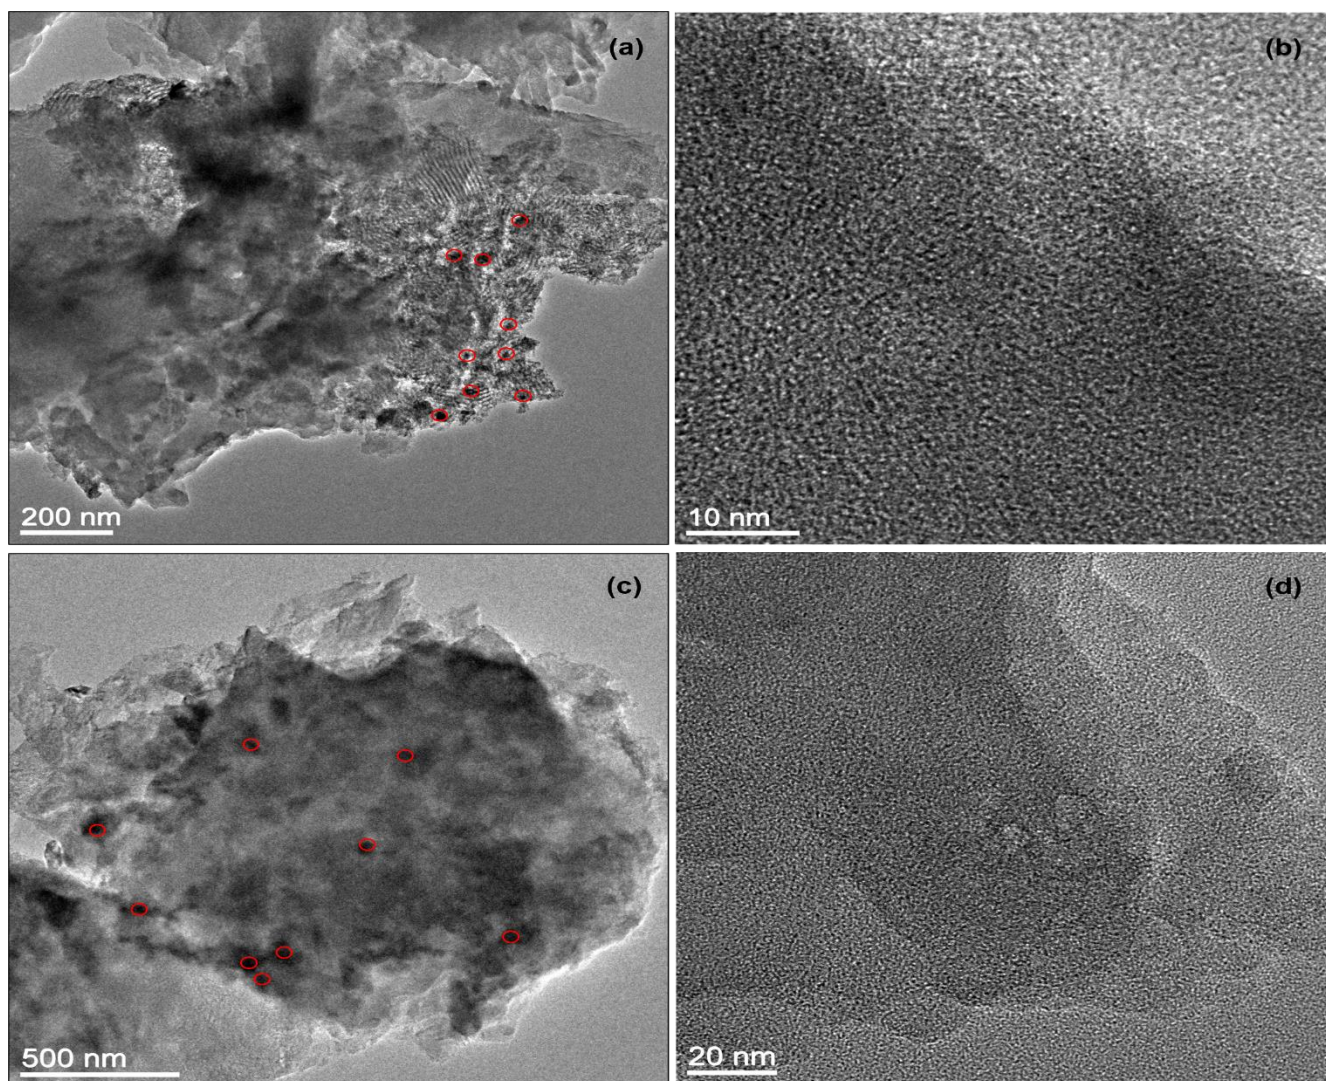

**Fig. S4** HRTEM images of NSC-873 (a and b) and NSC-973 (c and d).

## Section S5: XPS analysis

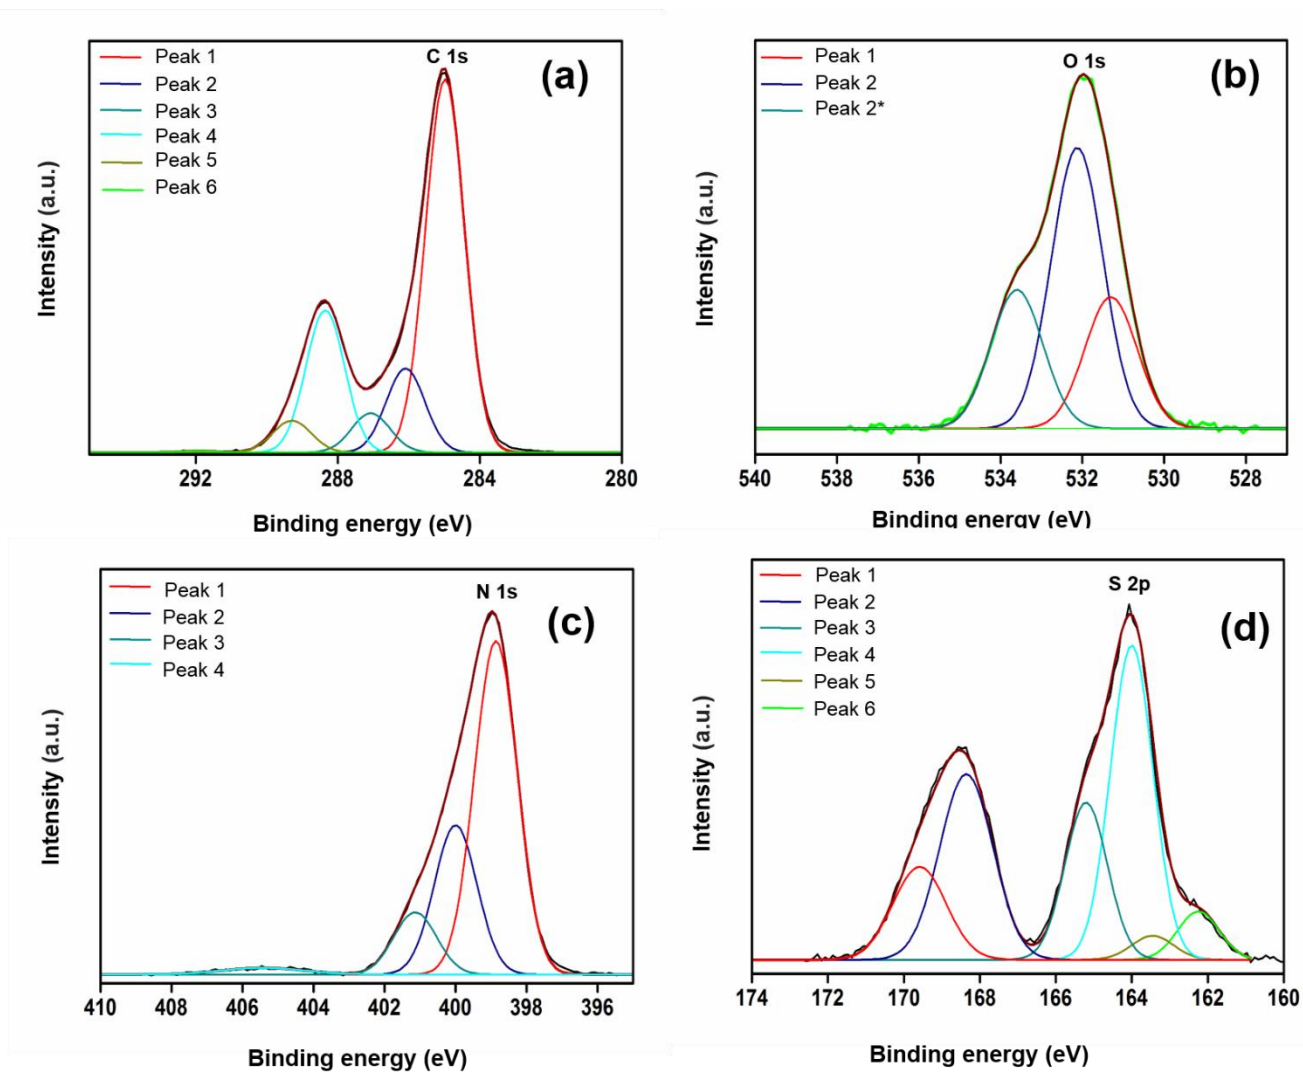

**Fig. S5** XPS high resolution core-level spectra of C 1s (a); O 1s (b); N 1s (c); and S 2p (d) for NSC-873 catalyst.

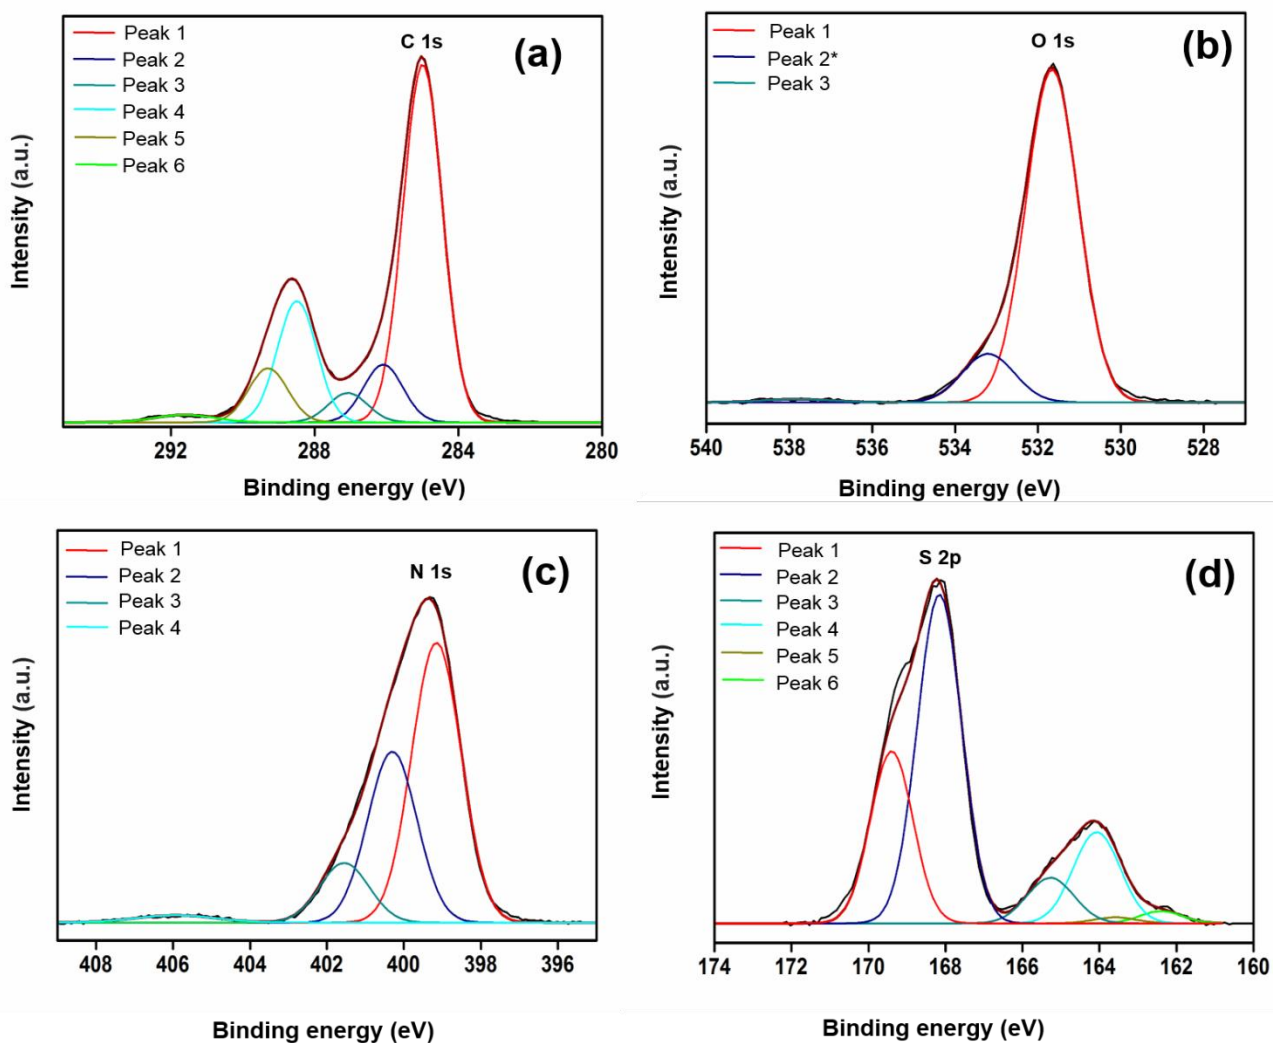

**Fig. S6** XPS high resolution core-level spectra of C 1s (a); O 1s (b); N 1s (c); and S 2p (d) for NSC-973 catalyst.

**Table S1** Binding energies ( $E_b$ ), Gaussian widths ( $W$ ), peak areas ( $P_a$ ), and relative intensities ( $I_{rel}$ ) for the C 1s spectra.

| Catalyst |            | Peak 1 | Peak 2 | Peak 3 | Peak 4 | Peak 5 | Peak 6 |
|----------|------------|--------|--------|--------|--------|--------|--------|
| NSC-773  | $E_b$ , eV | 285.0  | 286.09 | 287.07 | 288.56 | 289.30 | 291.71 |
|          | $W$ , eV   | 1.09   | 1.09   | 1.09   | 1.09   | 1.09   | 1.70   |
|          | $P_a$      | 23093  | 3072   | 1377   | 5466   | 3228   | 832    |
|          | $I_{rel}$  | 0.62   | 0.08   | 0.04   | 0.15   | 0.09   | 0.02   |

|         |                     |       |        |        |        |        |        |
|---------|---------------------|-------|--------|--------|--------|--------|--------|
| NSC-873 | E <sub>b</sub> , eV | 285.0 | 286.11 | 287.09 | 288.36 | 289.30 | 291.92 |
|         | W, eV               | 1.09  | 1.09   | 1.09   | 1.09   | 1.09   | 1.70   |
|         | P <sub>a</sub>      | 26039 | 5857   | 2733   | 9917   | 2219   | 106    |
|         | I <sub>rel</sub>    | 0.56  | 0.12   | 0.06   | 0.21   | 0.05   | 0.002  |
| NSC-973 | E <sub>b</sub> , eV | 285.0 | 286.10 | 287.08 | 288.50 | 289.30 | 291.62 |
|         | W, eV               | 1.09  | 1.09   | 1.09   | 1.09   | 1.09   | 1.70   |
|         | P <sub>a</sub>      | 21719 | 3505   | 1778   | 7353   | 3278   | 700    |
|         | I <sub>rel</sub>    | 0.57  | 0.09   | 0.05   | 0.19   | 0.09   | 0.02   |

**Table S2** Binding energies (E<sub>b</sub>), Gaussian widths (W), peak areas (P<sub>a</sub>), and relative intensities (I<sub>rel</sub>) for the O 1s spectra.

| Catalyst |                     | Peak 1 | Peak 2 | Peak 2* | Peak 3 |
|----------|---------------------|--------|--------|---------|--------|
| NSC-773  | E <sub>b</sub> , eV | 531.71 | -      | 533.32  | 537.85 |
|          | W, eV               | 1.28   | -      | 1.28    | 1.63   |
|          | P <sub>a</sub>      | 26436  | -      | 3646    | 412    |
|          | I <sub>rel</sub>    | 0.87   | -      | 0.12    | 0.01   |
| NSC-873  | E <sub>b</sub> , eV | 531.30 | 532.12 | 533.6   | -      |
|          | W, eV               | 1.28   | 1.26   | 1.28    | -      |
|          | P <sub>a</sub>      | 9779   | 20618  | 10325   | -      |
|          | I <sub>rel</sub>    | 0.24   | 0.51   | 0.25    | -      |
| NSC-973  | E <sub>b</sub> , eV | 531.66 | -      | 533.20  | 537.81 |
|          | W, eV               | 1.26   | -      | 1.26    | 1.65   |
|          | P <sub>a</sub>      | 21664  | -      | 3154    | 271    |
|          | I <sub>rel</sub>    | 0.86   | -      | 0.13    | 0.01   |



**Table S3** Binding energies ( $E_b$ ), Gaussian widths ( $W$ ), peak areas ( $P_a$ ), and relative intensities ( $I_{rel}$ ) for the N 1s spectra.

| <b>Catalyst</b> |            | <b>Peak 1</b> | <b>Peak 2</b> | <b>Peak 3</b> | <b>Peak 4</b> |
|-----------------|------------|---------------|---------------|---------------|---------------|
| NSC-773         | $E_b$ , eV | 399.28        | 400.42        | 401.67        | 406.00        |
|                 | $W$ , eV   | 1.32          | 1.30          | 1.30          | 1.81          |
|                 | $P_a$      | 17606         | 10092         | 4110          | 571           |
|                 | $I_{rel}$  | 0.54          | 0.31          | 0.13          | 0.02          |
| NSC-873         | $E_b$ , eV | 398.86        | 400.00        | 401.13        | 405.41        |
|                 | $W$ , eV   | 1.2           | 1.2           | 1.2           | 2.3           |
|                 | $P_a$      | 22986         | 10250         | 4269          | 880           |
|                 | $I_{rel}$  | 0.60          | 0.27          | 0.11          | 0.02          |
| NSC-973         | $E_b$ , eV | 399.16        | 400.30        | 401.55        | 405.94        |
|                 | $W$ , eV   | 1.28          | 1.28          | 1.28          | 2.10          |
|                 | $P_a$      | 20049         | 12240         | 4266          | 845           |
|                 | $I_{rel}$  | 0.54          | 0.33          | 0.11          | 0.02          |

**Table S4** Binding energies ( $E_b$ ), Gaussian widths ( $W$ ), peak areas ( $P_a$ ), and relative intensities ( $I_{rel}$ ) for the S 2p spectra fitted with three spin-orbit doublets.

| <b>Catalyst</b> |            | <b>Peak 6</b> | <b>Peak 5</b> | <b>Peak 4</b> | <b>Peak 3</b> | <b>Peak 2</b> | <b>Peak 1</b> |
|-----------------|------------|---------------|---------------|---------------|---------------|---------------|---------------|
| NSC-773         | $E_b$ , eV | 161.9         | 163.1         | 164.04        | 165.29        | 168.19        | 169.43        |
|                 | $W$ , eV   | 1.1           | 1.1           | 1.22          | 1.22          | 1.14          | 1.1           |
|                 | $P_a$      | 90            | 45            | 780           | 390           | 4150          | 2200          |
|                 | $I_{rel}$  | 0.012         | 0.006         | 0.102         | 0.051         | 0.542         | 0.287         |
| NSC-873         | $E_b$ , eV | 162.25        | 163.45        | 164.00        | 165.20        | 168.36        | 169.59        |
|                 | $W$ , eV   | 1.1           | 1.1           | 1.12          | 1.12          | 1.40          | 1.40          |
|                 | $P_a$      | 240           | 120           | 1600          | 800           | 1180          | 590           |

|         |            |        |        |        |        |        |        |
|---------|------------|--------|--------|--------|--------|--------|--------|
|         | $I_{rel}$  | 0.053  | 0.026  | 0.353  | 0.177  | 0.261  | 0.130  |
| NSC-973 | $E_b$ , eV | 162.43 | 162.63 | 164.03 | 165.23 | 168.13 | 169.43 |
|         | $W$ , eV   | 1.1    | 1.1    | 1.22   | 1.22   | 1.14   | 1.1    |
|         | $P_a$      | 1200   | 60     | 1000   | 500    | 3400   | 1700   |
|         | $I_{rel}$  | 0.143  | 0.007  | 0.119  | 0.060  | 0.405  | 0.202  |

**Table S5** Relative atomic concentration (%) from the high-resolution core-level spectra.

| Catalyst | N 1s (at. %) | O 1s (at. %) | S 2p (at. %) |
|----------|--------------|--------------|--------------|
| NSC-773  | 26.3         | 15.2         | 4.4          |
| NSC-873  | 26.7         | 8.3          | 2.7          |
| NSC-973  | 29.5         | 12.4         | 3.9          |

### Section S6: Micropore size distribution

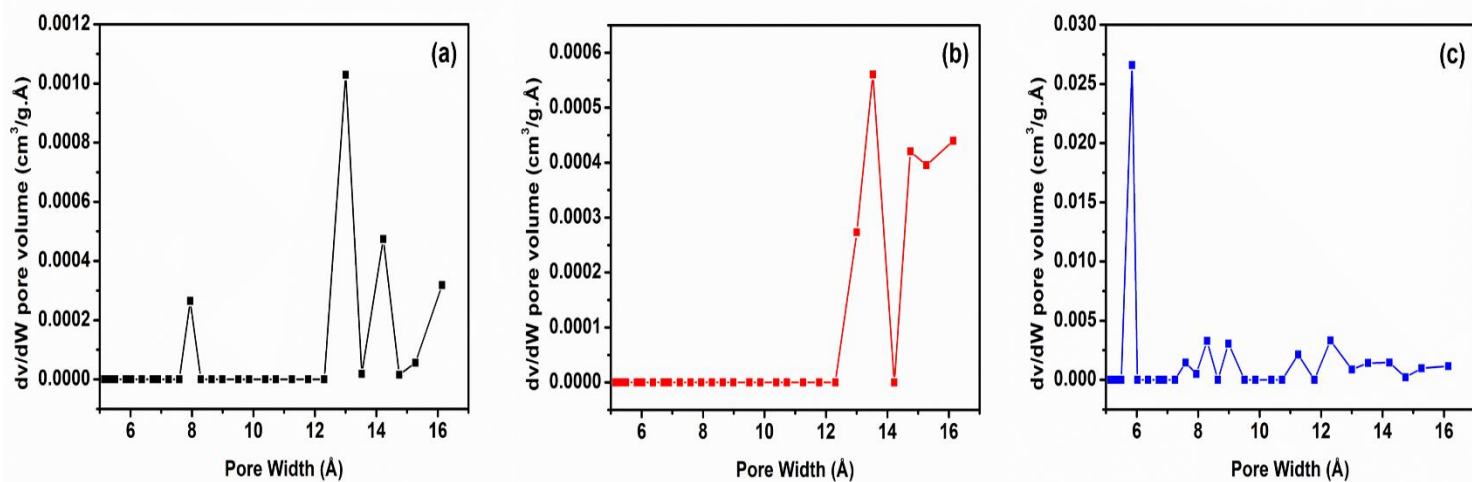

**Fig. S7** NLDFT pore size distributions of NSC-773(a); NSC-873 (b) and NSC-973 (c) catalysts obtained from  $\text{CO}_2$  adsorption.

## Section S7: Elemental analysis

**Table S6** Elemental composition (mass %) of the catalysts

| Catalyst     | C (%) <sup>a</sup> | N (%) <sup>a</sup> | S (%) <sup>a</sup> | H (%) <sup>a</sup> |
|--------------|--------------------|--------------------|--------------------|--------------------|
| NSC-773      | 50.8               | 33.3               | 5.7                | 2.2                |
| NSC-873      | 52.2               | 29.5               | 5.8                | 2.1                |
| NSC-973      | 52.5               | 25.9               | 7.3                | 2.0                |
| Raw material | 37.8               | 26.7               | 9.3                | 5.1                |

<sup>a</sup> The contents of C, N, S are determined by CHNS.

## Section S8: Catalytic activity study

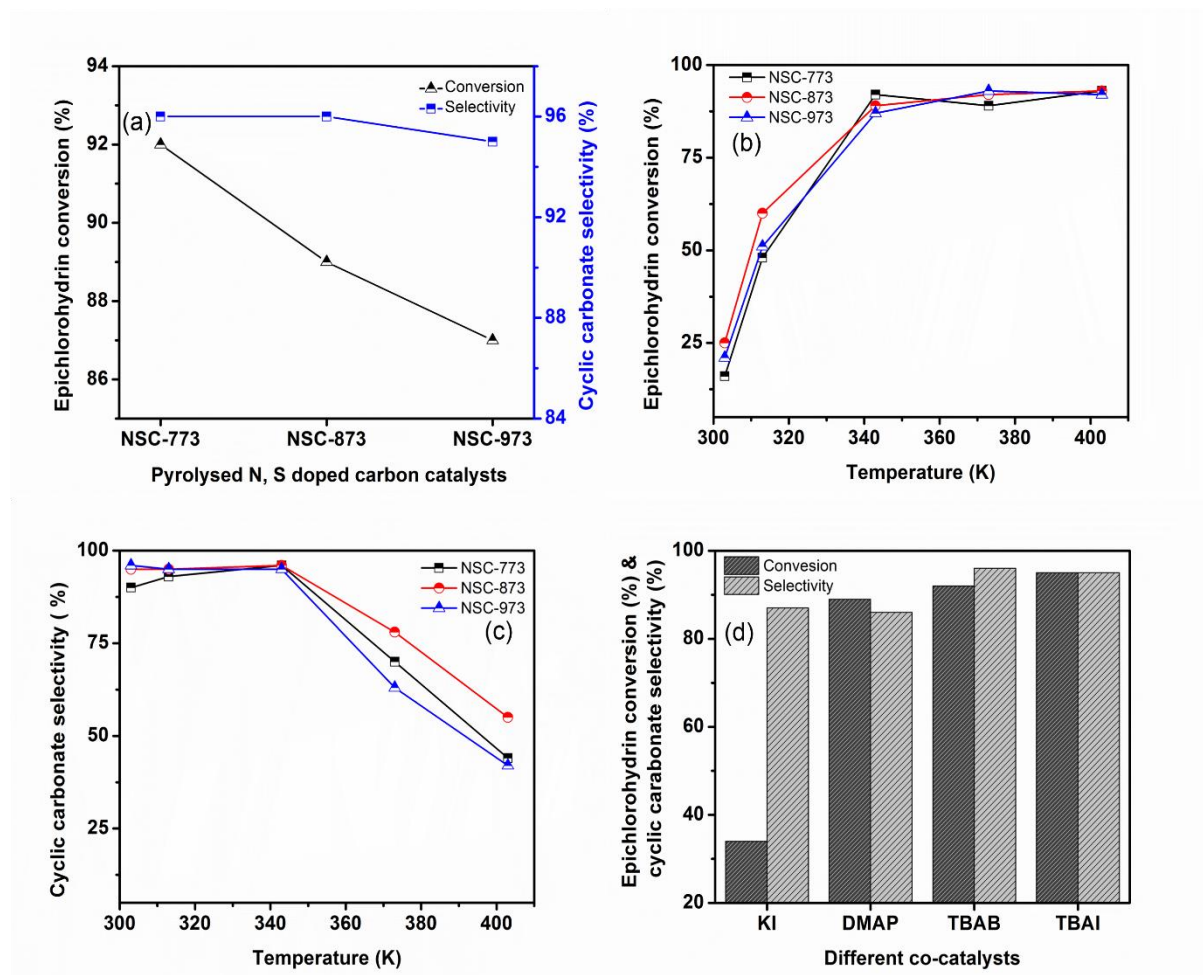

**Fig. S8** Cycloaddition reaction of CO<sub>2</sub> with epichlorohydrin over different N, S doped carbon catalyst (a), reaction conditions: epichlorohydrin: 10 mmol, co-catalyst: TBAB (0.083 mmol),

CO<sub>2</sub> gas bladder, catalyst amount: 50 mg, reaction temperature: 343 K, TOS: 24 h; Effect of reaction temperature on epichlorohydrin conversion (b); and cyclic carbonate selectivity (c); reaction conditions: epichlorohydrin: 10 mmol, co-catalyst: TBAB (0.083 mmol), CO<sub>2</sub> gas bladder, catalyst: NSC-773 (50 mg), TOS: 24 h; Effect of different co-catalysts (d), reaction conditions: epichlorohydrin: 10 mmol, co-catalyst: 0.083 mmol, CO<sub>2</sub> gas bladder, catalyst: NSC-773 (50 mg), reaction temperature: 343 K, TOS: 24 h. (The solid lines shall guide the eye).

**Table S7** Literature reports for the utilization of co-catalyst for CO<sub>2</sub>-epoxide cycloaddition reaction.

| Sr. No | Catalyst                         | Co-catalyst | Temperature (K) | Pressure (bar) | Conversion of epoxide (%) | Selectivity of corresponding carbonate (%) | Ref.     |
|--------|----------------------------------|-------------|-----------------|----------------|---------------------------|--------------------------------------------|----------|
| 1      | -                                | TBAI        | 353             | 20             | 9                         | 50                                         | 47       |
|        | CuCo <sub>2</sub> O <sub>4</sub> | TBAI        | 353             | 20             | 94                        | 94                                         |          |
| 2      | -                                | TBAB        | RT              | 1 atm          | 1                         | -                                          | 49       |
|        | ZnMOF-2                          | TBAB        | 313             | 10             | 99                        | 99                                         |          |
| 3      | -                                | TBAI        | 353             | 10             | 31                        | 99                                         | 54       |
|        | ZrO <sub>2</sub> -MCM-41         | TBAI        | 353             | 10             | 97                        | 99                                         |          |
| 4      | -                                | TBAI        | 343             | 1 atm          | ~1                        | 69                                         | Our work |
|        | NSC-773                          | TBAI        | 343             | 1 atm          | 95                        | 98                                         |          |

**Table S8** Comparison of CO<sub>2</sub> cycloaddition reaction with previously reported carbon-based catalysts

| Entry | Catalyst                                              | Epichlorohydrin<br>(mmol) | Catalyst<br>amount<br>(mg) | Co-catalyst<br>(mmol) | Solvent | Temperature<br>(K) | Pressure<br>(MPa) | TOS<br>(h) | Conversion<br>(%) | Selectivity<br>(%) | Yield<br>(%) | Ref |
|-------|-------------------------------------------------------|---------------------------|----------------------------|-----------------------|---------|--------------------|-------------------|------------|-------------------|--------------------|--------------|-----|
| 1     | ZnBr <sub>2</sub> /g-C <sub>3</sub> N <sub>4</sub>    | 102                       | 200                        | -                     | DMF     | 413                | 2                 | 6          | 88                | 94                 | 92           | 1   |
| 2     | BiCl <sub>3</sub> @Bi@g-C <sub>3</sub> N <sub>4</sub> | 63                        | 10                         | -                     | DMF     | 423                | 2                 | 4          | 100               | >99                | >99          | 2   |
| 3     | ZIF-8/C <sub>3</sub> N <sub>4</sub>                   | 4.5                       | 46                         | -                     | -       | 353                | 1.0               | 24         | 100               | 100                | 100          | 3   |
| 4     | u-C <sub>3</sub> N <sub>4</sub>                       | 255                       | 120                        | -                     | -       | 393                | 2.0               | 5          | 98.3              | 98                 | 96.3         | 4   |
| 5     | MWCNTs-<br>ammonium salt                              | 214                       | 770                        | -                     | -       | 383                | 2                 | 6          | 86                | 94                 | 81           | 5   |
| 6     | ZnTPy-<br>BIM4/CNT                                    | 6.63                      | -                          | -                     | -       | 393                | 1.5               |            | 98                | -                  | -            | 6   |
| 7     | GO-DMEDA-I                                            | 28.6                      | 100                        | -                     | -       | 393                | 2                 | 3          | 95.8              | 94.5               | 98.6         | 7   |



|    |                                      |      |     |                 |   |     |     |    |      |      |      |                         |
|----|--------------------------------------|------|-----|-----------------|---|-----|-----|----|------|------|------|-------------------------|
| 8  | GO-H-Me                              | 28.6 | 120 | -               | - | 363 | 2   | 4  | 93.8 | 99.2 | 93   | 8                       |
| 9  | u-g-C <sub>3</sub> N <sub>4</sub>    | 21.5 | 100 | -               | - | 403 | 2   | 24 | 99.6 | 96.4 | 96   | 9                       |
| 10 | GO-[SmIm]Br                          | 191  | 600 | -               | - | 413 | 2   | 4  | 94.7 | 99.5 | 94.2 | 10                      |
| 11 | CoPc/g-C <sub>3</sub> N <sub>4</sub> | 40   | 200 | -               | - | 403 | 3   | 24 | -    | -    | 97.6 | 11                      |
| 12 | C <sub>60</sub> -fullerenol          | 100  | 100 | KI (1)          | - | 393 | 2.0 | 8  | -    | -    | 99   | 12                      |
| 13 | AP-GO                                | 10   | 30  | TBAI (0.1)      | - | 373 | 0.1 | 27 | -    | -    | 75   | 13                      |
| 14 | NSC-773                              | 10   | 10  | TBAI<br>(0.083) | - | 343 | 0.1 | 24 | 95   | 98   | 93   | Our<br>cat<br>aly<br>st |

### Section S9: GC chromatogram of different reaction mixtures

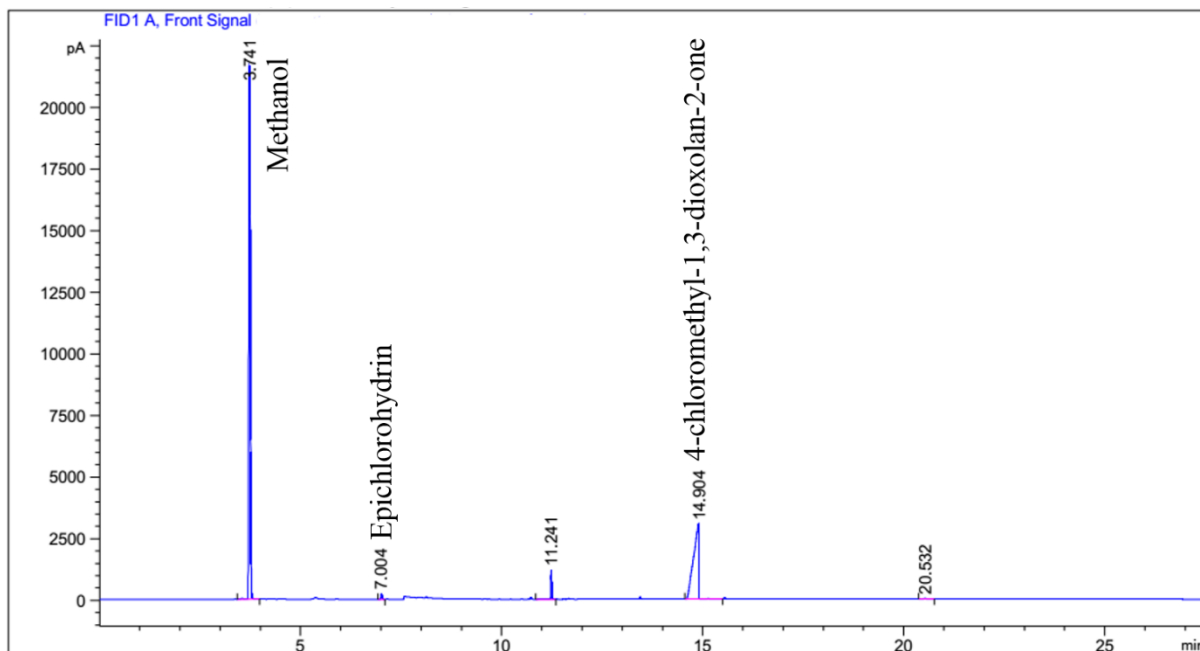

**Fig. S9** GC chromatogram of CO<sub>2</sub>-epichlorohydrin reaction mixture. Injection amount : 1 μL. GC program: Set point (Initial): 60 °C, Hold time (Initial): 4 min, Ramp: 20 °C/min, Set point (Final): 230 °C, Hold time (Final): 13.5 min. FID temperature 280 °C, Split ratio: 50:1.

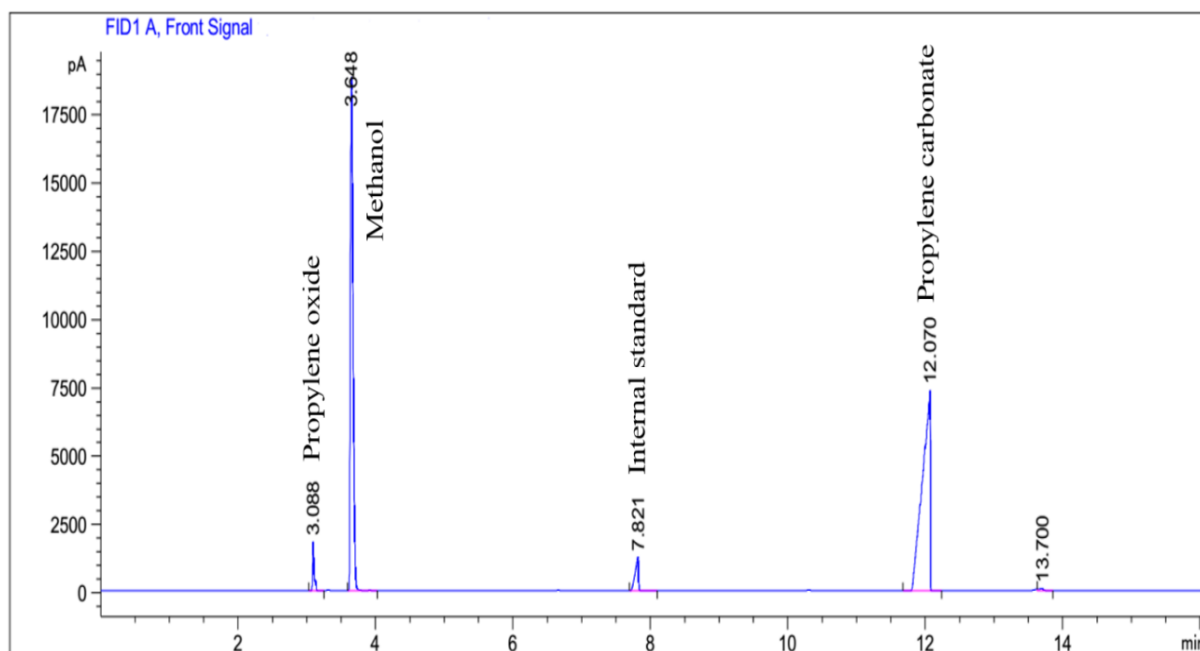

**Fig. S10** GC chromatogram of CO<sub>2</sub>-propylene oxide reaction mixture. Injection amount :1 μL. GC program: Set point (Initial): 60 °C, Hold time (Initial): 4 min, Ramp: 20 °C/min, Set point (Final): 230 °C, Hold time (Final): 3.5 min, FID temperature 280 °C, Split ratio: 50:1.

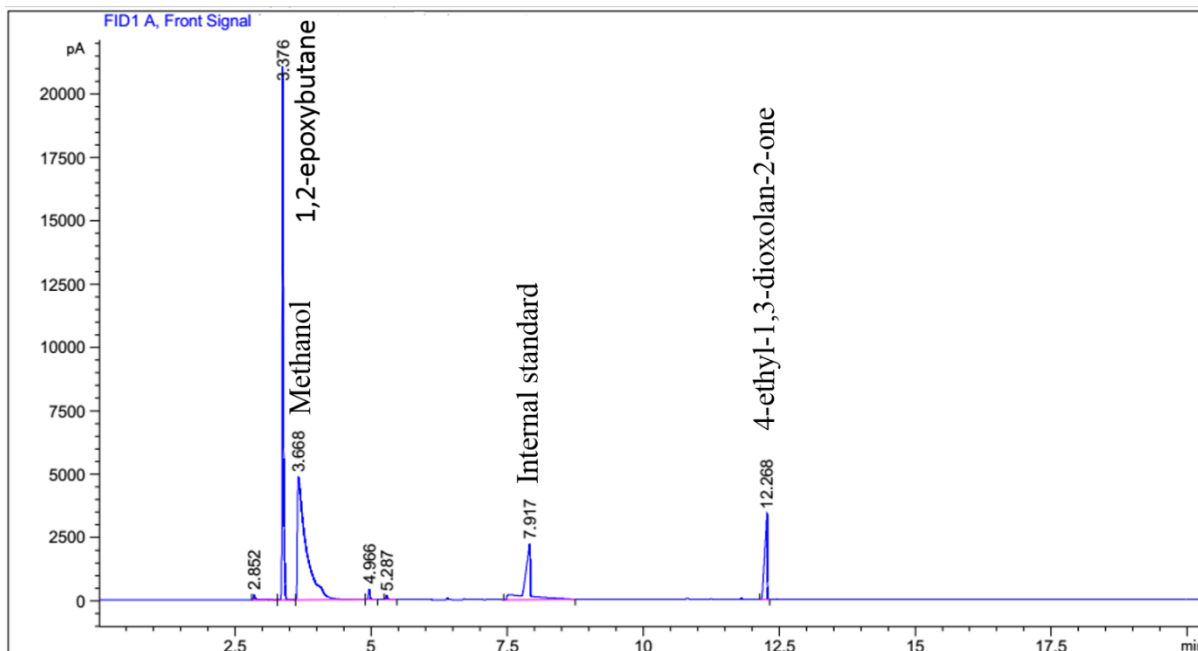

**Fig. S11** GC chromatogram of CO<sub>2</sub>-1, 2-epoxybutane reaction mixture. Injection amount :1 μL. GC program: Set point (Initial): 60 °C, Hold time (Initial): 4 min, Ramp: 20 °C/min, Set point (Final): 230 °C, Hold time (Final): 5.5 min, FID temperature 250 °C, Split ratio: 50:1.

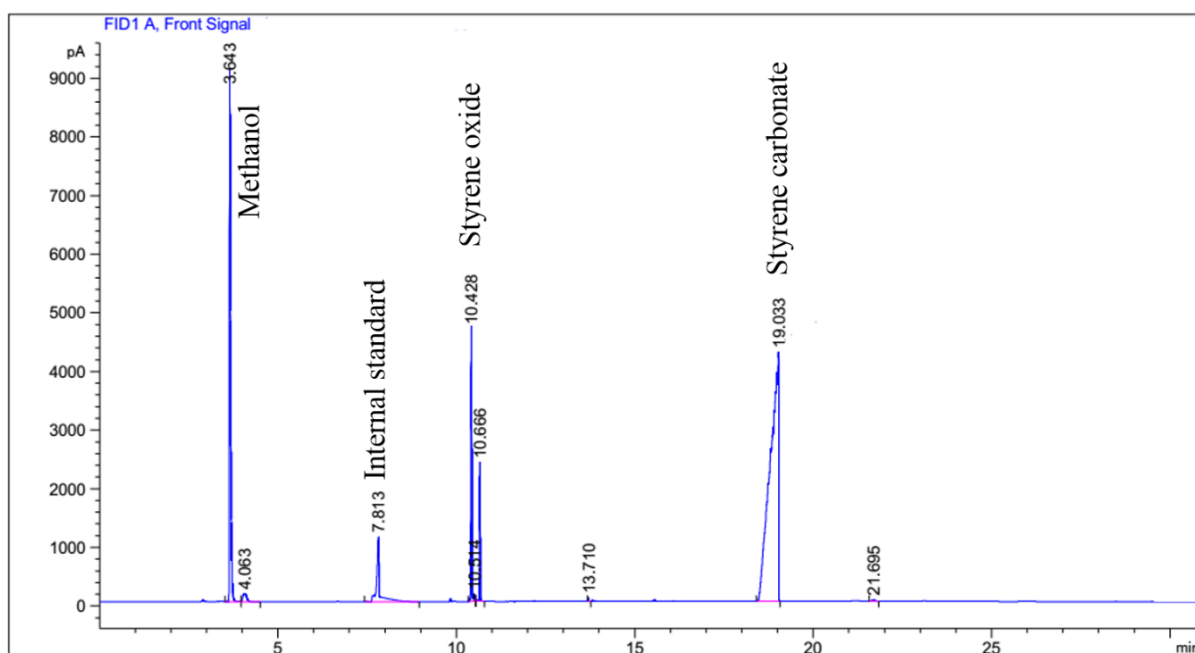

**Fig. S12** GC chromatogram of CO<sub>2</sub>-styrene oxide reaction mixture. Injection amount :1 μL. GC program: Set point (Initial): 60 °C, Hold time (Initial): 4 min, Ramp: 20 °C/min, Set point (Final): 230 °C, Hold time (Final): 17.5 min, FID temperature 280 °C, Split ratio: 80:1.

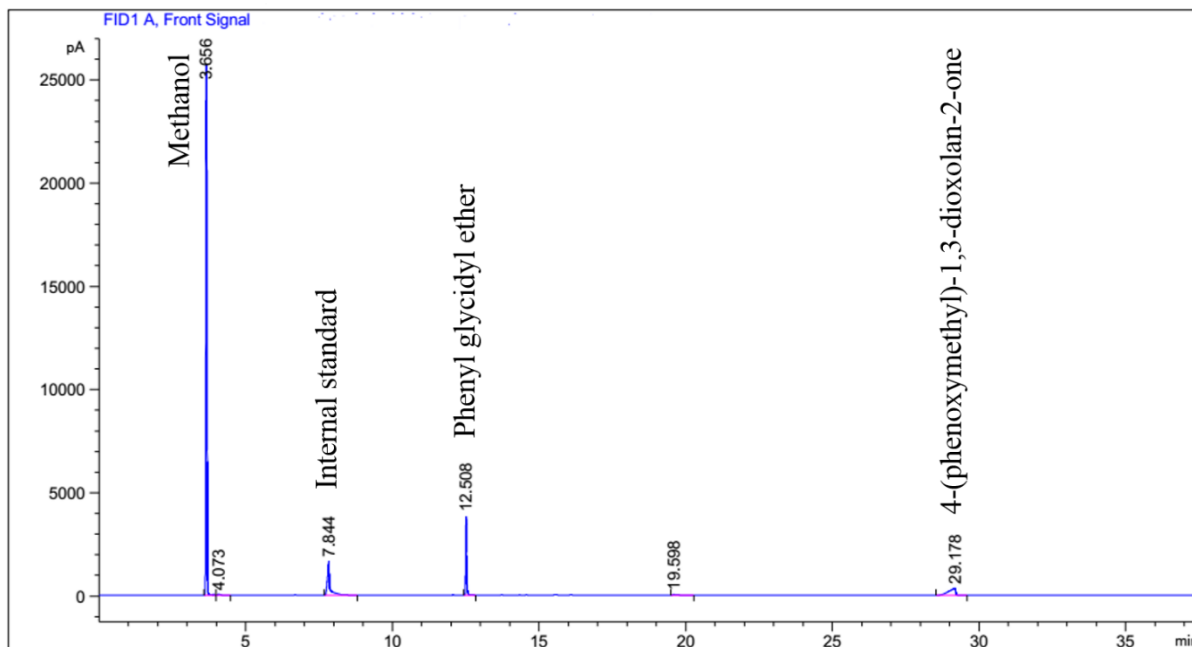

**Fig. S13** GC chromatogram of CO<sub>2</sub>-phenyl glycidyl ether reaction mixture. Injection amount :1 μL. GC program: Set point (Initial): 60 °C, Hold time (Initial): 4 min, Ramp: 20 °C/min, Set point (Final): 230 °C, Hold time (Final): 25 min, FID temperature 280 °C, Split ratio: 50:1.

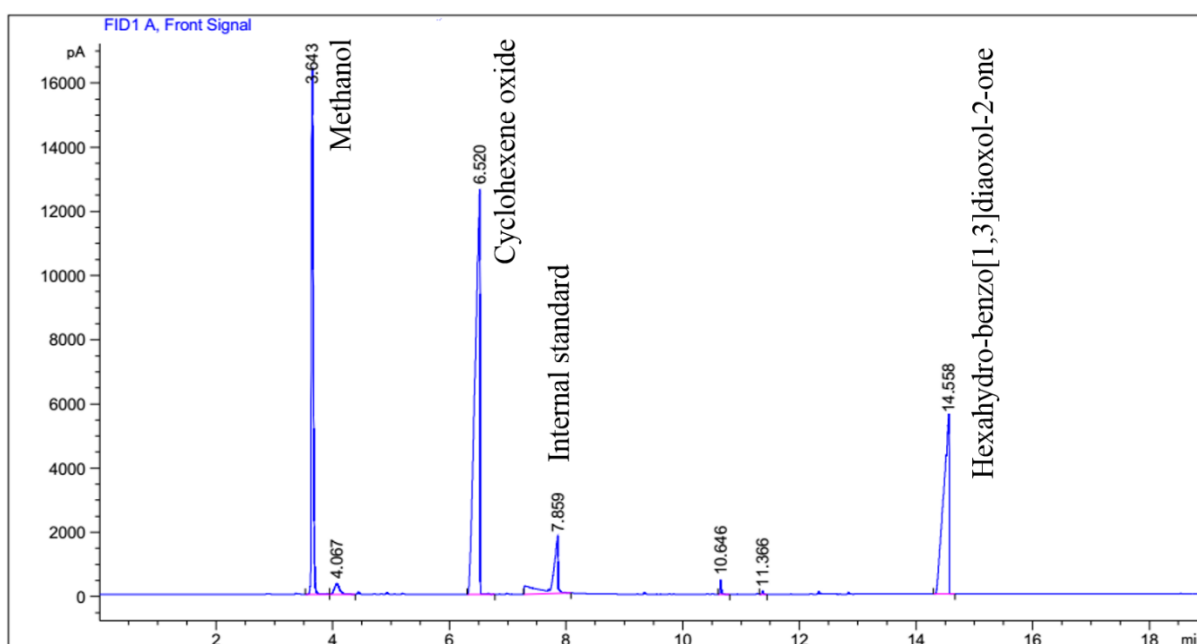

**Fig. S14** GC chromatogram of CO<sub>2</sub>-cyclohexene oxide reaction mixture. Injection amount :1 μL. GC program: Set point (Initial): 60 °C, Hold time (Initial): 4 min, Ramp: 20 °C/min, Set point (Final): 230 °C, Hold time (Final): 6 min, FID temperature 250 °C, Split ratio: 50:1.

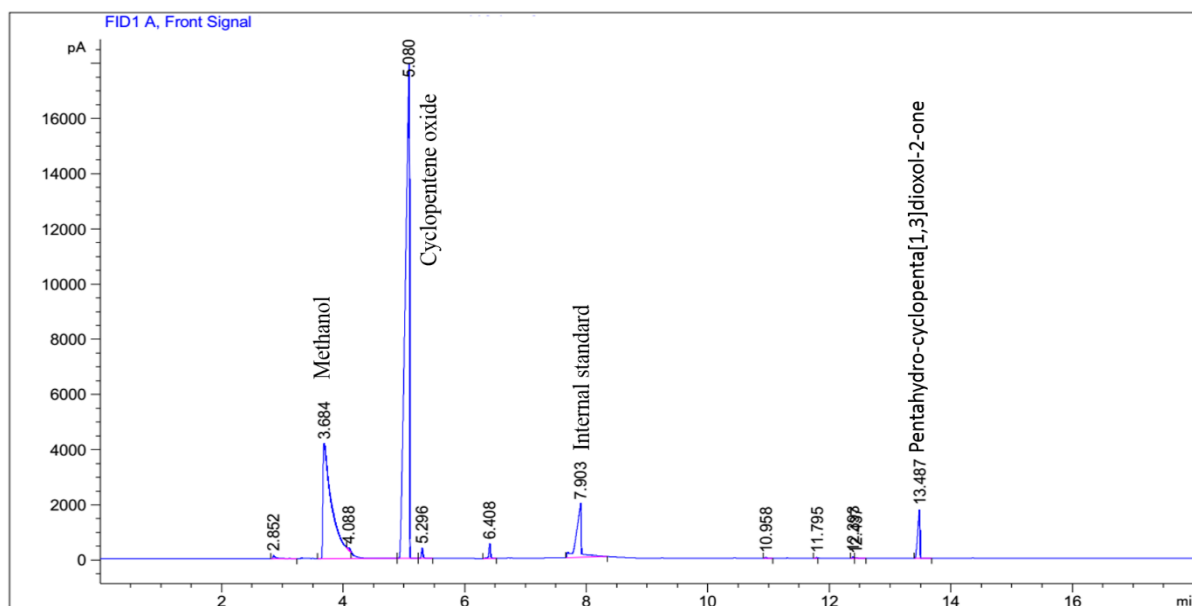

**Fig. S15** GC chromatogram of CO<sub>2</sub>-cyclopentene oxide reaction mixture. Injection amount :1 μL. GC program: Set point (Initial): 60 °C, Hold time (Initial): 4 min, Ramp: 20 °C/min, Set point (Final): 230 °C, Hold time (Final): 5.5 min, FID temperature 250 °C, Split ratio: 50:1.



## Section S10: <sup>1</sup>H NMR spectra of the synthesized carbonate

### 4-chloromethyl-1,3-dioxolan-2-one:

Appearance: pale yellow liquid, Isolated yield: 88 %

<sup>1</sup>H NMR (CDCl<sub>3</sub>, 400 MHz) δ (ppm): 5.00-4.95 (m, 1H), 4.58 (t, *J*=8.5 Hz, 1H), 4.39 (q, *J*=5.7, 8.8 Hz, 1H), 3.78 (dd, *J*=5.3, 12.2 Hz, 1H), 3.71 (dd, *J*=3.6, 12.6 Hz, 1H). FTIR (ν<sub>max</sub>/ cm<sup>-1</sup>) 1809 (C=O), 1074 (C-O), 2954 (C-H).

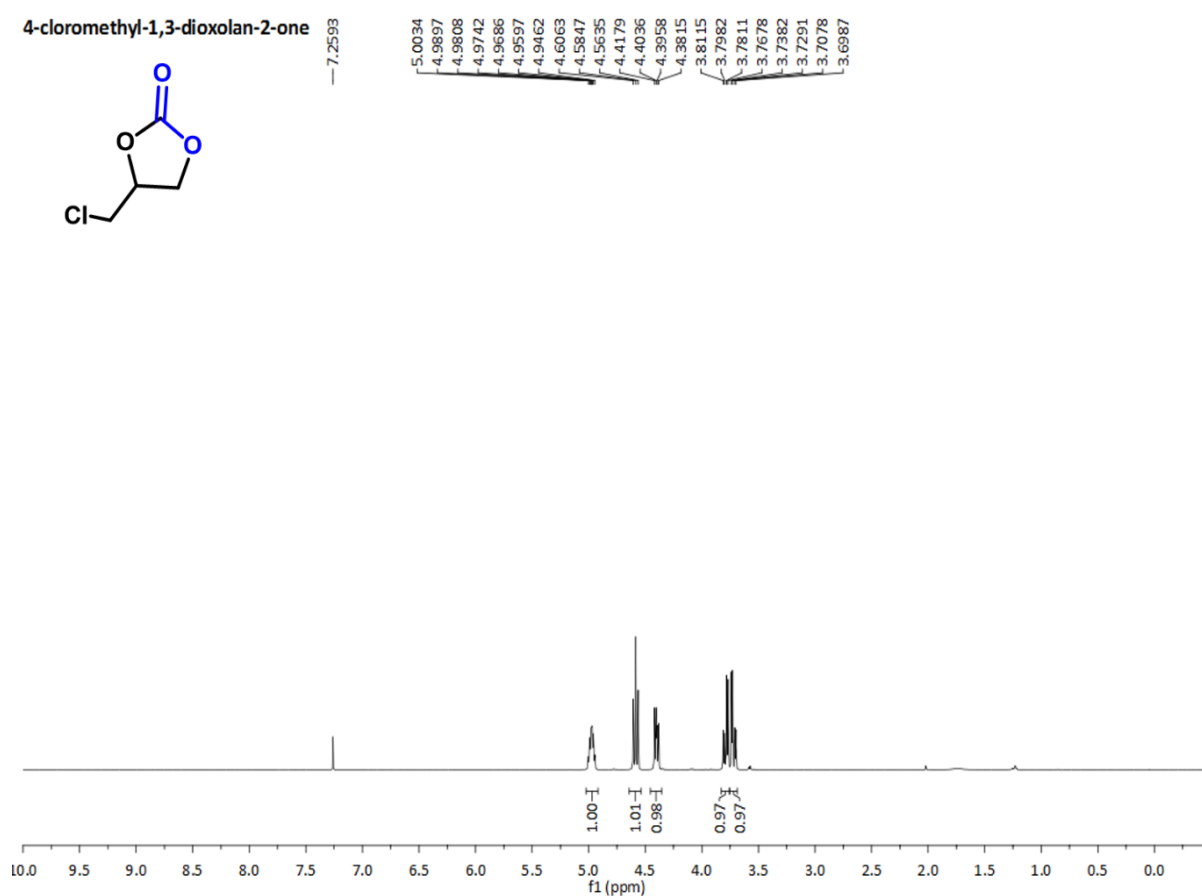

**Fig. S16** <sup>1</sup>H NMR spectrum of 4-chloromethyl-1,3-dioxolan-2-one, synthesized from the CO<sub>2</sub>-epichlorohydrin cycloaddition reaction using NSC-773 catalyst.

## Propylene carbonate:

Appearance: colourless liquid, Isolated yield: 84 %

$^1\text{H}$  NMR ( $\text{CDCl}_3$ , 400 MHz)  $\delta$  (ppm): 4.79-4.70 (m, 1H), 4.44 (q,  $J=7.7, 8.4$  Hz, 1H), 3.90 (q,  $J=7.2, 8.4$  Hz, 1H), 1.34 (d,  $J=6.2$ , 3H). FTIR ( $\nu_{\text{max}}/\text{cm}^{-1}$ ) 1787 (C=O), 1052 (C-O), 2928 (C-H).

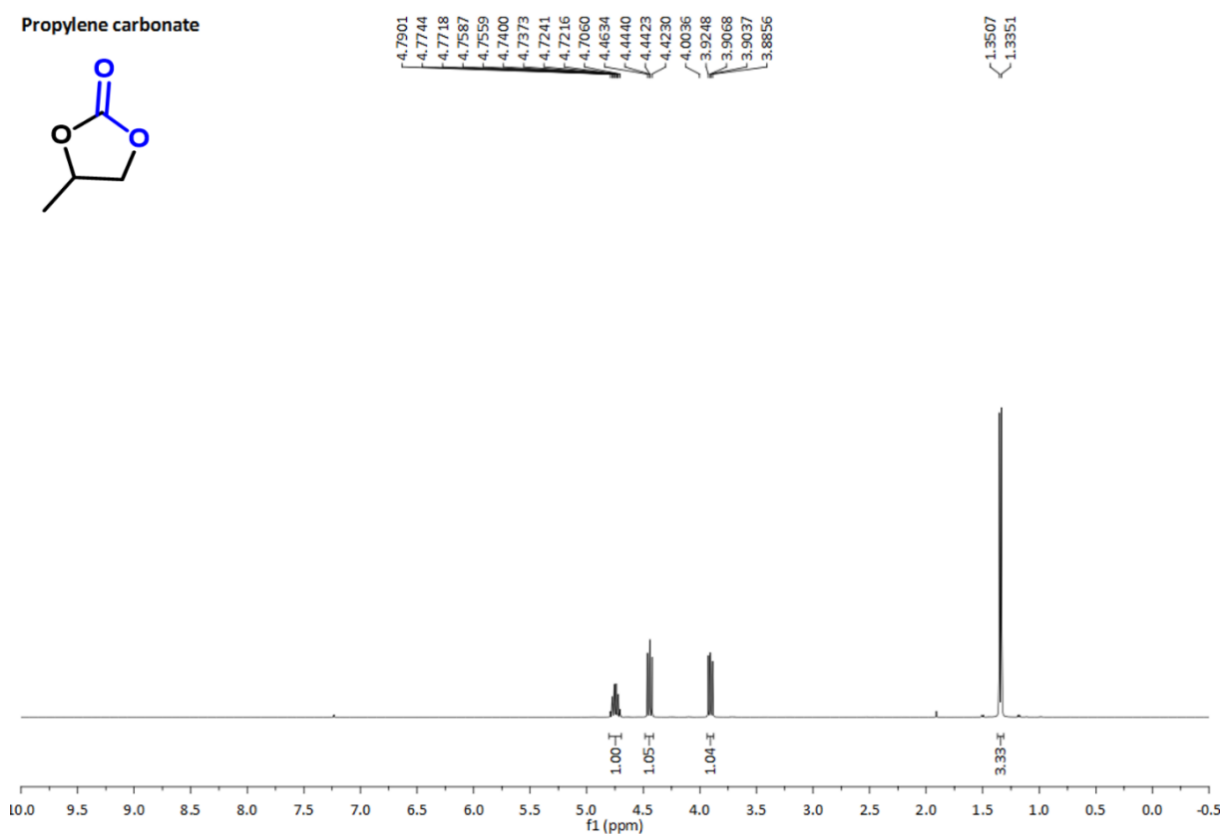

**Fig. S17**  $^1\text{H}$  NMR spectrum of Propylene carbonate, synthesized from the  $\text{CO}_2$ -propylene oxide cycloaddition reaction using NSC-773 catalyst.

### 4-ethyl-1,3-dioxolan-2-one:

Appearance: yellowish liquid, Isolated yield: 69 %

$^1\text{H NMR}$  ( $\text{CDCl}_3$ , 400 MHz)  $\delta$  (ppm): 4.64-4.57(m, 1H), 4.47 (t,  $J=8.1$  Hz, 1H), 4.01 (q,  $J=6.96$ , 8.44 Hz, 1H), 1.78-1.62 (m, 2H), 0.93 (t,  $J=7.4$  Hz, 3H). FTIR ( $\nu_{\text{max}}/\text{cm}^{-1}$ ) 1792 (C=O), 1056 (C-O), 2963 (C-H).

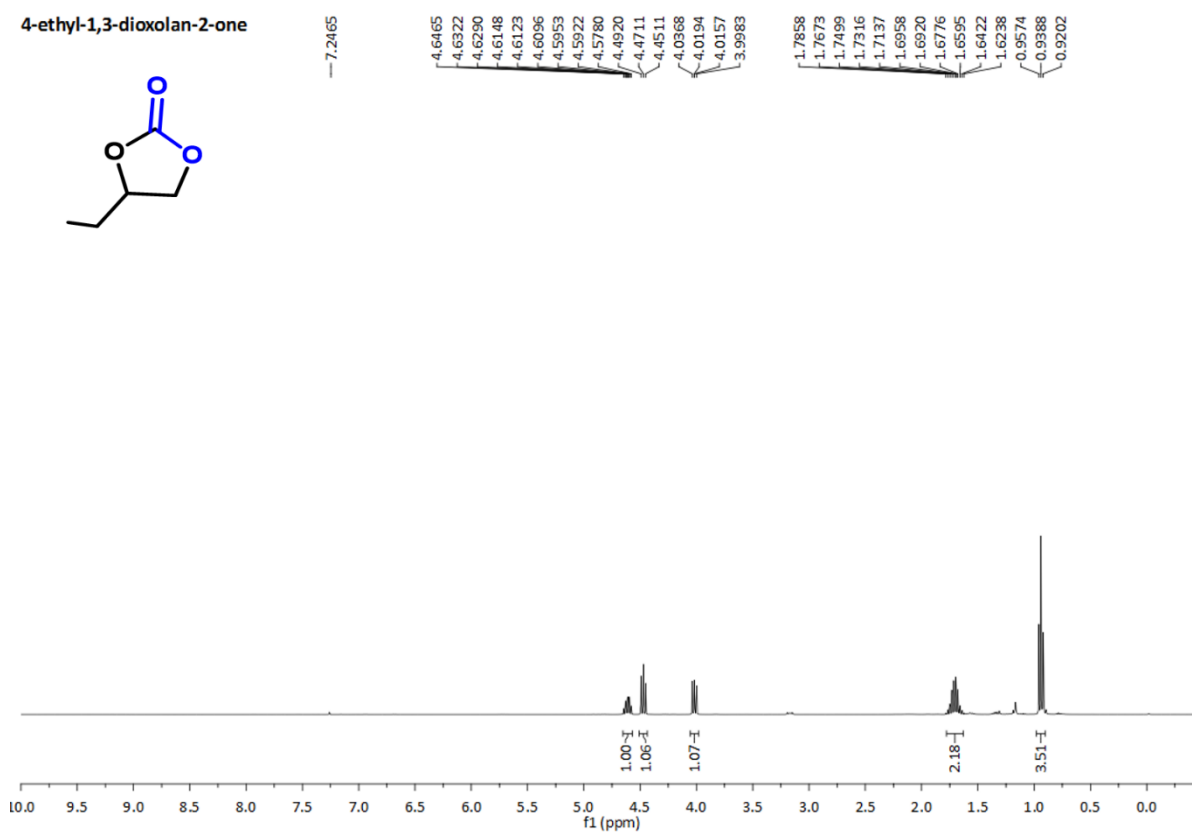

**Fig. S18**  $^1\text{H NMR}$  spectrum of 4-ethyl-1,3-dioxolan-2-one, synthesized from the  $\text{CO}_2$ -1,2-epoxybutane cycloaddition reaction using NSC-773 catalyst.

#### 4-((allyloxy)methyl)-1,3-dioxolan-2-one:

Appearance: pale yellow liquid, Isolated yield: 91%

$^1\text{H}$  NMR ( $\text{CDCl}_3$ , 400 MHz)  $\delta$  (ppm): 5.83-5.72 (m, 1H), 5.20-5.09 (m, 2H), 4.76-4.73 (m, 1H), 4.43-4.39 (m, 1H), 4.31-4.27 (m, 1H), 3.96-3.95 (m, 2H), 3.63-3.59 (m, 1H), 3.54-3.49 (m, 1H). FTIR ( $\nu_{\text{max}}/\text{cm}^{-1}$ ) 1790 (C=O), 1044 (C-O), 2916 (C-H).

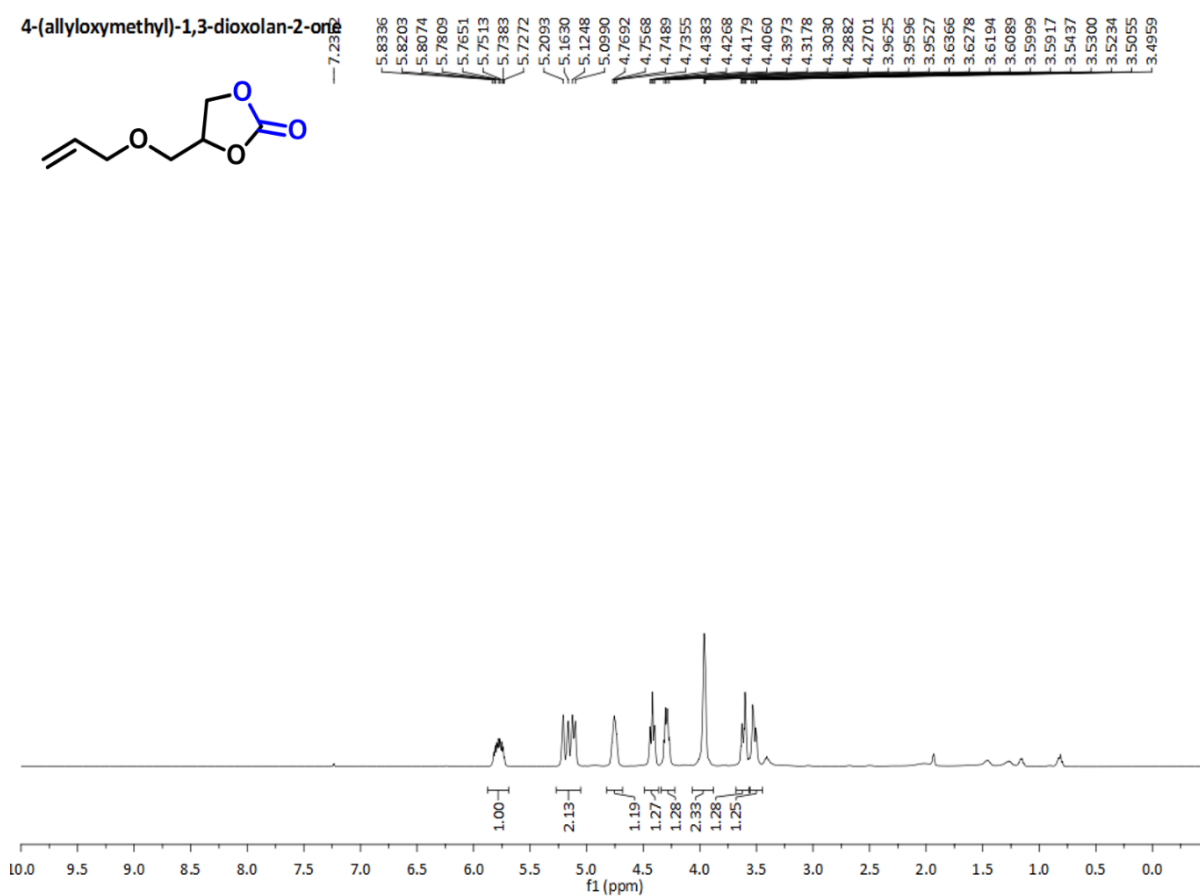

**Fig. S19**  $^1\text{H}$  NMR spectrum of 4-((allyloxy)methyl)-1,3-dioxolan-2-one, synthesized from the  $\text{CO}_2$ -allyl glycidyl ether cycloaddition reaction using NSC-773 catalyst.

#### 4-(butoxymethyl)-1,3-dioxolan-2-one

Appearance: colourless liquid, Isolated yield: 89 %

$^1\text{H NMR}$  ( $\text{CDCl}_3$ , 400 MHz)  $\delta$  (ppm): 4.79-4.73 (m, 1H), 4.44 (t,  $J=8.3$  Hz, 1H), 4.32 (t,  $J=7.14$  Hz, 1H), 3.63-3.60 (m, 1H), 3.55-3.52 (m, 1H), 3.45 (t,  $J=6.42$  Hz, 2H), 1.53-1.46 (m, 2H), 1.36-1.26 (m, 2H), 0.85 (t,  $J=7.3$  Hz, 3H). FTIR ( $\nu_{\text{max}}/\text{cm}^{-1}$ ) 1795 (C=O), 1053 (C-O), 2924 (C-H).

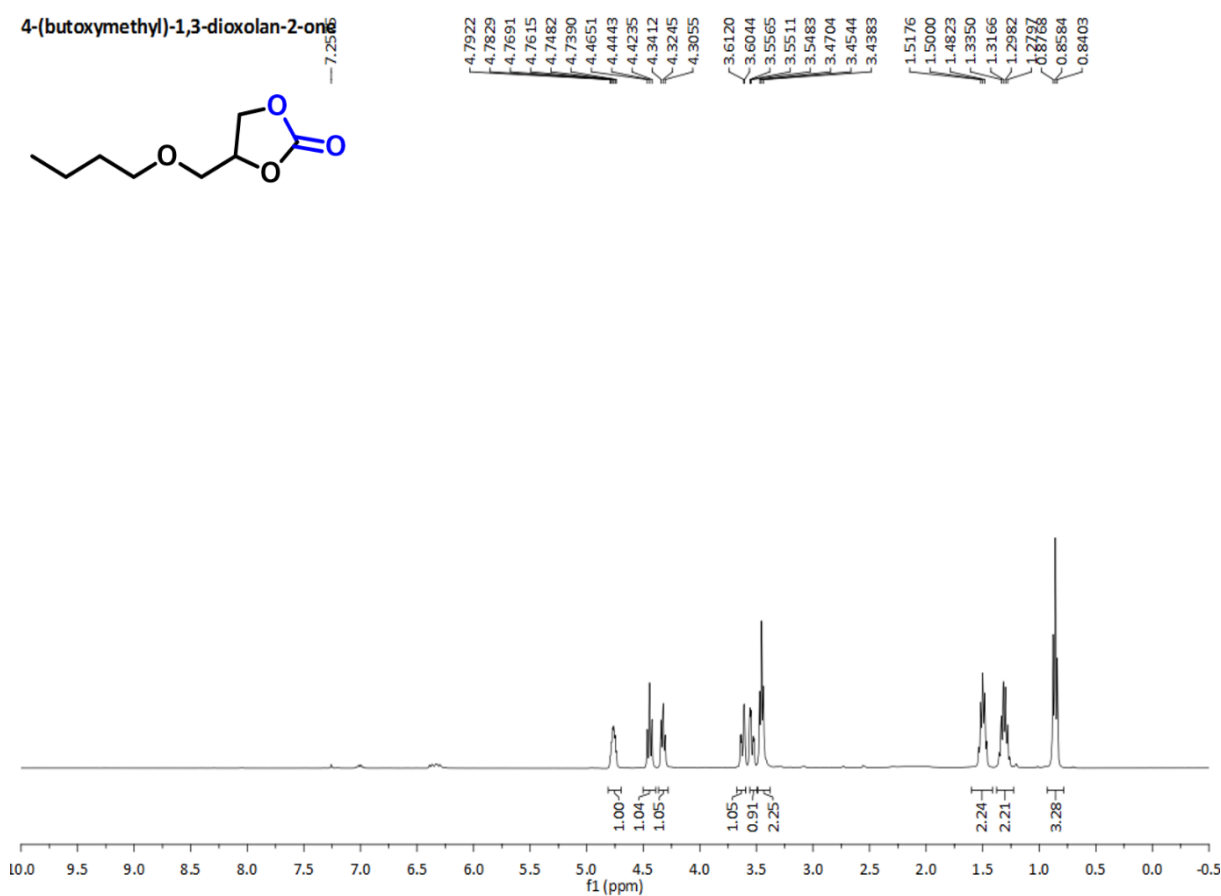

**Fig. S20**  $^1\text{H NMR}$  spectrum of 4-(butoxymethyl)-1,3-dioxolan-2-one, synthesized from the  $\text{CO}_2$ -n-butyl glycidyl ether cycloaddition reaction using NSC-773 catalyst.



### 4-hexyl-1,3-dioxolan-2-one

Appearance: pale yellow liquid, Isolated yield: 42 %

$^1\text{H}$  NMR ( $\text{CDCl}_3$ , 400 MHz)  $\delta$  (ppm): 4.70-4.65 (m, 1H), 4.53-4.43 (m, 1H), 4.05 (t,  $J=7.7$  Hz, 1H), 1.81-1.63 (m, 2H), 1.32-1.18 (m, 9H), 0.88-0.85 (m, 2H). FTIR ( $\nu_{\text{max}}/\text{cm}^{-1}$ ) 1801 (C=O), 1062 (C-O), 2942 (C-H).

4-hexyl-1,3-dioxolan-2-one

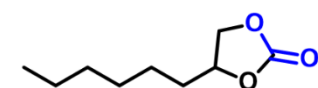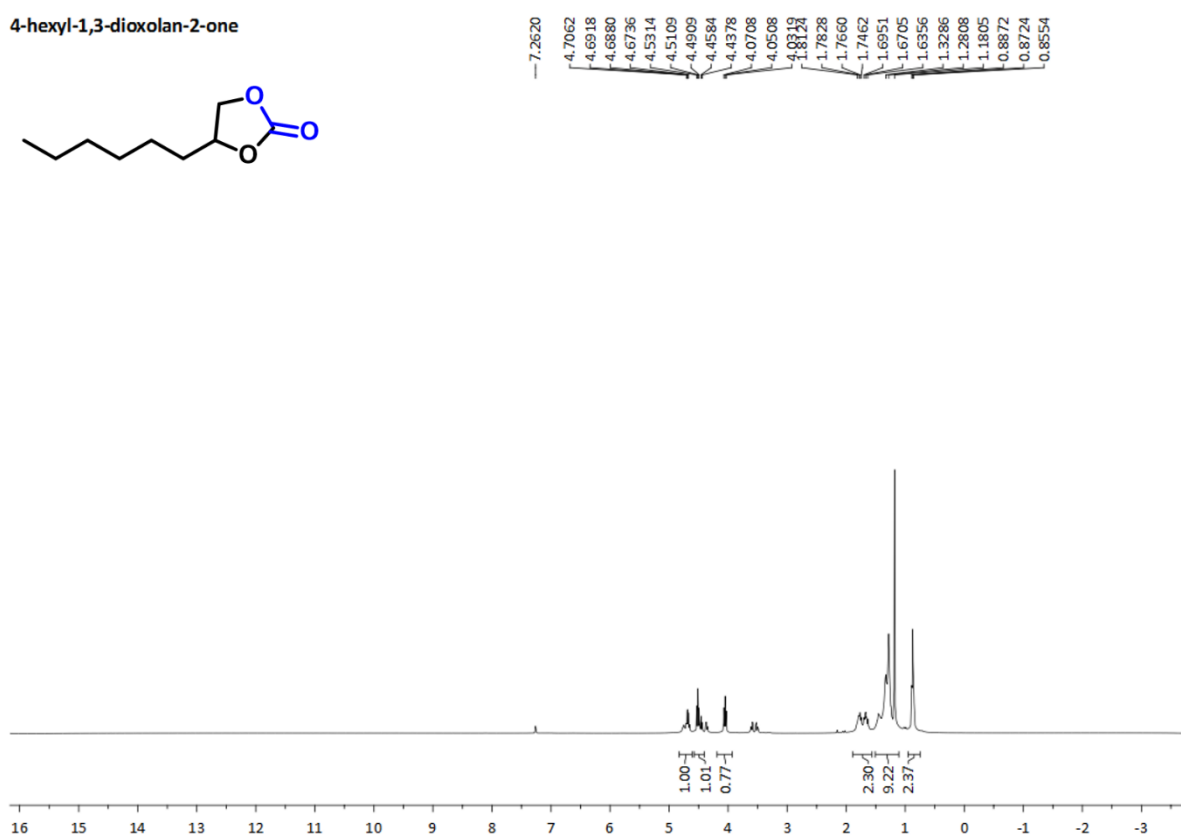

**Fig. S21**  $^1\text{H}$  NMR spectrum of 4-hexyl-1,3-dioxolan-2-one, synthesized from the  $\text{CO}_2$ -2-hexyloxirane cycloaddition reaction using NSC-773 catalyst.

### 4-(tert-butoxymethyl)-1,3-dioxolan-2-one

Appearance: brown liquid, Isolated yield: 63 %

$^1\text{H NMR}$  ( $\text{CDCl}_3$ , 400 MHz)  $\delta$  (ppm): 4.78-4.72 (m, 1H), 4.46 (t,  $J=8.2$  Hz, 1H), 4.38-4.35 (m, 1H), 3.60 (dd,  $J=4.5, 10.3$  Hz, 1H), 3.52 (dd,  $J=6.4, 10.3$  Hz, 1H), 1.18 (s, 9H). FTIR ( $\nu_{\text{max}}$ / $\text{cm}^{-1}$ ) 1794 (C=O), 1056 (C-O), 2975 (C-H).

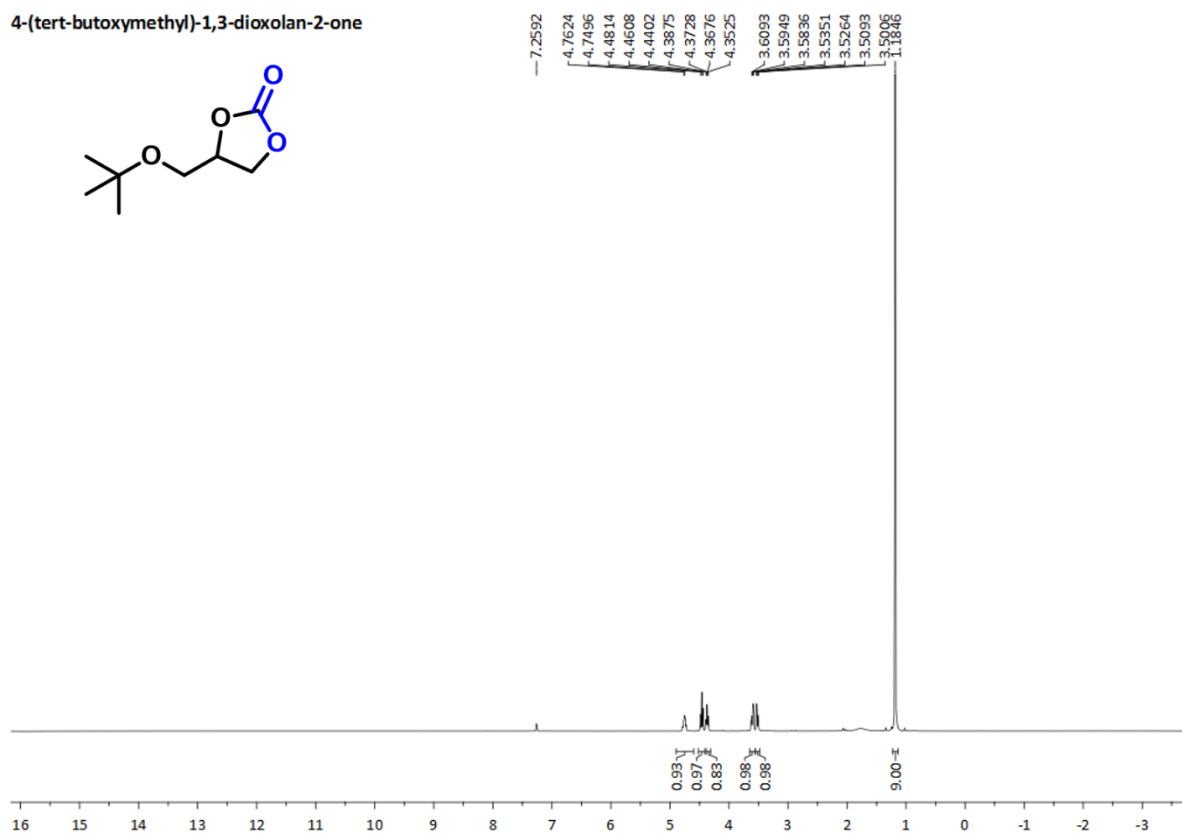

**Fig. S22**  $^1\text{H NMR}$  spectrum of 4-(tert-butoxymethyl)-1,3-dioxolan-2-one, synthesized from the  $\text{CO}_2$ -2-(tert-butoxymethyl) oxirane cycloaddition reaction using NSC-773 catalyst.

### Styrene carbonate:

Appearance: white solid, Isolated yield: 61 %

$^1\text{H}$  NMR ( $\text{CDCl}_3$ , 400 MHz)  $\delta$  (ppm): 7.42-7.32 (m, 5H), 5.65 (t,  $J=8$  Hz, 1H), 4.78 (t,  $J=8.4$  Hz, 1H), 4.32 (t,  $J=8.2$  Hz, 1H). FTIR ( $\nu_{\text{max}}/\text{cm}^{-1}$ ) 1797 (C=O) 1076 (C-O), 3043 (C-H).

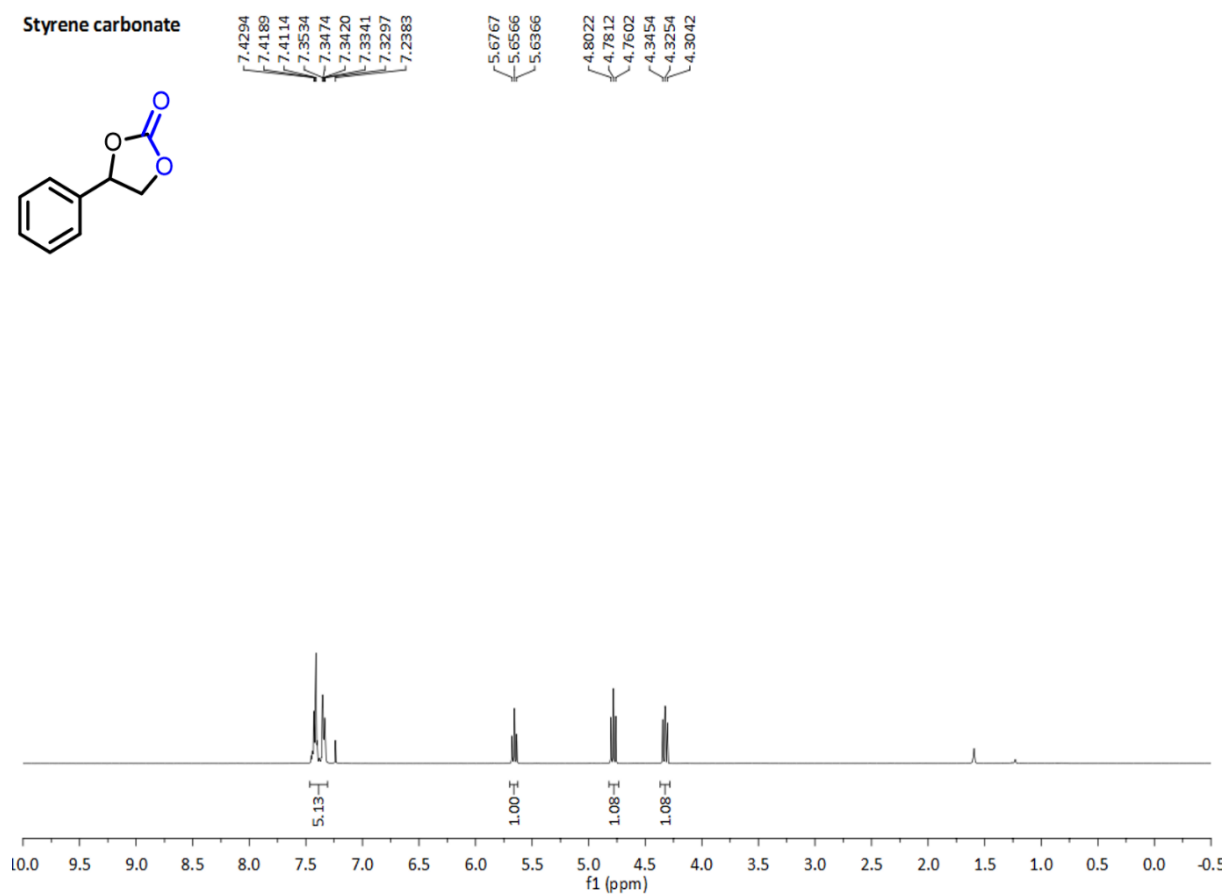

**Fig. S23**  $^1\text{H}$  NMR spectrum of styrene carbonate, synthesized from the  $\text{CO}_2$ -styrene oxide cycloaddition reaction using NSC-773 catalyst.

### 4-(phenoxymethyl)-1,3-dioxolan-2-one

Appearance: white solid, Isolated yield: 71 %

$^1\text{H}$  NMR ( $\text{CDCl}_3$ , 400 MHz)  $\delta$  (ppm): 7.32-7.26 (m, 2H), 7.01 (t,  $J=7.3$  Hz, 1H), 6.92-6.89 (m, 2H), 5.05-4.99 (m, 1H), 4.60 (t,  $J=8.4$  Hz, 1H), 4.54-4.51 (m, 1H), 4.23 (dd,  $J=4.0, 10.6$ , 1H), 4.13 (dd,  $J=3.5, 10.6$  Hz, 1H). FTIR ( $\nu_{\text{max}}/\text{cm}^{-1}$ ) 1801 (C=O), 1091 (C-O), 2924 (C-H).

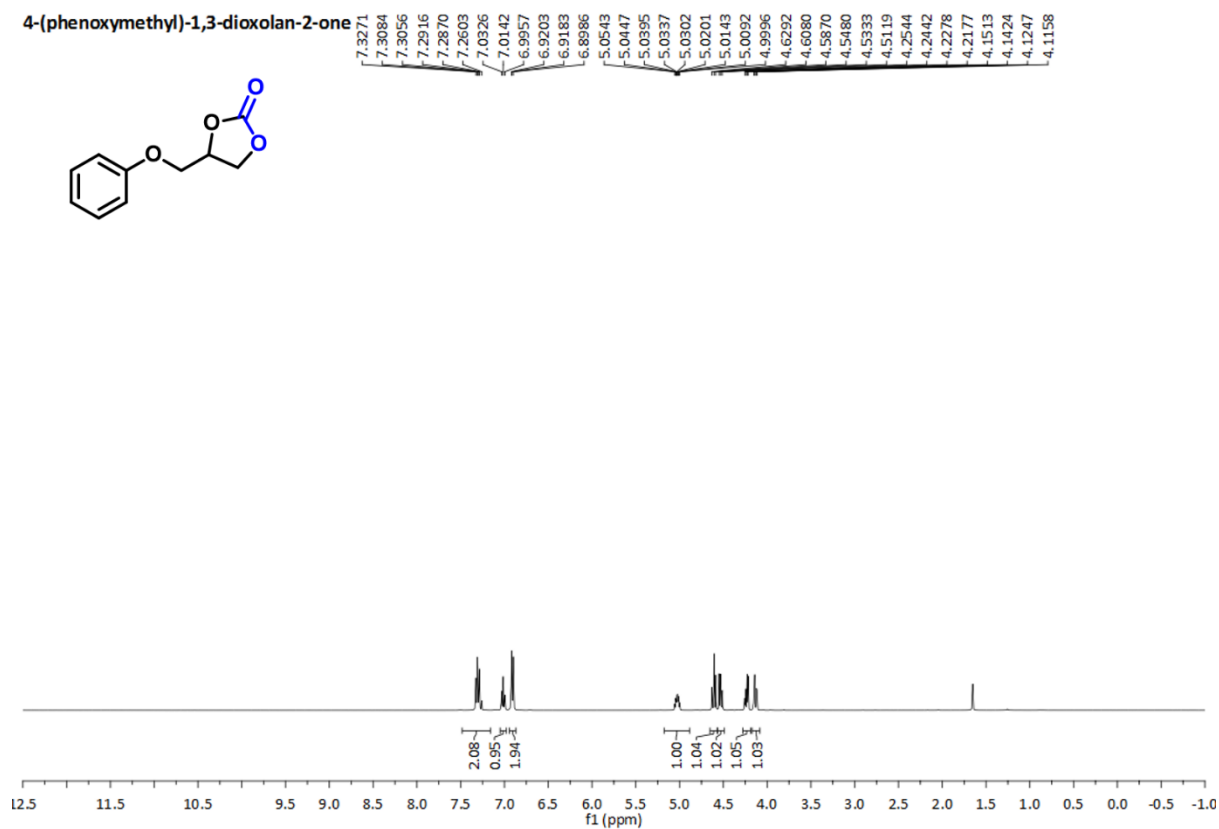

**Fig. S24**  $^1\text{H}$  NMR spectrum of 4-(phenoxymethyl)-1,3-dioxolan-2-one, synthesized from the  $\text{CO}_2$ -phenyl glycidyl ether cycloaddition reaction using NSC-773 catalyst.

### Hexahydro-benzo [1,3] dioxol-2-one:

Appearance: Pale yellow liquid, Isolated yield: 47 %

$^1\text{H NMR}$  ( $\text{CDCl}_3$ , 400 MHz)  $\delta$  (ppm): 4.69-4.07 (m, 2H), 1.87-1.85 (m, 4H), 1.64-4.54 (m, 2H), 1.44-1.35 (m, 2H). FTIR ( $\nu_{\text{max}}/\text{cm}^{-1}$ ) 1801 (C=O), 1027, (C-O), 2936 (C-H).

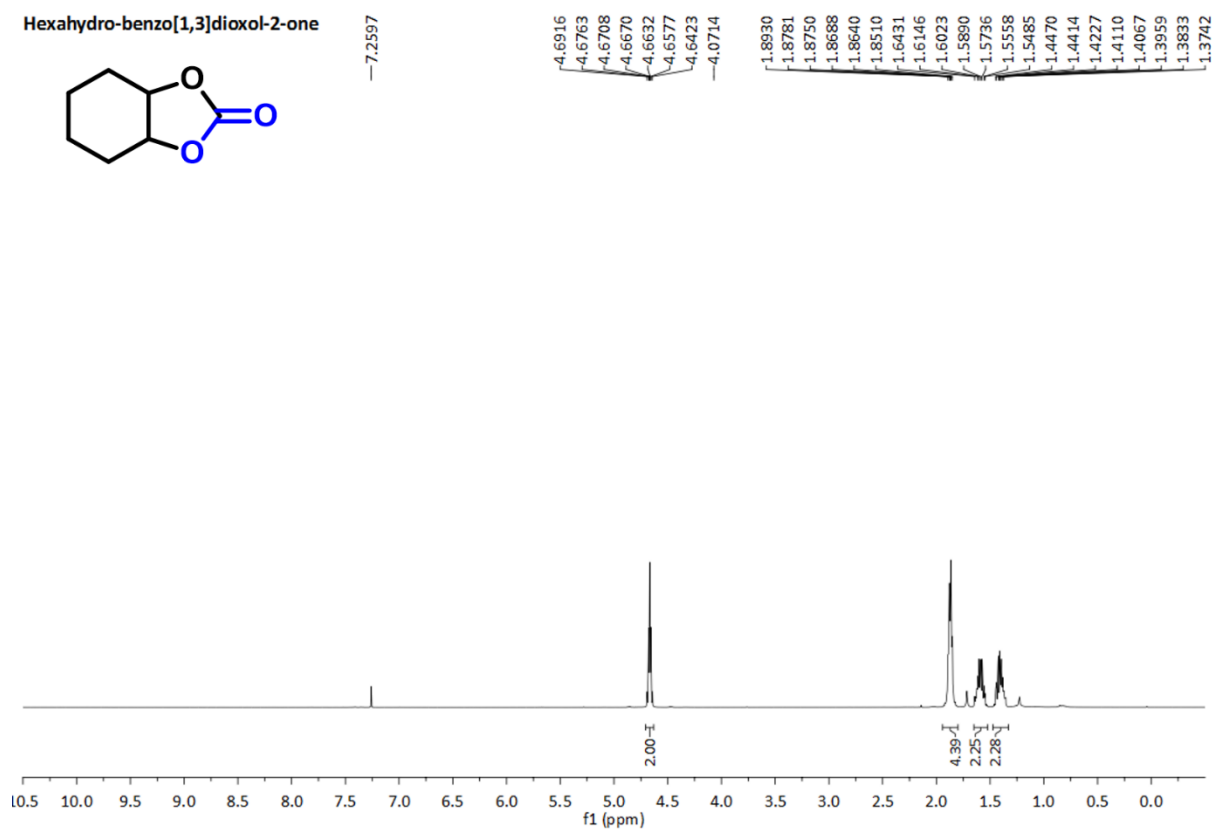

**Fig. S25**  $^1\text{H NMR}$  spectrum of hexahydro-benzo [1,3] dioxol-2-one, synthesized from the  $\text{CO}_2$ -cyclohexene oxide cycloaddition reaction using NSC-773 catalyst.



**Pentahydro-cyclopenta [1,3] dioxal-2-one:**

Appearance: white solid, Isolated yield: 26 %

$^1\text{H NMR}$  ( $\text{CDCl}_3$ , 400 MHz)  $\delta$  (ppm): 5.05-5.04 (m, 2H), 2.08-2.02 (m, 2H), 1.74-1.61 (m, 4H). FTIR ( $\nu_{\text{max}}/\text{cm}^{-1}$ ) 1795 (C=O), 1041 (C-O), 2977 (C-H).

Pentahydro-cyclopenta [1,3] dioxal-2-one

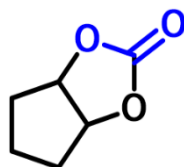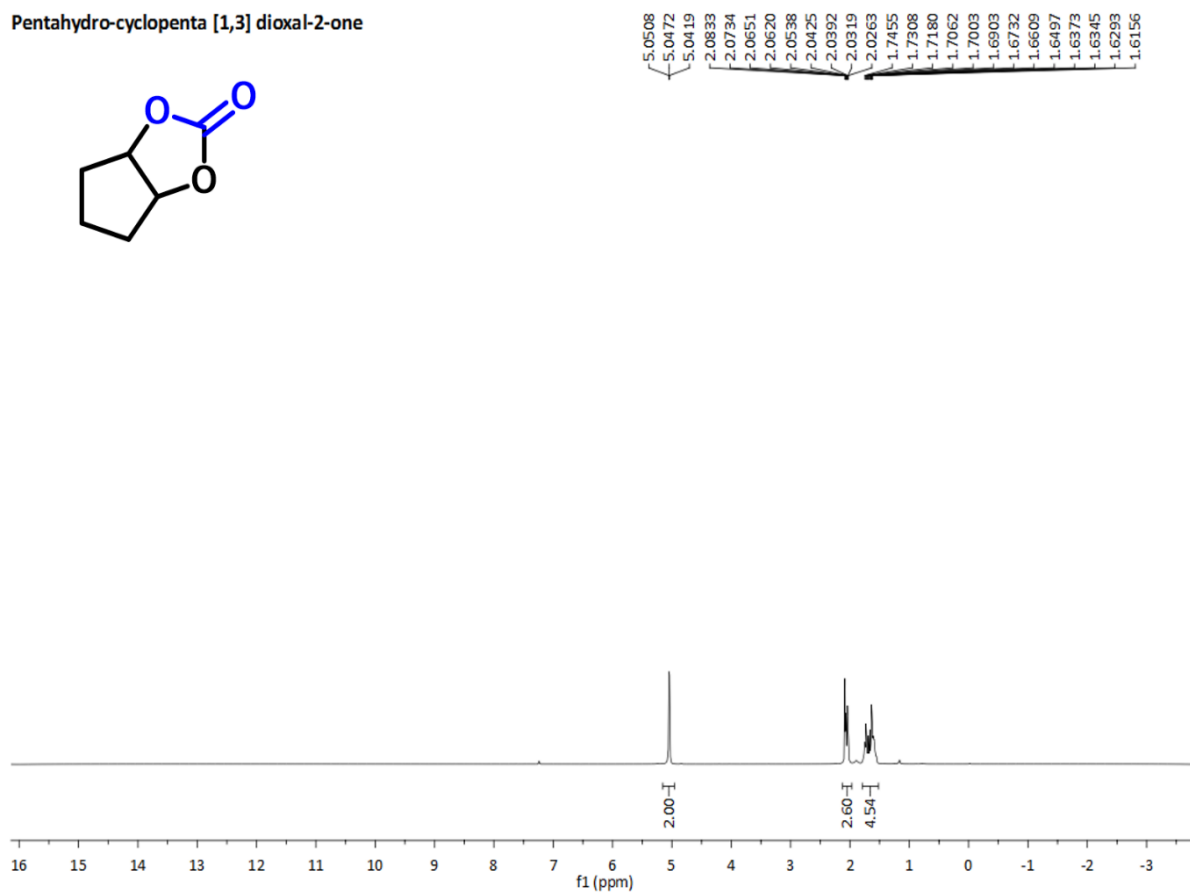

**Fig. S26**  $^1\text{H NMR}$  spectrum of pentahydro-cyclopenta [1,3] dioxal-2-one, synthesized from the  $\text{CO}_2$ -cyclopentene oxide cycloaddition reaction using NSC-773 catalyst.

### Trans-1,2-limonene oxide:

Appearance: colourless reaction mixture turned into greenish

$^1\text{H}$  NMR ( $\text{CDCl}_3$ , 400 MHz) of reaction mixture:  $\delta$  (ppm)= 4.36-4.28 (m, 1H) is the characteristic signal of trans-1,2-limonene oxide. FTIR ( $\nu_{\text{max}}/\text{cm}^{-1}$ ) 1798 (C=O), 1036 (C-O), 2961 (C-H).

#### trans-1,2-limonene carbonate

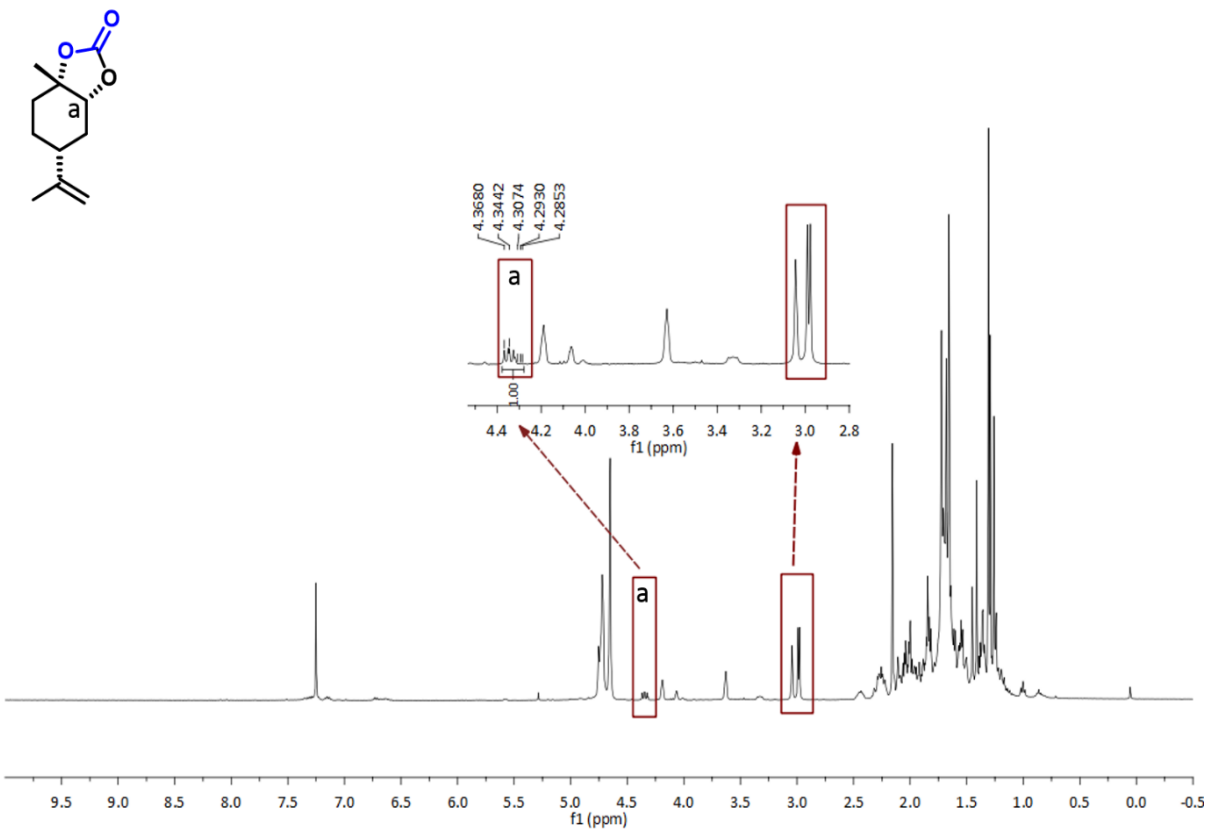

**Fig. S27**  $^1\text{H}$  NMR spectrum of trans-1,2-limonene oxide containing reaction mixture, obtained from the  $\text{CO}_2$ -cis/trans mixtures of 1,2-limonene oxide cycloaddition reaction using NSC-773 catalyst.

### Section S11: Calculations

$$\text{Conversion of epichlorohydrin (\%)} = \frac{\text{initial moles of epichlorohydrin} - \text{final moles of epichlorohydrin}}{\text{initial moles of epichlorohydrin}} \times 100$$

$$\text{Selectivity of cyclic carbonate (\%)} = \frac{\text{moles of the cyclic carbonate formed}}{\text{moles of epichlorohydrin converted}} \times 100$$

The conversion of epichlorohydrin and selectivity of the corresponding carbonate were calculated by plotting the calibration curve through manually injecting standard epichlorohydrin and corresponding carbonate while for the other substrates, the internal standard was used for the calculation.

## Section S12: FTIR analysis of various cyclic carbonates

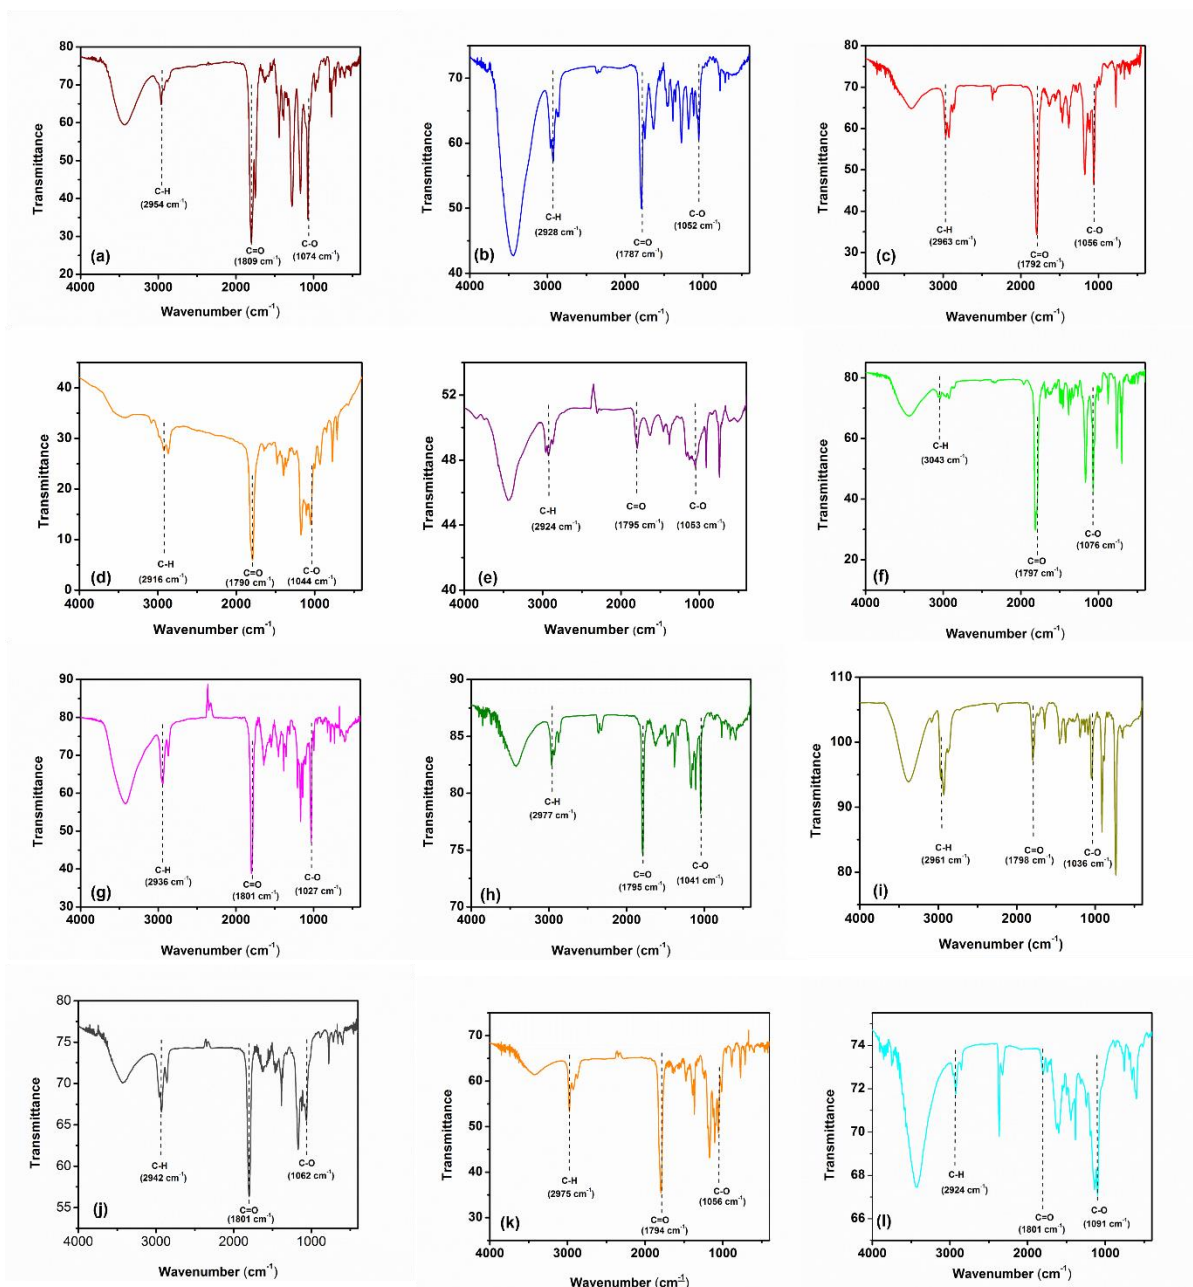

**Fig. S28** FTIR analysis of respective cyclic carbonates of (a) epichlorohydrin; (b) propylene oxide; (c) 1,2-epoxybutane; (d) 4-((allyloxy)methyl)-1,3-dioxolan-2-one; (e) 4-(butoxymethyl)-1,3-dioxolan-2-one; (f) styrene oxide; (g) cyclohexene oxide; (h) cyclopentene oxide; (i) trans-1,2-limonene carbonate; (j) 4-hexyl-1,3-dioxolan-2-one; (k) 4-(tert-butoxymethyl)-1,3-dioxolan-2-one and (l) 4-(phenoxy)methyl-1,3-dioxolan-2-one.

### Section S13: Computational details

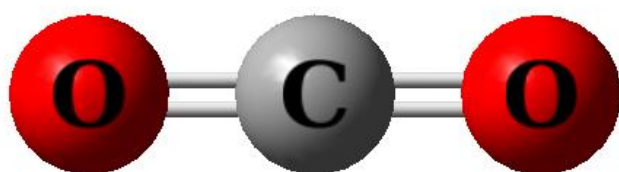

**E = -188.5088194385 au**

|   |          |         |         |
|---|----------|---------|---------|
| C | -3.51167 | 2.43022 | 0.00000 |
| O | -2.34921 | 2.41428 | 0.00000 |
| O | -4.67415 | 2.44613 | 0.00000 |

**Fig. S29** Optimized geometry, energy, and Cartesian coordinates of CO<sub>2</sub> molecule at M06-2X level of theory with 6-31G(d, p) basis set.

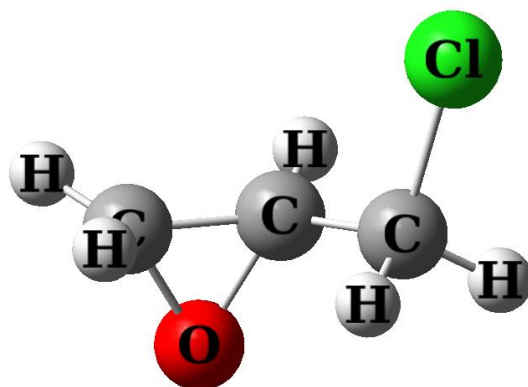

**E = -652.5889146489 au**

|    |          |         |          |
|----|----------|---------|----------|
| C  | -9.61716 | 3.27833 | 0.07373  |
| C  | -8.16635 | 3.12150 | 0.21127  |
| C  | -7.41787 | 2.19548 | -0.70650 |
| Cl | -7.29134 | 0.56397 | 0.02952  |
| H  | -6.40214 | 2.54665 | -0.88960 |

|   |           |         |          |
|---|-----------|---------|----------|
| H | -7.94556  | 2.09968 | -1.65605 |
| O | -8.71652  | 4.25695 | -0.42862 |
| H | -10.20688 | 3.58537 | 0.93343  |
| H | -10.14109 | 2.69450 | -0.68080 |
| H | -7.70421  | 3.30633 | 1.18002  |

**Fig. S30** Optimized geometry, energy, and Cartesian coordinates of epichlorohydrin molecule at M06-2X level of theory with 6-31G(d, p) basis set.

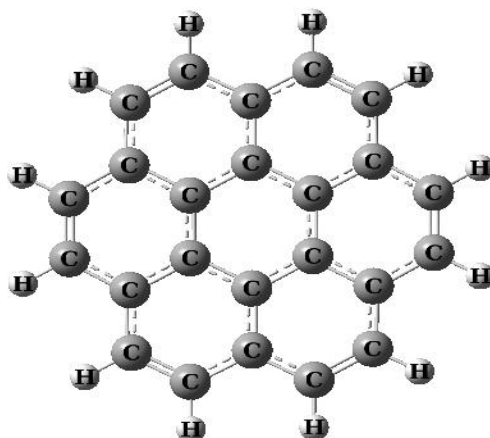

**E = -921.5441224954 au**

|   |          |          |          |
|---|----------|----------|----------|
| C | -5.64333 | 1.65394  | -0.79494 |
| C | -5.60603 | 0.33038  | -0.45757 |
| C | -4.44671 | 2.41621  | -0.91610 |
| C | -4.36931 | -0.33245 | -0.21538 |
| C | -3.20752 | 1.78245  | -0.68116 |
| C | -3.16869 | 0.40091  | -0.32893 |
| C | -1.99449 | 2.52337  | -0.79588 |
| C | -0.74255 | 1.88305  | -0.55846 |
| C | -0.70372 | 0.50151  | -0.20623 |
| C | -1.91676 | -0.23941 | -0.09150 |
| C | 0.45807  | 2.61641  | -0.67201 |
| C | 0.53545  | -0.13226 | 0.02870  |
| C | -1.87832 | -1.60680 | 0.25711  |
| C | -2.03293 | 3.89077  | -1.14449 |
| C | -4.30313 | -1.71038 | 0.13765  |
| C | -4.45802 | 3.79646  | -1.26638 |
| C | -3.10367 | -2.32396 | 0.36513  |
| C | -0.61547 | -2.22241 | 0.48895  |
| C | 0.54677  | -1.51250 | 0.37898  |
| H | 1.50340  | -1.99496 | 0.55873  |
| C | 1.73208  | 0.63001  | -0.09246 |
| C | -3.29578 | 4.50637  | -1.37633 |
| C | -0.80758 | 4.60792  | -1.25251 |
| C | 0.39188  | 3.99433  | -1.02503 |
| C | 1.69478  | 1.95357  | -0.42983 |



|   |          |          |          |
|---|----------|----------|----------|
| H | -0.84336 | 5.65994  | -1.52123 |
| H | 1.31919  | 4.55373  | -1.11106 |
| H | -6.52679 | -0.23928 | -0.36860 |
| H | -6.59403 | 2.14713  | -0.97698 |
| H | 2.61554  | 2.52323  | -0.51880 |
| H | 2.68278  | 0.13681  | 0.08956  |
| H | -5.41465 | 4.27891  | -1.44612 |
| H | -5.23045 | -2.26976 | 0.22368  |
| H | -3.06788 | -3.37597 | 0.63385  |
| H | -0.59223 | -3.27493 | 0.75705  |
| H | -3.31903 | 5.55889  | -1.64444 |

**Fig. S31** Optimized geometry, total energy, and Cartesian coordinates of coronene at M06-2X level of theory with 6-31G(d, p) basis set.

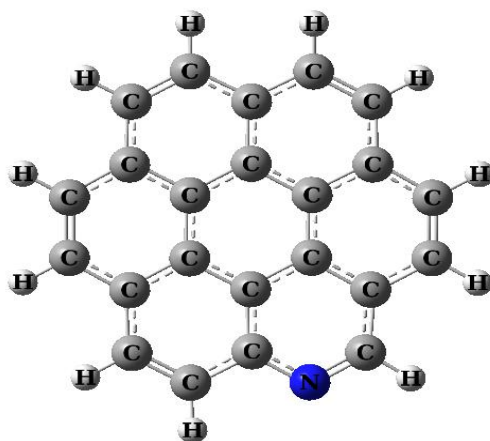

**E = -937.5785019451 au**

|   |          |          |          |
|---|----------|----------|----------|
| C | -5.63181 | 1.67547  | -0.79954 |
| C | -5.60601 | 0.34923  | -0.46222 |
| C | -4.42214 | 2.41551  | -0.91427 |
| C | -4.37603 | -0.33166 | -0.21587 |
| C | -3.20190 | 1.76419  | -0.67586 |
| C | -3.16860 | 0.38702  | -0.32513 |
| C | -1.99917 | 2.50580  | -0.79150 |
| C | -0.74593 | 1.87781  | -0.55708 |
| C | -0.70465 | 0.49727  | -0.20499 |
| C | -1.91578 | -0.24788 | -0.08914 |
| C | 0.44301  | 2.62484  | -0.67490 |
| C | 0.53590  | -0.13075 | 0.02844  |
| C | -1.87862 | -1.61369 | 0.25870  |
| C | -2.07090 | 3.86695  | -1.14089 |
| C | -4.31107 | -1.71057 | 0.13706  |
| C | -4.36348 | 3.79979  | -1.26175 |
| C | -3.10962 | -2.32417 | 0.36453  |
| C | -0.61308 | -2.22591 | 0.48968  |

|   |          |          |          |
|---|----------|----------|----------|
| C | 0.54802  | -1.51217 | 0.37882  |
| H | 1.50500  | -1.99397 | 0.55827  |
| C | 1.72726  | 0.64210  | -0.09572 |
| N | -3.26397 | 4.49869  | -1.37290 |
| C | -0.85797 | 4.60461  | -1.25500 |
| C | 0.35055  | 4.00318  | -1.02985 |
| C | 1.68347  | 1.96675  | -0.43371 |
| H | -0.93169 | 5.65247  | -1.52517 |
| H | 1.26898  | 4.57652  | -1.12008 |
| H | -6.53290 | -0.21061 | -0.37624 |
| H | -6.57688 | 2.17848  | -0.98387 |
| H | 2.60272  | 2.53865  | -0.52344 |
| H | 2.68179  | 0.15582  | 0.08468  |
| H | -5.29833 | 4.32802  | -1.45202 |
| H | -5.23698 | -2.27190 | 0.22352  |
| H | -3.07815 | -3.37653 | 0.63283  |
| H | -0.58525 | -3.27826 | 0.75778  |

**Fig. S32** Optimized geometry, total energy, and Cartesian coordinates of pyridine functionalized coronene at M06-2X level of theory with 6-31G(d, p) basis set.

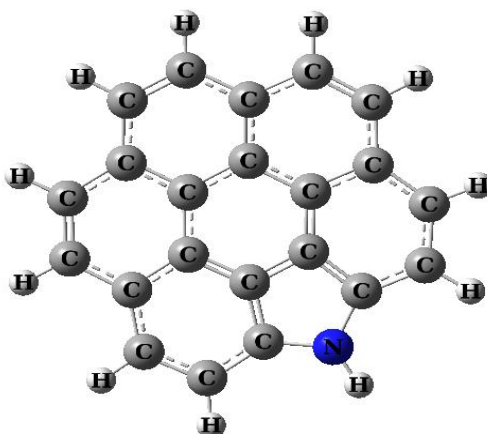

**E = -899.4503842825 au**

|   |          |          |          |
|---|----------|----------|----------|
| C | -5.51361 | 1.77343  | -0.82242 |
| C | -5.55638 | 0.41740  | -0.47983 |
| C | -4.25148 | 2.41157  | -0.90812 |
| C | -4.40421 | -0.38634 | -0.20541 |
| C | -3.16392 | 1.60122  | -0.63560 |
| C | -3.16546 | 0.26259  | -0.29505 |
| C | -1.99904 | 2.34041  | -0.75294 |
| C | -0.74730 | 1.79725  | -0.53855 |
| C | -0.69415 | 0.41894  | -0.18462 |
| C | -1.89889 | -0.34575 | -0.06351 |
| C | 0.36320  | 2.63919  | -0.68536 |
| C | 0.56036  | -0.16447 | 0.03993  |
| C | -1.86415 | -1.70334 | 0.28344  |

|   |          |          |          |
|---|----------|----------|----------|
| C | -2.31394 | 3.64108  | -1.10334 |
| C | -4.33471 | -1.77600 | 0.15189  |
| N | -3.71845 | 3.68228  | -1.19929 |
| C | -3.12688 | -2.39005 | 0.38110  |
| C | -0.58025 | -2.28265 | 0.50866  |
| C | 0.57937  | -1.54664 | 0.39230  |
| H | 1.53665  | -2.02829 | 0.57292  |
| C | 1.71597  | 0.68363  | -0.10546 |
| C | -1.20406 | 4.50830  | -1.25668 |
| C | 0.08083  | 3.99487  | -1.04775 |
| C | 1.63358  | 2.01180  | -0.44842 |
| H | -1.31631 | 5.55238  | -1.52939 |
| H | 0.91806  | 4.67649  | -1.17039 |
| H | -6.53406 | -0.05284 | -0.41970 |
| H | -6.44383 | 2.29839  | -1.01268 |
| H | 2.54566  | 2.59508  | -0.54143 |
| H | 2.69468  | 0.24340  | 0.06592  |
| H | -4.25925 | 4.49637  | -1.43953 |
| H | -5.25090 | -2.35312 | 0.24291  |
| H | -3.11354 | -3.44306 | 0.64946  |
| H | -0.51962 | -3.33341 | 0.77932  |

**Fig. S33** Optimized geometry, total energy, and Cartesian coordinates of pyrrole functionalized coronene at M06-2X level of theory with 6-31G(d, p) basis set.

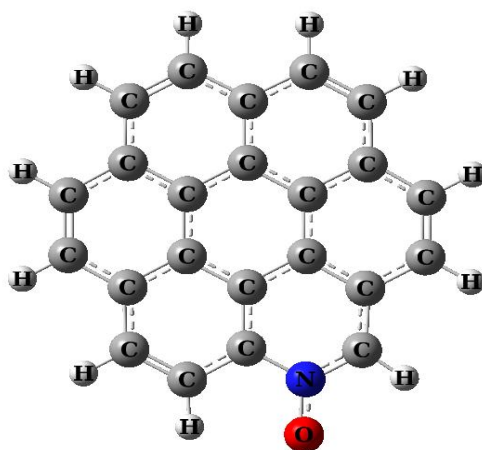

**E = -1012.7104847862 au**

|   |          |          |          |
|---|----------|----------|----------|
| C | -5.64168 | 1.67357  | -0.80457 |
| C | -5.60869 | 0.34840  | -0.46495 |
| C | -4.43370 | 2.42072  | -0.92191 |
| C | -4.37972 | -0.33064 | -0.21755 |
| C | -3.21298 | 1.76752  | -0.68142 |
| C | -3.17560 | 0.39424  | -0.32923 |
| C | -2.01150 | 2.51322  | -0.79876 |
| C | -0.75424 | 1.88976  | -0.56364 |

|   |          |          |          |
|---|----------|----------|----------|
| C | -0.71241 | 0.50910  | -0.20933 |
| C | -1.92130 | -0.23841 | -0.09216 |
| C | 0.43546  | 2.63745  | -0.68211 |
| C | 0.52940  | -0.11611 | 0.02501  |
| C | -1.88130 | -1.60370 | 0.25788  |
| C | -2.04528 | 3.86735  | -1.14625 |
| C | -4.31165 | -1.70830 | 0.13745  |
| C | -4.41535 | 3.79008  | -1.27024 |
| C | -3.10964 | -2.31955 | 0.36581  |
| C | -0.61457 | -2.21212 | 0.48947  |
| C | 0.54518  | -1.49603 | 0.37735  |
| H | 1.50329  | -1.97520 | 0.55739  |
| C | 1.72071  | 0.65749  | -0.09993 |
| N | -3.28293 | 4.49611  | -1.38194 |
| C | -0.85753 | 4.62180  | -1.26662 |
| C | 0.34865  | 4.01327  | -1.03820 |
| C | 1.67752  | 1.98044  | -0.43948 |
| H | -0.94768 | 5.66547  | -1.53830 |
| H | 1.26731  | 4.58539  | -1.12847 |
| H | -6.53559 | -0.21141 | -0.37845 |
| H | -6.58901 | 2.17077  | -0.98873 |
| H | 2.59554  | 2.55369  | -0.53002 |
| H | 2.67515  | 0.17148  | 0.08161  |
| H | -5.30898 | 4.36611  | -1.47152 |
| H | -5.23676 | -2.27090 | 0.22478  |
| H | -3.07449 | -3.37111 | 0.63580  |
| H | -0.58424 | -3.26391 | 0.75922  |
| O | -3.29740 | 5.72515  | -1.69679 |

**Fig. S34** Optimized geometry, total energy, and Cartesian coordinates of pyridinium oxide functionalized coronene at M06-2X level of theory with 6-31G(d, p) basis set.

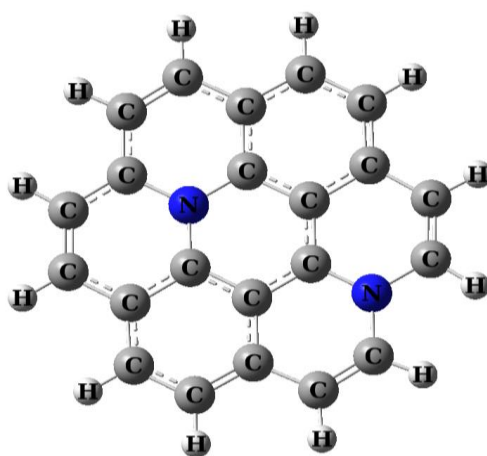

**E = -954.7032003489 au**

|   |          |          |          |
|---|----------|----------|----------|
| C | -5.61539 | 1.65380  | -0.79320 |
| C | -5.61961 | 0.33948  | -0.46054 |
| C | -4.43532 | 2.41048  | -0.91399 |
| C | -4.36781 | -0.32844 | -0.21622 |
| N | -3.18878 | 1.77282  | -0.67758 |
| C | -3.15776 | 0.42657  | -0.33474 |
| C | -2.01034 | 2.50019  | -0.79098 |
| C | -0.75650 | 1.86942  | -0.55592 |
| C | -0.72252 | 0.51105  | -0.20982 |
| C | -1.91304 | -0.22061 | -0.09605 |
| C | 0.45843  | 2.62622  | -0.67457 |
| N | 0.50463  | -0.11676 | 0.02295  |
| C | -1.88688 | -1.61239 | 0.25801  |
| C | -2.03533 | 3.88709  | -1.14374 |
| C | -4.29476 | -1.67391 | 0.12888  |
| C | -4.44211 | 3.77438  | -1.25994 |
| C | -3.06616 | -2.30826 | 0.36333  |
| C | -0.57315 | -2.20223 | 0.48648  |
| C | 0.53938  | -1.47163 | 0.36832  |
| C | 1.69253  | 0.61257  | -0.09042 |
| C | -3.31092 | 4.51207  | -1.37879 |
| C | -0.83418 | 4.58065  | -1.24713 |
| C | 0.39951  | 3.95551  | -1.01473 |
| C | 1.70118  | 1.90804  | -0.41798 |
| H | -0.87145 | 5.63075  | -1.51542 |
| H | 1.32090  | 4.52366  | -1.10331 |
| H | -6.54033 | -0.22452 | -0.37296 |
| H | -6.54349 | 2.18381  | -0.98327 |
| H | 2.64474  | 2.43505  | -0.49470 |
| H | 2.59112  | 0.04144  | 0.10830  |
| H | -5.41780 | 4.21840  | -1.43104 |
| H | -5.22120 | -2.23111 | 0.21441  |
| H | -3.04107 | -3.36043 | 0.63143  |
| H | -0.50079 | -3.24912 | 0.75614  |
| H | -3.33878 | 5.56142  | -1.64639 |
| H | 1.53407  | -1.86907 | 0.52885  |

**Fig. S35** Optimized geometry, total energy, and Cartesian coordinates of quaternary-N functionalized coronene at M06-2X level of theory with 6-31G(d, p) basis set.

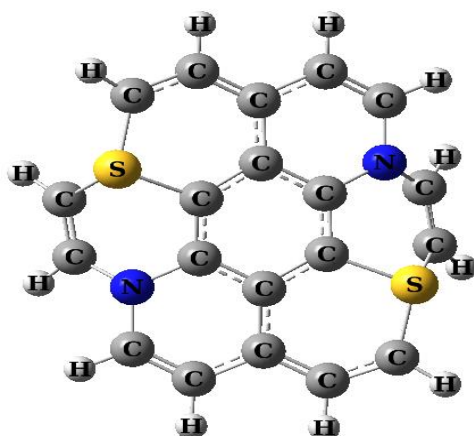

**E = -1674.5896061273 au**

|   |          |          |          |
|---|----------|----------|----------|
| C | -5.69795 | 1.84700  | -0.43695 |
| C | -5.87625 | 0.57616  | 0.10721  |
| C | -4.50434 | 2.51232  | -0.63361 |
| S | -4.56733 | -0.44074 | 0.54647  |
| C | -3.25172 | 1.88789  | -0.27509 |
| C | -3.14047 | 0.56708  | 0.19634  |
| C | -2.03567 | 2.58291  | -0.41512 |
| C | -0.84125 | 1.98235  | -0.02004 |
| C | -0.71504 | 0.59833  | 0.19840  |
| C | -1.92667 | -0.11500 | 0.26536  |
| S | 0.56551  | 3.07598  | -0.02858 |
| C | 0.55194  | -0.08578 | 0.31734  |
| N | -1.91199 | -1.53059 | 0.26780  |
| N | -2.01073 | 3.83311  | -1.07899 |
| C | -4.13689 | -1.75430 | -0.61665 |
| C | -4.42110 | 3.87470  | -1.10414 |
| C | -2.88526 | -2.21142 | -0.45644 |
| C | -0.67282 | -2.18694 | 0.51607  |
| C | 1.73425  | 0.62711  | 0.31062  |
| C | -3.25092 | 4.49439  | -1.30806 |
| C | -0.94462 | 4.12021  | -1.92530 |
| C | 0.30364  | 3.67577  | -1.71207 |
| C | 1.88627  | 2.00902  | 0.21060  |
| H | -1.20939 | 4.70609  | -2.80239 |
| H | 1.14267  | 3.79976  | -2.38206 |
| H | -6.83224 | 0.20987  | 0.44888  |
| H | -6.61456 | 2.39523  | -0.65058 |
| H | 2.80805  | 2.51936  | 0.44446  |
| H | 2.65326  | 0.06852  | 0.48321  |
| H | -5.33964 | 4.42770  | -1.27524 |
| H | -2.54104 | -3.13300 | -0.91997 |
| H | -3.15921 | 5.52463  | -1.62549 |
| C | 0.48405  | -1.51142 | 0.53500  |
| H | -0.75727 | -3.24779 | 0.71118  |
| H | -4.89951 | -2.20188 | -1.23818 |
| H | 1.40017  | -2.05401 | 0.74740  |

**Fig. S36** Optimized geometry, total energy, and Cartesian coordinates of N, S co-doped coronene at M06-2X level of theory with 6-31G(d, p) basis set.

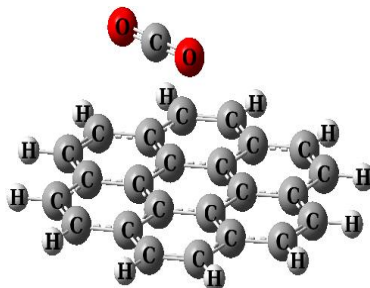

**E = -1110.0592831720 au**

|   |          |          |          |
|---|----------|----------|----------|
| C | -5.63534 | 1.62403  | -0.92824 |
| C | -5.60083 | 0.31034  | -0.55556 |
| C | -4.43876 | 2.38566  | -1.05183 |
| C | -4.36701 | -0.34391 | -0.27848 |
| C | -3.20097 | 1.76043  | -0.78599 |
| C | -3.16488 | 0.38709  | -0.39721 |
| C | -1.98793 | 2.50368  | -0.88962 |
| C | -0.73973 | 1.87406  | -0.60901 |
| C | -0.70362 | 0.50220  | -0.22210 |
| C | -1.91566 | -0.24111 | -0.11516 |
| C | 0.45987  | 2.60992  | -0.71225 |
| C | 0.53184  | -0.12006 | 0.05689  |
| C | -1.88083 | -1.59753 | 0.27405  |
| C | -2.02461 | 3.86371  | -1.26593 |
| C | -4.30378 | -1.71049 | 0.11699  |
| C | -4.44756 | 3.75874  | -1.42935 |
| C | -3.10671 | -2.31403 | 0.38146  |
| C | -0.62119 | -2.20204 | 0.54888  |
| C | 0.54040  | -1.49067 | 0.44357  |
| H | 1.49478  | -1.96380 | 0.65691  |
| C | 1.72812  | 0.64373  | -0.05700 |
| C | -3.28523 | 4.46968  | -1.53308 |
| C | -0.79989 | 4.58363  | -1.36316 |
| C | 0.39629  | 3.97947  | -1.09745 |
| C | 1.69342  | 1.95842  | -0.42726 |
| H | -0.83411 | 5.62969  | -1.65431 |
| H | 1.32342  | 4.54036  | -1.17526 |
| H | -6.52199 | -0.25725 | -0.45946 |
| H | -6.58422 | 2.11208  | -1.13152 |
| H | 2.61354  | 2.53014  | -0.50914 |
| H | 2.67610  | 0.15902  | 0.15882  |
| H | -5.40248 | 4.23482  | -1.63308 |
| H | -5.23157 | -2.26840 | 0.20636  |
| H | -3.07329 | -3.35730 | 0.68267  |

|   |          |          |          |
|---|----------|----------|----------|
| H | -0.60051 | -3.24652 | 0.84689  |
| H | -3.30675 | 5.51697  | -1.82110 |
| C | -3.41262 | 1.88892  | 2.27765  |
| O | -2.25190 | 1.92017  | 2.34737  |
| O | -4.57456 | 1.86316  | 2.22650  |

**Fig. S37** Optimized geometry, total energy, and Cartesian coordinates of Fig. 12(a) at M06-2X level of theory with 6-31G(d, p) basis set.

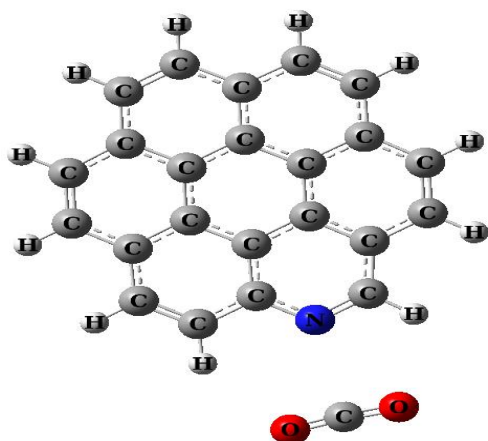

**E = -1126.0981407474 au**

|   |          |          |          |
|---|----------|----------|----------|
| C | -5.64088 | 1.63853  | -0.80807 |
| C | -5.60766 | 0.31484  | -0.46243 |
| C | -4.43482 | 2.38421  | -0.92589 |
| C | -4.37390 | -0.35733 | -0.21055 |
| C | -3.21042 | 1.74207  | -0.68117 |
| C | -3.17012 | 0.36728  | -0.32198 |
| C | -2.01090 | 2.48892  | -0.79927 |
| C | -0.75489 | 1.86918  | -0.55870 |
| C | -0.70699 | 0.49111  | -0.19867 |
| C | -1.91428 | -0.25968 | -0.08070 |
| C | 0.42998  | 2.62215  | -0.67908 |
| C | 0.53648  | -0.12904 | 0.03984  |
| C | -1.87036 | -1.62340 | 0.27419  |
| C | -2.08601 | 3.84704  | -1.15825 |
| C | -4.30215 | -1.73390 | 0.14980  |
| C | -4.38555 | 3.76467  | -1.28420 |
| C | -3.09772 | -2.33981 | 0.38200  |
| C | -0.60198 | -2.22788 | 0.51001  |
| C | 0.55547  | -1.50860 | 0.39725  |
| H | 1.51484  | -1.98416 | 0.58043  |
| C | 1.72388  | 0.64961  | -0.08661 |
| N | -3.28577 | 4.46434  | -1.39709 |
| C | -0.87896 | 4.59354  | -1.27576 |
| C | 0.33111  | 3.99755  | -1.04320 |
| C | 1.67359  | 1.97208  | -0.43197 |



|   |          |          |          |
|---|----------|----------|----------|
| H | -0.95789 | 5.63902  | -1.55421 |
| H | 1.24707  | 4.57452  | -1.13518 |
| H | -6.53117 | -0.25006 | -0.37386 |
| H | -6.58797 | 2.13578  | -0.99682 |
| H | 2.58968  | 2.54869  | -0.52341 |
| H | 2.68060  | 0.16928  | 0.09802  |
| H | -5.31668 | 4.29556  | -1.48365 |
| H | -5.22529 | -2.29943 | 0.23796  |
| H | -3.06082 | -3.39057 | 0.65579  |
| H | -0.56931 | -3.27871 | 0.78340  |
| C | -3.82638 | 6.99562  | -2.16722 |
| O | -2.71586 | 7.34126  | -2.19797 |
| O | -4.95993 | 6.73127  | -2.16209 |

**Fig. S38** Optimized geometry, total energy, and Cartesian coordinates of Fig. 12(b) at M06-2X level of theory with 6-31G(d, p) basis set.

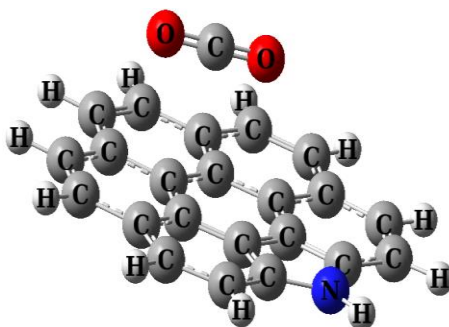

**E = -1087.9632137127 au**

|   |          |          |          |
|---|----------|----------|----------|
| C | -5.71362 | 1.68238  | -1.43463 |
| C | -5.73555 | 0.38536  | -0.91092 |
| C | -4.47830 | 2.37430  | -1.47883 |
| C | -4.58887 | -0.30077 | -0.39833 |
| C | -3.38958 | 1.66656  | -1.00251 |
| C | -3.37537 | 0.39682  | -0.45918 |
| C | -2.26078 | 2.46644  | -1.06235 |
| C | -1.03048 | 2.05605  | -0.58565 |
| C | -0.95979 | 0.74766  | -0.02425 |
| C | -2.12902 | -0.07796 | 0.03994  |
| C | 0.02967  | 2.97225  | -0.63642 |
| C | 0.26445  | 0.31476  | 0.50504  |
| C | -2.08564 | -1.34930 | 0.62851  |
| C | -2.60256 | 3.70536  | -1.57507 |
| C | -4.50837 | -1.60592 | 0.19607  |
| N | -3.98235 | 3.64026  | -1.84553 |
| C | -3.31766 | -2.09457 | 0.67710  |
| C | -0.82852 | -1.78341 | 1.14450  |
| C | 0.29532  | -0.98742 | 1.08629  |
| H | 1.23054  | -1.35354 | 1.50115  |

|   |          |          |          |
|---|----------|----------|----------|
| C | 1.37429  | 1.23002  | 0.43303  |
| C | -1.54221 | 4.64246  | -1.64354 |
| C | -0.27694 | 4.25786  | -1.18603 |
| C | 1.27286  | 2.49118  | -0.10188 |
| H | -1.68023 | 5.64744  | -2.02838 |
| H | 0.52102  | 4.99306  | -1.24218 |
| H | -6.69344 | -0.12662 | -0.88150 |
| H | -6.64031 | 2.12606  | -1.78309 |
| H | 2.14577  | 3.13799  | -0.10997 |
| H | 2.32855  | 0.90432  | 0.83797  |
| H | -4.53469 | 4.39134  | -2.22452 |
| H | -5.40443 | -2.21559 | 0.27418  |
| H | -3.29620 | -3.08410 | 1.12581  |
| H | -0.76231 | -2.76587 | 1.60428  |
| C | -1.72797 | 2.54746  | 2.37085  |
| O | -0.60667 | 2.70720  | 2.63606  |
| O | -2.85534 | 2.39605  | 2.12662  |

**Fig. S39** Optimized geometry, total energy, and Cartesian coordinates of Fig. 12(c) at M06-2X level of theory with 6-31G(d, p) basis set.

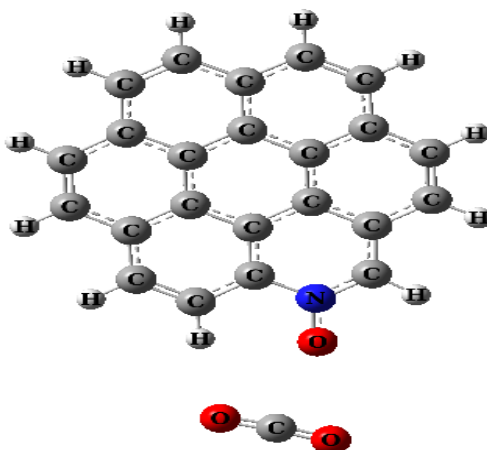

**E = -1201.2274240666 au**

|   |          |          |          |
|---|----------|----------|----------|
| C | -5.71526 | 1.52858  | -0.78852 |
| C | -5.62929 | 0.20993  | -0.43386 |
| C | -4.53687 | 2.31810  | -0.92509 |
| C | -4.37310 | -0.41882 | -0.18975 |
| C | -3.28950 | 1.71580  | -0.68881 |
| C | -3.19770 | 0.34909  | -0.32085 |
| C | -2.11815 | 2.50500  | -0.82572 |
| C | -0.83684 | 1.93114  | -0.59444 |
| C | -0.74008 | 0.55781  | -0.22418 |
| C | -1.91875 | -0.23313 | -0.08725 |
| C | 0.32293  | 2.72127  | -0.73234 |
| C | 0.52630  | -0.01761 | 0.00691  |
| C | -1.82458 | -1.59131 | 0.27916  |

|   |          |          |          |
|---|----------|----------|----------|
| C | -2.20534 | 3.85384  | -1.18823 |
| C | -4.25045 | -1.78827 | 0.18130  |
| C | -4.57177 | 3.68309  | -1.28851 |
| C | -3.02432 | -2.35094 | 0.40657  |
| C | -0.53411 | -2.14904 | 0.50719  |
| C | 0.59683  | -1.39131 | 0.37597  |
| H | 1.57381  | -1.83176 | 0.55333  |
| C | 1.68662  | 0.79833  | -0.13798 |
| N | -3.46840 | 4.42698  | -1.41775 |
| C | -1.04750 | 4.65168  | -1.32818 |
| C | 0.18120  | 4.08823  | -1.10328 |
| C | 1.59076  | 2.11438  | -0.49313 |
| H | -1.16854 | 5.69025  | -1.60882 |
| H | 1.07680  | 4.69347  | -1.20788 |
| H | -6.53340 | -0.38351 | -0.33221 |
| H | -6.68196 | 1.98810  | -0.96975 |
| H | 2.48562  | 2.72069  | -0.59873 |
| H | 2.66015  | 0.35073  | 0.04085  |
| H | -5.48732 | 4.22443  | -1.48824 |
| H | -5.15303 | -2.38386 | 0.28368  |
| H | -2.94764 | -3.39701 | 0.68907  |
| H | -0.46200 | -3.19545 | 0.78955  |
| O | -3.54435 | 5.65501  | -1.74866 |
| C | -2.80853 | 8.14107  | -2.13060 |
| O | -3.92585 | 8.41817  | -2.27844 |
| O | -1.67061 | 7.92914  | -1.99351 |

**Fig. S40** Optimized geometry, total energy, and Cartesian coordinates of Fig. 12(d) at M06-2X level of theory with 6-31G(d, p) basis set.

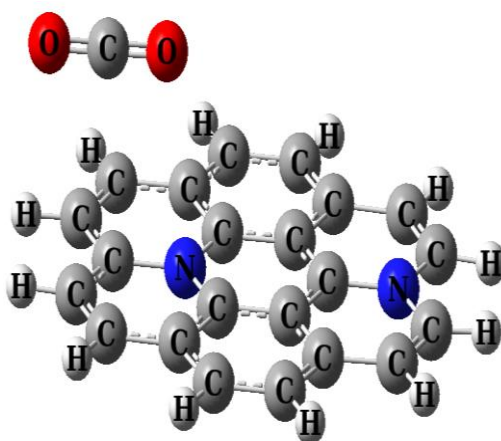

**E = -1143.2200291133 au**

|   |          |          |          |
|---|----------|----------|----------|
| C | -5.46028 | 1.68598  | -0.36374 |
| C | -5.49410 | 0.35189  | -0.12412 |
| C | -4.26279 | 2.39868  | -0.56379 |
| C | -4.25752 | -0.38556 | -0.07573 |
| N | -3.02877 | 1.69280  | -0.50335 |

|   |          |          |          |
|---|----------|----------|----------|
| C | -3.02999 | 0.32600  | -0.26377 |
| C | -1.83423 | 2.38167  | -0.66005 |
| C | -0.59558 | 1.68492  | -0.60376 |
| C | -0.59359 | 0.30057  | -0.37857 |
| C | -1.80191 | -0.38958 | -0.20484 |
| C | 0.63832  | 2.40017  | -0.77426 |
| N | 0.61625  | -0.39260 | -0.32412 |
| C | -1.80803 | -1.80604 | 0.03341  |
| C | -1.82515 | 3.79556  | -0.88091 |
| C | -4.21576 | -1.75636 | 0.15346  |
| C | -4.23677 | 3.78863  | -0.78665 |
| C | -3.00344 | -2.45979 | 0.20578  |
| C | -0.50948 | -2.46532 | 0.07708  |
| C | 0.62025  | -1.77257 | -0.09504 |
| C | 1.82275  | 0.29468  | -0.49472 |
| C | -3.08579 | 4.49158  | -0.93214 |
| C | -0.60743 | 4.44753  | -1.03795 |
| C | 0.61217  | 3.75670  | -0.98631 |
| C | 1.86267  | 1.61322  | -0.70824 |
| H | -0.61929 | 5.51914  | -1.20464 |
| H | 1.54691  | 4.29454  | -1.11419 |
| H | -6.42651 | -0.17725 | 0.03057  |
| H | -6.37442 | 2.27034  | -0.40215 |
| H | 2.81884  | 2.10691  | -0.83463 |
| H | 2.70684  | -0.32826 | -0.43824 |
| H | -5.20210 | 4.28447  | -0.81732 |
| H | -5.15516 | -2.27967 | 0.29465  |
| H | -3.00417 | -3.53072 | 0.38594  |
| H | -0.46168 | -3.53349 | 0.25227  |
| H | -3.08753 | 5.56196  | -1.09866 |
| H | 1.60557  | -2.22133 | -0.06999 |
| C | -4.15724 | 3.36914  | 2.23684  |
| O | -5.21929 | 3.84396  | 2.25894  |
| O | -3.09227 | 2.90072  | 2.24771  |

**Fig. S41** Optimized geometry, total energy, and Cartesian coordinates of Fig. 12(e) at M06-2X level of theory with 6-31G(d, p) basis set.

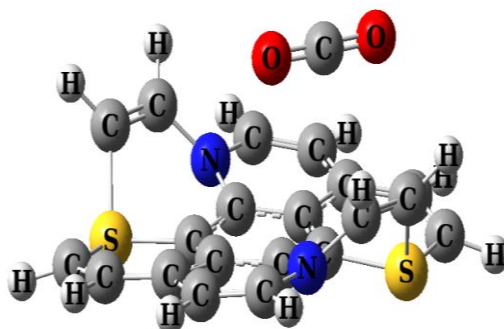

**E = -1863.1079686032 au**

|   |          |          |          |
|---|----------|----------|----------|
| C | -5.81453 | 1.90862  | -0.14145 |
| C | -5.97888 | 0.63976  | 0.40882  |
| C | -4.62395 | 2.55481  | -0.41249 |
| S | -4.66146 | -0.40396 | 0.75009  |
| C | -3.36299 | 1.91287  | -0.12785 |
| C | -3.24310 | 0.59172  | 0.34092  |
| C | -2.14735 | 2.58647  | -0.34837 |
| C | -0.93852 | 1.96982  | -0.02623 |
| C | -0.82169 | 0.58252  | 0.19014  |
| C | -2.03952 | -0.10993 | 0.32932  |
| S | 0.48548  | 3.02848  | -0.17810 |
| C | 0.43656  | -0.12711 | 0.22010  |
| N | -2.05107 | -1.52503 | 0.30917  |
| N | -2.14638 | 3.82207  | -1.03915 |
| C | -4.32028 | -1.69504 | -0.46610 |
| C | -4.54984 | 3.91411  | -0.89285 |
| C | -3.06908 | -2.17213 | -0.38740 |
| C | -0.81249 | -2.20706 | 0.48149  |
| C | 1.62935  | 0.56235  | 0.12371  |
| C | -3.38553 | 4.50983  | -1.18284 |
| C | -1.14990 | 4.05734  | -1.98016 |
| C | 0.10096  | 3.58251  | -1.85792 |
| C | 1.79579  | 1.94029  | 0.00364  |
| H | -1.47242 | 4.63180  | -2.84569 |
| H | 0.88619  | 3.66400  | -2.59650 |
| H | -6.91857 | 0.28354  | 0.80227  |
| H | -6.73345 | 2.47249  | -0.29652 |
| H | 2.74364  | 2.43581  | 0.14762  |
| H | 2.54800  | -0.01243 | 0.23201  |
| H | -5.46778 | 4.48393  | -1.00024 |
| H | -2.76048 | -3.08104 | -0.89858 |
| H | -3.29534 | 5.53702  | -1.51046 |
| C | 0.35585  | -1.55241 | 0.43620  |
| H | -0.90539 | -3.26724 | 0.67648  |
| H | -5.11998 | -2.10525 | -1.06639 |
| H | 1.27328  | -2.11208 | 0.59048  |
| C | -0.77668 | 0.69643  | -2.88961 |
| O | 0.38479  | 0.69052  | -2.95386 |
| O | -1.94005 | 0.69330  | -2.84965 |

**Fig. S42** Optimized geometry, total energy, and Cartesian coordinates of Fig. 12(f) at M06-2X level of theory with 6-31G(d, p) basis set.

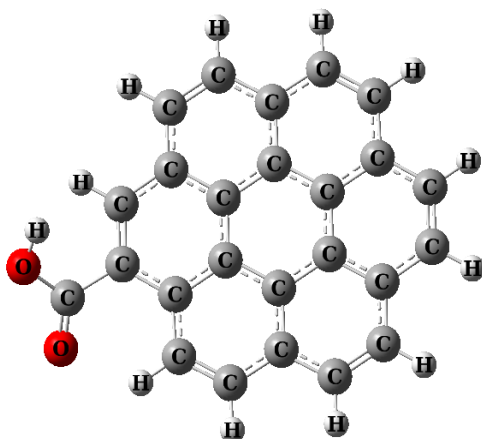

**E = -1110.0449274228 au**

|   |          |          |          |
|---|----------|----------|----------|
| C | -5.61078 | 1.60321  | -0.80842 |
| C | -5.58020 | 0.26725  | -0.49100 |
| C | -4.42653 | 2.37461  | -0.92560 |
| C | -4.33095 | -0.40317 | -0.26824 |
| C | -3.18624 | 1.74600  | -0.68962 |
| C | -3.14040 | 0.35748  | -0.35753 |
| C | -1.98269 | 2.50488  | -0.78880 |
| C | -0.72459 | 1.88044  | -0.54867 |
| C | -0.67257 | 0.49682  | -0.21215 |
| C | -1.87655 | -0.26288 | -0.11832 |
| C | 0.46649  | 2.63165  | -0.64453 |
| C | 0.57439  | -0.12109 | 0.02538  |
| C | -1.81474 | -1.63270 | 0.21264  |
| C | -2.03701 | 3.87550  | -1.12495 |
| C | -4.23909 | -1.78571 | 0.06887  |
| C | -4.45743 | 3.75603  | -1.26881 |
| C | -3.02607 | -2.37034 | 0.29968  |
| C | -0.54534 | -2.23330 | 0.44863  |
| C | 0.60615  | -1.50505 | 0.35875  |
| H | 1.56907  | -1.97386 | 0.54032  |
| C | 1.76158  | 0.65826  | -0.07662 |
| C | -3.30385 | 4.47997  | -1.36397 |
| C | -0.82164 | 4.61108  | -1.21615 |
| C | 0.38394  | 4.01170  | -0.98415 |
| C | 1.71044  | 1.98474  | -0.39938 |
| H | -0.87049 | 5.66466  | -1.47573 |
| H | 1.30413  | 4.58440  | -1.05721 |
| C | -6.88083 | -0.48307 | -0.43989 |
| H | -6.55989 | 2.09115  | -1.02092 |
| H | 2.62375  | 2.56791  | -0.47463 |
| H | 2.71662  | 0.17465  | 0.10775  |
| H | -5.41930 | 4.22561  | -1.45382 |
| H | -5.14601 | -2.37313 | 0.12334  |
| H | -2.97419 | -3.42529 | 0.55353  |
| H | -0.51086 | -3.28879 | 0.70262  |

|   |          |          |          |
|---|----------|----------|----------|
| H | -3.33606 | 5.53383  | -1.62485 |
| O | -7.03855 | -1.60747 | -0.83317 |
| O | -7.92591 | 0.21016  | 0.06551  |
| H | -7.60807 | 1.02215  | 0.47955  |

**Fig. S43** Optimized geometry, total energy, and Cartesian coordinates of -COOH functionalized coronene at M06-2X level of theory with 6-31G(d, p) basis set.

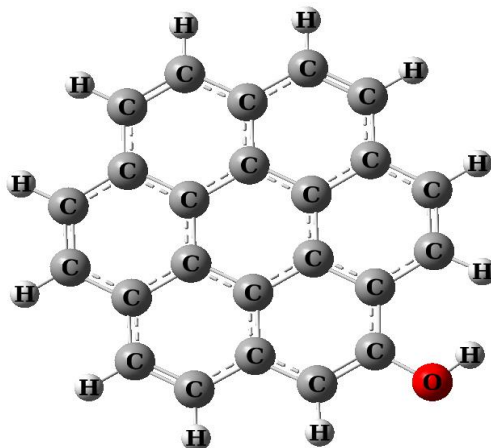

**E = -996.7388837878 au**

|   |          |          |          |
|---|----------|----------|----------|
| C | -5.64952 | 1.64839  | -0.84748 |
| C | -5.61060 | 0.33030  | -0.48874 |
| C | -4.45398 | 2.41351  | -0.95575 |
| C | -4.37623 | -0.32139 | -0.21151 |
| C | -3.21625 | 1.78984  | -0.68589 |
| C | -3.17636 | 0.41513  | -0.31165 |
| C | -2.00421 | 2.53328  | -0.78700 |
| C | -0.75305 | 1.90288  | -0.51413 |
| C | -0.71263 | 0.52525  | -0.13885 |
| C | -1.92713 | -0.21398 | -0.03916 |
| C | 0.44197  | 2.64699  | -0.61688 |
| C | 0.53035  | -0.09358 | 0.13053  |
| C | -1.88662 | -1.57559 | 0.33170  |
| C | -2.04279 | 3.89539  | -1.15768 |
| C | -4.30869 | -1.69331 | 0.16427  |
| C | -4.46404 | 3.78801  | -1.32743 |
| C | -3.11219 | -2.29744 | 0.42568  |
| C | -0.63617 | -2.18521 | 0.59949  |
| C | 0.53261  | -1.47711 | 0.50474  |
| O | 1.68551  | -2.14122 | 0.77988  |
| C | 1.71902  | 0.68246  | 0.01848  |
| C | -3.30310 | 4.50142  | -1.42460 |
| C | -0.82133 | 4.62002  | -1.25304 |
| C | 0.37680  | 4.01867  | -0.99253 |
| C | 1.67697  | 1.99979  | -0.34076 |
| H | -0.85965 | 5.66740  | -1.53891 |
| H | 1.30301  | 4.58113  | -1.06841 |

|   |          |          |          |
|---|----------|----------|----------|
| H | -6.52948 | -0.24394 | -0.40925 |
| H | -6.59844 | 2.13397  | -1.05644 |
| H | 2.59566  | 2.57357  | -0.42033 |
| H | 2.69326  | 0.24300  | 0.21715  |
| H | -5.41898 | 4.26300  | -1.53406 |
| H | -5.23450 | -2.25683 | 0.24032  |
| H | -3.07625 | -3.34465 | 0.71140  |
| H | -0.58709 | -3.23054 | 0.88611  |
| H | -3.32471 | 5.54958  | -1.70930 |
| H | 2.44277  | -1.55611 | 0.68453  |

**Fig. S44** Optimized geometry, total energy, and Cartesian coordinates of -OH functionalized coronene at M06-2X level of theory with 6-31G(d, p) basis set.

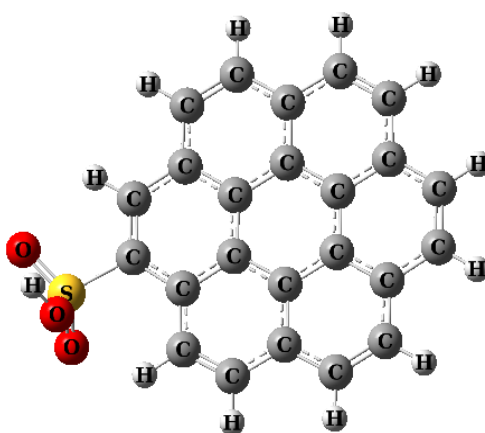

**E = -1545.2282277791 au**

|   |          |          |          |
|---|----------|----------|----------|
| C | -5.66039 | 1.65712  | -0.87604 |
| C | -5.62394 | 0.33671  | -0.52453 |
| C | -4.46000 | 2.40664  | -0.98398 |
| C | -4.40359 | -0.36055 | -0.25216 |
| C | -3.23203 | 1.76659  | -0.71344 |
| C | -3.20477 | 0.38529  | -0.34632 |
| C | -2.01811 | 2.50916  | -0.80697 |
| C | -0.77116 | 1.87594  | -0.53266 |
| C | -0.73949 | 0.49957  | -0.16555 |
| C | -1.95307 | -0.24432 | -0.07326 |
| C | 0.42976  | 2.61153  | -0.62378 |
| C | 0.49597  | -0.12689 | 0.10660  |
| C | -1.91314 | -1.60662 | 0.29071  |
| C | -2.05115 | 3.87377  | -1.17074 |
| C | -4.33683 | -1.73598 | 0.11415  |
| C | -4.47012 | 3.78191  | -1.35041 |
| C | -3.13368 | -2.32852 | 0.37494  |
| C | -0.65472 | -2.21643 | 0.56002  |
| C | 0.50622  | -1.50342 | 0.47152  |
| H | 1.46060  | -1.97882 | 0.67897  |
| C | 1.69337  | 0.63677  | 0.00783  |



|   |          |          |          |
|---|----------|----------|----------|
| C | -3.30595 | 4.48957  | -1.44054 |
| C | -0.82568 | 4.59355  | -1.25630 |
| C | 0.36868  | 3.98536  | -0.99270 |
| C | 1.66204  | 1.95653  | -0.34406 |
| H | -0.85830 | 5.64223  | -1.53713 |
| H | 1.29651  | 4.54610  | -1.06172 |
| S | -7.18947 | -0.49562 | -0.43111 |
| H | -6.61621 | 2.13334  | -1.07112 |
| H | 2.58284  | 2.52818  | -0.41619 |
| H | 2.63969  | 0.14706  | 0.21881  |
| H | -5.42396 | 4.25785  | -1.55738 |
| H | -5.24632 | -2.32119 | 0.17424  |
| H | -3.09843 | -3.37833 | 0.65114  |
| H | -0.63645 | -3.26612 | 0.83835  |
| H | -3.32065 | 5.53874  | -1.72088 |
| O | -7.14985 | -1.70874 | -1.21169 |
| O | -8.24758 | 0.48318  | -0.59697 |
| O | -7.22849 | -0.96965 | 1.11811  |
| H | -7.75286 | -0.32022 | 1.61258  |

**Fig. S45** Optimized geometry, total energy, and Cartesian coordinates of -SO<sub>3</sub>H functionalized coronene at M06-2X level of theory with 6-31G(d, p) basis set.

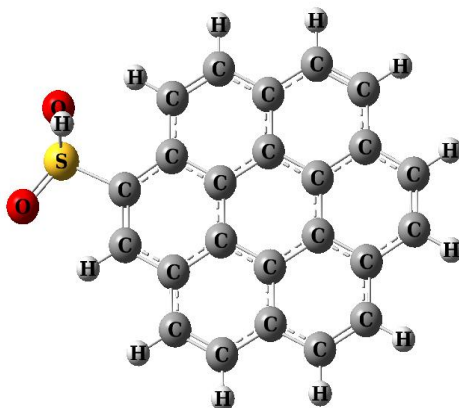

**E = -1470.0402530163 au**

|   |          |          |          |
|---|----------|----------|----------|
| C | -5.63185 | 1.74839  | -0.56879 |
| C | -5.59845 | 0.41514  | -0.27766 |
| C | -4.42647 | 2.48257  | -0.73724 |
| C | -4.37307 | -0.30158 | -0.10765 |
| C | -3.19370 | 1.81447  | -0.57463 |
| C | -3.16718 | 0.42169  | -0.25650 |
| C | -1.97386 | 2.53713  | -0.72561 |
| C | -0.72426 | 1.87198  | -0.55681 |
| C | -0.69520 | 0.48329  | -0.23738 |
| C | -1.91483 | -0.24122 | -0.08857 |
| C | 0.48266  | 2.58829  | -0.70432 |
| C | 0.54225  | -0.17452 | -0.06816 |

|   |          |          |          |
|---|----------|----------|----------|
| C | -1.88054 | -1.61634 | 0.22653  |
| C | -2.00334 | 3.91342  | -1.04145 |
| C | -4.31142 | -1.69178 | 0.19880  |
| C | -4.43145 | 3.87016  | -1.05446 |
| C | -3.10845 | -2.31892 | 0.36420  |
| C | -0.61958 | -2.25730 | 0.39246  |
| C | 0.54746  | -1.56259 | 0.25091  |
| H | 1.50333  | -2.06225 | 0.37976  |
| C | 1.74561  | 0.57053  | -0.22168 |
| C | -3.26158 | 4.55956  | -1.20262 |
| C | -0.77148 | 4.61289  | -1.18676 |
| C | 0.42531  | 3.97472  | -1.02403 |
| C | 1.71710  | 1.90173  | -0.52843 |
| H | -0.80109 | 5.67100  | -1.43032 |
| H | 1.35771  | 4.52056  | -1.13698 |
| S | -7.19000 | -0.40364 | -0.01321 |
| H | -6.59642 | 2.24066  | -0.66520 |
| H | 2.64256  | 2.45881  | -0.64316 |
| H | 2.69407  | 0.05772  | -0.08981 |
| H | -5.38718 | 4.37119  | -1.17595 |
| H | -5.22920 | -2.26232 | 0.28704  |
| H | -3.07702 | -3.37873 | 0.60013  |
| H | -3.27475 | 5.61820  | -1.44523 |
| O | -8.20032 | 0.63076  | -0.33574 |
| O | -7.07488 | -1.47062 | -1.27193 |
| H | -0.60364 | -3.31595 | 0.63500  |
| H | -6.92376 | -0.97703 | -2.09585 |

**Fig. S46** Optimized geometry, total energy, and Cartesian coordinates of -SO<sub>2</sub>H functionalized coronene at M06-2X level of theory with 6-31G(d, p) basis set.

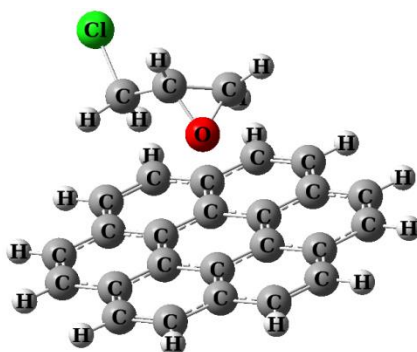

**E = -1574.1449956670 au**

|   |          |          |          |
|---|----------|----------|----------|
| C | -5.59341 | 1.75455  | -0.65388 |
| C | -5.54689 | 0.49323  | -0.13079 |
| C | -4.40168 | 2.49544  | -0.89617 |
| C | -4.30333 | -0.12461 | 0.18517  |
| C | -3.15725 | 1.90554  | -0.58991 |
| C | -3.10764 | 0.58686  | -0.05198 |

|    |          |          |          |
|----|----------|----------|----------|
| C  | -1.95067 | 2.63135  | -0.81098 |
| C  | -0.69389 | 2.03930  | -0.49319 |
| C  | -0.64230 | 0.71814  | 0.03980  |
| C  | -1.85010 | -0.00719 | 0.26387  |
| C  | 0.50033  | 2.76093  | -0.70479 |
| C  | 0.60259  | 0.13114  | 0.35483  |
| C  | -1.80058 | -1.30791 | 0.81195  |
| C  | -2.00059 | 3.93758  | -1.34120 |
| C  | -4.22708 | -1.43344 | 0.74359  |
| C  | -4.42528 | 3.81410  | -1.43342 |
| C  | -3.02243 | -2.00346 | 1.04685  |
| C  | -0.53158 | -1.87866 | 1.12014  |
| C  | 0.62603  | -1.18589 | 0.89727  |
| H  | 1.58659  | -1.63087 | 1.14100  |
| C  | 1.79317  | 0.88217  | 0.13681  |
| C  | -3.26866 | 4.50830  | -1.64852 |
| C  | -0.78150 | 4.64362  | -1.54896 |
| C  | 0.42330  | 4.07767  | -1.24124 |
| C  | 1.74301  | 2.14873  | -0.37352 |
| H  | -0.82701 | 5.64930  | -1.95735 |
| H  | 1.34607  | 4.62786  | -1.40242 |
| H  | -6.46368 | -0.06006 | 0.05255  |
| H  | -6.54834 | 2.21507  | -0.89130 |
| H  | 2.65827  | 2.71102  | -0.53620 |
| H  | 2.74770  | 0.42643  | 0.38452  |
| H  | -5.38662 | 4.26186  | -1.66912 |
| H  | -5.15128 | -1.97467 | 0.92613  |
| H  | -2.97820 | -3.00203 | 1.47232  |
| H  | -0.49996 | -2.87912 | 1.54208  |
| H  | -3.30000 | 5.51436  | -2.05726 |
| O  | -2.31182 | 2.29264  | 2.36066  |
| C  | -3.07701 | 1.40734  | 3.16846  |
| C  | -1.77353 | 1.91272  | 3.61314  |
| H  | -3.14510 | 0.38368  | 2.79928  |
| H  | -3.98925 | 1.83040  | 3.58150  |
| H  | -1.73418 | 2.70190  | 4.36321  |
| C  | -0.55687 | 1.03505  | 3.51653  |
| H  | -0.72252 | 0.22809  | 2.80309  |
| Cl | -0.20796 | 0.28778  | 5.11305  |
| H  | 0.32655  | 1.60390  | 3.22183  |

**Fig. S47** Optimized geometry, total energy, and Cartesian coordinates of Fig. 13(a) at M06-2X

level of theory with 6-31G(d, p) basis set.

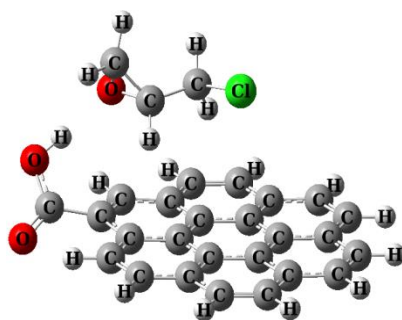

**E = -1762.6546277582 au**

|   |          |          |          |
|---|----------|----------|----------|
| C | -5.55582 | 1.63094  | -0.51228 |
| C | -5.51438 | 0.27941  | -0.28188 |
| C | -4.37367 | 2.40251  | -0.64492 |
| C | -4.26214 | -0.41610 | -0.21214 |
| C | -3.12644 | 1.76025  | -0.48518 |
| C | -3.07143 | 0.34766  | -0.28092 |
| C | -1.92652 | 2.53121  | -0.51518 |
| C | -0.66467 | 1.89129  | -0.34489 |
| C | -0.60408 | 0.48063  | -0.15430 |
| C | -1.80384 | -0.28997 | -0.12361 |
| C | 0.52175  | 2.65499  | -0.36539 |
| C | 0.64673  | -0.15291 | 0.00993  |
| C | -1.73682 | -1.68510 | 0.07345  |
| C | -1.98930 | 3.92906  | -0.70643 |
| C | -4.16581 | -1.82559 | -0.01453 |
| C | -4.41244 | 3.81125  | -0.85547 |
| C | -2.94736 | -2.42996 | 0.11562  |
| C | -0.46296 | -2.30179 | 0.22933  |
| C | 0.68563  | -1.56348 | 0.19915  |
| H | 1.65176  | -2.04460 | 0.32190  |
| C | 1.82963  | 0.63921  | -0.01661 |
| C | -3.26146 | 4.54711  | -0.88155 |
| C | -0.77835 | 4.67723  | -0.72087 |
| C | 0.43072  | 4.06282  | -0.55604 |
| C | 1.77019  | 1.99213  | -0.19618 |
| H | -0.83343 | 5.75204  | -0.86759 |
| H | 1.34774  | 4.64499  | -0.56946 |
| C | -6.81003 | -0.43816 | -0.01682 |
| H | -6.51510 | 2.14056  | -0.56096 |
| H | 2.68019  | 2.58498  | -0.21266 |
| H | 2.78805  | 0.14410  | 0.11101  |
| H | -5.37846 | 4.29138  | -0.98174 |
| H | -5.07693 | -2.41022 | 0.01140  |
| H | -2.88932 | -3.50525 | 0.25897  |
| H | -0.42211 | -3.37720 | 0.37631  |
| H | -3.29997 | 5.62178  | -1.03519 |
| O | -7.11017 | -1.50112 | -0.49611 |
| O | -7.63737 | 0.20611  | 0.82157  |
| H | -7.18086 | 0.95211  | 1.25768  |

|    |          |         |         |
|----|----------|---------|---------|
| O  | -6.18835 | 2.08685 | 2.40643 |
| C  | -5.81073 | 1.46983 | 3.64219 |
| C  | -4.81003 | 1.79510 | 2.62135 |
| C  | -3.93098 | 3.00984 | 2.74036 |
| H  | -4.40794 | 0.98850 | 2.01109 |
| H  | -6.14083 | 0.44073 | 3.75609 |
| H  | -5.91176 | 2.10812 | 4.51648 |
| H  | -4.33860 | 3.72037 | 3.46085 |
| H  | -3.80653 | 3.49774 | 1.77219 |
| Cl | -2.30414 | 2.50913 | 3.29689 |

**Fig. S48** Optimized geometry, total energy, and Cartesian coordinates of Fig. 13(b) at M06-2X level of theory with 6-31G(d, p) basis set.

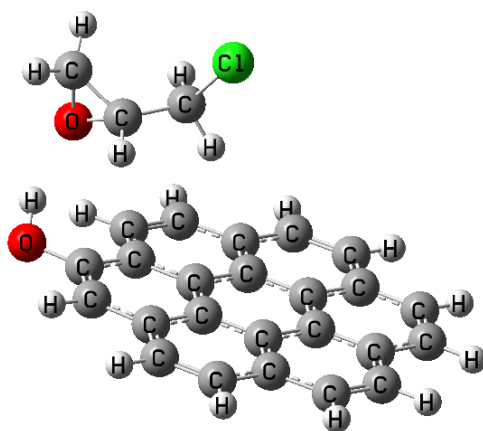

**E = -1649.3470642911 au**

|   |          |          |          |
|---|----------|----------|----------|
| C | -5.22773 | 1.69906  | -1.51537 |
| C | -5.32531 | 0.40412  | -1.09061 |
| C | -3.98474 | 2.39299  | -1.47456 |
| C | -4.18898 | -0.29630 | -0.59570 |
| C | -2.84302 | 1.72093  | -0.98702 |
| C | -2.94485 | 0.36870  | -0.54705 |
| C | -1.58812 | 2.39558  | -0.92902 |
| C | -0.43475 | 1.71808  | -0.43107 |
| C | -0.53437 | 0.35931  | -0.00293 |
| C | -1.79167 | -0.31148 | -0.06004 |
| C | 0.80293  | 2.39553  | -0.35714 |
| C | 0.61324  | -0.30913 | 0.47832  |
| C | -1.88805 | -1.65074 | 0.37508  |
| C | -1.48779 | 3.73620  | -1.35902 |
| C | -4.26217 | -1.64554 | -0.14751 |
| C | -3.85485 | 3.74340  | -1.90654 |
| C | -3.15624 | -2.29810 | 0.31942  |
| C | -0.71779 | -2.32321 | 0.81724  |
| C | 0.49663  | -1.68962 | 0.85287  |
| O | 1.58968  | -2.38885 | 1.26071  |
| C | 1.84116  | 0.40470  | 0.57679  |

|    |          |          |          |
|----|----------|----------|----------|
| C  | -2.65256 | 4.39032  | -1.85102 |
| C  | -0.22580 | 4.39195  | -1.28301 |
| C  | 0.87691  | 3.74786  | -0.79879 |
| C  | 1.93181  | 1.70689  | 0.16894  |
| H  | -0.15628 | 5.42363  | -1.61626 |
| H  | 1.83226  | 4.26150  | -0.73946 |
| H  | -6.27955 | -0.11415 | -1.12516 |
| H  | -6.10254 | 2.22176  | -1.89144 |
| H  | 2.87450  | 2.24037  | 0.25167  |
| H  | 2.71140  | -0.09607 | 0.98606  |
| H  | -4.73622 | 4.25493  | -2.28294 |
| H  | -5.22209 | -2.15309 | -0.18468 |
| H  | -3.22785 | -3.32837 | 0.65570  |
| H  | -0.76625 | -3.36587 | 1.11455  |
| H  | -2.56779 | 5.42134  | -2.18256 |
| H  | 2.33107  | -2.18284 | 0.66523  |
| O  | 3.09803  | -1.74297 | -1.01720 |
| C  | 2.09227  | -1.71413 | -2.02794 |
| C  | 3.28236  | -2.55754 | -2.17599 |
| C  | 1.98286  | -0.40716 | -2.76243 |
| H  | 1.15116  | -2.18764 | -1.75086 |
| H  | 3.20288  | -3.62732 | -2.00635 |
| H  | 4.08380  | -2.23078 | -2.83433 |
| H  | 2.96226  | 0.06902  | -2.82520 |
| H  | 1.27501  | 0.26812  | -2.27956 |
| Cl | 1.39304  | -0.70259 | -4.43120 |

**Fig. S49** Optimized geometry, total energy, and Cartesian coordinates of Fig. 13(c) at M06-2X level of theory with 6-31G(d, p) basis set.

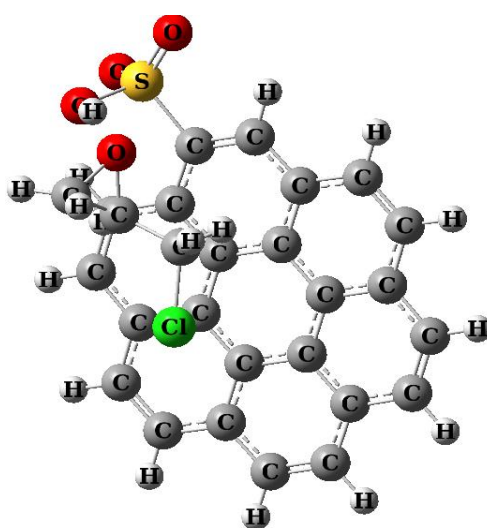

**E = -2197.8398806244 au**

|   |          |         |          |
|---|----------|---------|----------|
| C | -5.90198 | 1.54678 | -0.85386 |
|---|----------|---------|----------|

|    |          |          |          |
|----|----------|----------|----------|
| C  | -5.74405 | 0.22748  | -0.53163 |
| C  | -4.78250 | 2.42086  | -0.89826 |
| C  | -4.46384 | -0.34383 | -0.23686 |
| C  | -3.50678 | 1.90994  | -0.57265 |
| C  | -3.34932 | 0.52884  | -0.23778 |
| C  | -2.38080 | 2.78494  | -0.56023 |
| C  | -1.09231 | 2.28422  | -0.21383 |
| C  | -0.93097 | 0.90892  | 0.11996  |
| C  | -2.05540 | 0.03208  | 0.10452  |
| C  | 0.02060  | 3.15152  | -0.19825 |
| C  | 0.34430  | 0.41578  | 0.47018  |
| C  | -1.88876 | -1.32649 | 0.44315  |
| C  | -2.54370 | 4.14913  | -0.88818 |
| C  | -4.26638 | -1.71855 | 0.09003  |
| C  | -4.92304 | 3.79901  | -1.22575 |
| C  | -3.02354 | -2.18170 | 0.42060  |
| C  | -0.59242 | -1.80100 | 0.79255  |
| C  | 0.48393  | -0.96109 | 0.80547  |
| H  | 1.46855  | -1.33332 | 1.07346  |
| C  | 1.45168  | 1.31048  | 0.47832  |
| C  | -3.84044 | 4.63163  | -1.22373 |
| C  | -1.40418 | 5.00266  | -0.86862 |
| C  | -0.16972 | 4.52155  | -0.53613 |
| C  | 1.29641  | 2.62886  | 0.15553  |
| H  | -1.53564 | 6.05020  | -1.12351 |
| H  | 0.69150  | 5.18350  | -0.52388 |
| S  | -7.22492 | -0.76533 | -0.48307 |
| H  | -6.89697 | 1.92657  | -1.06476 |
| H  | 2.14940  | 3.30127  | 0.16546  |
| H  | 2.42982  | 0.92288  | 0.74822  |
| H  | -5.91020 | 4.17516  | -1.47693 |
| H  | -5.10805 | -2.40004 | 0.06364  |
| H  | -2.88774 | -3.23087 | 0.66698  |
| H  | -0.47570 | -2.84981 | 1.04947  |
| H  | -3.95518 | 5.68191  | -1.47546 |
| O  | -7.05737 | -1.93659 | -1.31294 |
| O  | -8.35634 | 0.12350  | -0.65539 |
| O  | -7.21170 | -1.30695 | 1.02351  |
| H  | -7.36705 | -0.55782 | 1.65238  |
| O  | -6.90247 | 0.68191  | 2.77089  |
| C  | -5.48453 | 0.54414  | 2.89484  |
| C  | -6.36441 | 0.27210  | 4.03448  |
| C  | -4.74740 | 1.84581  | 2.75892  |
| H  | -5.06156 | -0.30188 | 2.35379  |
| H  | -6.57540 | -0.75722 | 4.30994  |
| H  | -6.46486 | 1.01432  | 4.82188  |
| H  | -5.18124 | 2.60807  | 3.40734  |
| H  | -4.77109 | 2.19027  | 1.72402  |
| Cl | -3.03104 | 1.62538  | 3.21188  |

**Fig. S50** Optimized geometry, total energy, and Cartesian coordinates of 13(d) at M06-2X level of theory with 6-31G(d, p) basis set.

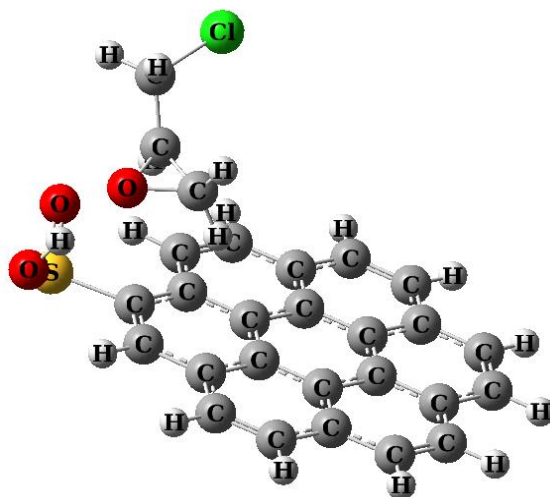

**E = -2122.6485962234 au**

|   |          |          |          |
|---|----------|----------|----------|
| C | -5.52491 | 1.54013  | -0.42134 |
| C | -5.42622 | 0.22082  | -0.06586 |
| C | -4.37356 | 2.35753  | -0.56188 |
| C | -4.15749 | -0.37949 | 0.23417  |
| C | -3.10477 | 1.79336  | -0.31375 |
| C | -2.99767 | 0.42742  | 0.09056  |
| C | -1.93627 | 2.59821  | -0.46633 |
| C | -0.64980 | 2.04182  | -0.21239 |
| C | -0.53516 | 0.68343  | 0.20127  |
| C | -1.70447 | -0.12034 | 0.35595  |
| C | 0.50673  | 2.83672  | -0.36616 |
| C | 0.74013  | 0.13471  | 0.45911  |
| C | -1.57715 | -1.46096 | 0.77452  |
| C | -2.05429 | 3.94688  | -0.86811 |
| C | -3.99399 | -1.73172 | 0.66742  |
| C | -4.46946 | 3.72064  | -0.96305 |
| C | -2.75369 | -2.24134 | 0.92771  |
| C | -0.28106 | -1.99131 | 1.03099  |
| C | 0.83669  | -1.22251 | 0.87725  |
| H | 1.82129  | -1.63703 | 1.07380  |
| C | 1.89166  | 0.95575  | 0.29432  |
| C | -3.34946 | 4.48675  | -1.11142 |
| C | -0.87310 | 4.72717  | -1.01731 |
| C | 0.36057  | 4.19177  | -0.77641 |
| C | 1.78023  | 2.25766  | -0.10376 |
| H | -0.97138 | 5.76343  | -1.32757 |
| H | 1.25432  | 4.79800  | -0.89349 |
| S | -6.98633 | -0.70886 | 0.12522  |



|    |          |          |          |
|----|----------|----------|----------|
| H  | -6.49908 | 1.97304  | -0.62559 |
| H  | 2.66672  | 2.87355  | -0.22487 |
| H  | 2.86840  | 0.52417  | 0.49341  |
| H  | -5.45423 | 4.13877  | -1.14962 |
| H  | -4.86484 | -2.36399 | 0.77418  |
| H  | -2.65411 | -3.27182 | 1.25647  |
| H  | -3.43022 | 5.52547  | -1.41851 |
| O  | -6.72075 | -2.07813 | -0.39687 |
| O  | -7.85290 | 0.11766  | -0.97891 |
| H  | -0.19887 | -3.02568 | 1.35180  |
| H  | -7.38618 | 0.03466  | -1.84584 |
| O  | -6.22450 | -0.34991 | -3.15890 |
| C  | -5.34377 | -1.47402 | -3.10645 |
| C  | -4.82973 | -0.13198 | -3.39155 |
| C  | -5.56661 | -2.45567 | -4.22192 |
| H  | -5.21067 | -1.89474 | -2.11194 |
| H  | -4.30894 | 0.41421  | -2.60901 |
| H  | -4.58540 | 0.13697  | -4.41661 |
| H  | -5.81316 | -1.93234 | -5.14659 |
| H  | -6.36202 | -3.15764 | -3.97197 |
| Cl | -4.07583 | -3.41132 | -4.50314 |

**Fig. S51** Optimized geometry, total energy, and Cartesian coordinates of 13(e) at M06-2X level of theory with 6-31G(d, p) basis set..

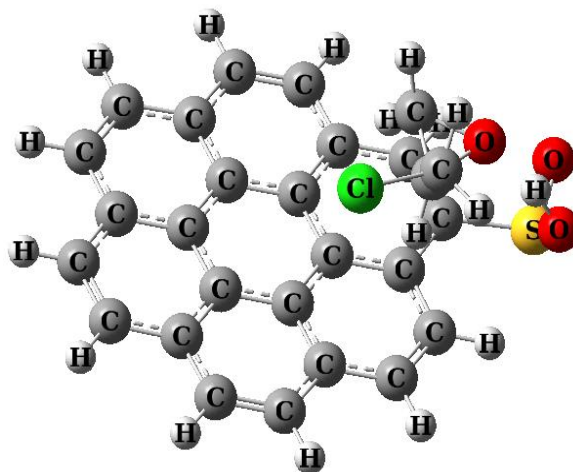

**E = -2122.6487884959 au**

|   |          |          |          |
|---|----------|----------|----------|
| C | -5.74764 | 1.78293  | -0.53579 |
| C | -5.75471 | 0.44065  | -0.28510 |
| C | -4.52453 | 2.48243  | -0.73034 |
| C | -4.54675 | -0.31730 | -0.17428 |
| C | -3.31117 | 1.76283  | -0.66936 |
| C | -3.32288 | 0.36008  | -0.39336 |
| C | -2.07599 | 2.43931  | -0.89321 |
| C | -0.84835 | 1.71624  | -0.85117 |

|    |          |          |          |
|----|----------|----------|----------|
| C  | -0.85635 | 0.31672  | -0.58267 |
| C  | -2.09070 | -0.35974 | -0.34984 |
| C  | 0.37329  | 2.38556  | -1.07718 |
| C  | 0.35913  | -0.39965 | -0.54521 |
| C  | -2.09063 | -1.74427 | -0.07515 |
| C  | -2.06969 | 3.82556  | -1.16320 |
| C  | -4.51702 | -1.71339 | 0.12003  |
| C  | -4.49314 | 3.87911  | -1.00488 |
| C  | -3.33200 | -2.39406 | 0.16789  |
| C  | -0.85123 | -2.44526 | -0.04524 |
| C  | 0.32870  | -1.79728 | -0.27304 |
| H  | 1.26818  | -2.34184 | -0.24805 |
| C  | 1.57797  | 0.29797  | -0.77832 |
| C  | -3.30799 | 4.52656  | -1.21067 |
| C  | -0.82336 | 4.47808  | -1.38410 |
| C  | 0.35274  | 3.78444  | -1.34269 |
| C  | 1.58513  | 1.64019  | -1.03371 |
| H  | -0.82524 | 5.54474  | -1.58897 |
| H  | 1.29655  | 4.29418  | -1.51404 |
| S  | -7.38537 | -0.32006 | -0.02598 |
| H  | -6.69845 | 2.30600  | -0.60114 |
| H  | 2.52217  | 2.16092  | -1.20882 |
| H  | 2.50929  | -0.26018 | -0.74819 |
| H  | -5.43371 | 4.42002  | -1.04749 |
| H  | -5.44757 | -2.24373 | 0.28347  |
| H  | -3.32666 | -3.45722 | 0.39088  |
| H  | -3.29368 | 5.59253  | -1.41875 |
| O  | -8.33946 | 0.73375  | -0.44525 |
| O  | -7.24836 | -1.47825 | -1.17226 |
| H  | -0.86271 | -3.51086 | 0.16439  |
| H  | -6.85291 | -1.12981 | -2.00338 |
| O  | -5.77497 | -0.85974 | -3.42993 |
| C  | -4.41061 | -1.26925 | -3.44985 |
| C  | -4.77466 | 0.13354  | -3.66923 |
| C  | -4.05973 | -2.15630 | -4.61105 |
| H  | -3.99944 | -1.56007 | -2.48469 |
| H  | -4.63798 | 0.85327  | -2.86754 |
| H  | -4.76982 | 0.52703  | -4.68300 |
| H  | -4.53243 | -1.79563 | -5.52529 |
| H  | -4.36105 | -3.18787 | -4.42781 |
| Cl | -2.28449 | -2.15139 | -4.85376 |

**Fig. S52** Optimized geometry, total energy, and Cartesian coordinates of 13(f) at M06-2X level of theory with 6-31G(d, p) basis set.

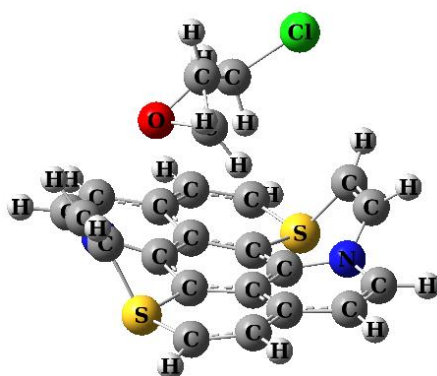

**E = -2327.1972985682 au**

|   |          |          |          |
|---|----------|----------|----------|
| C | -5.56139 | 2.31844  | -0.96177 |
| C | -5.93475 | 1.00546  | -0.67361 |
| C | -4.29668 | 2.86621  | -0.88518 |
| S | -4.80757 | -0.20493 | -0.21300 |
| C | -3.17552 | 2.05748  | -0.46580 |
| C | -3.25787 | 0.67906  | -0.19270 |
| C | -1.88813 | 2.61832  | -0.35469 |
| C | -0.82172 | 1.83392  | 0.07964  |
| C | -0.86184 | 0.42627  | 0.10560  |
| C | -2.13596 | -0.14341 | -0.07453 |
| S | 0.68589  | 2.74701  | 0.34146  |
| C | 0.30638  | -0.40987 | 0.25423  |
| N | -2.25628 | -1.53793 | -0.29726 |
| N | -1.64601 | 3.93041  | -0.82214 |
| C | -4.32243 | -1.36271 | -1.51040 |
| C | -4.01454 | 4.26110  | -1.13244 |
| C | -3.15675 | -1.98094 | -1.25977 |
| C | -1.13533 | -2.36296 | 0.00975  |
| C | 1.54856  | 0.15588  | 0.47023  |
| C | -2.77167 | 4.75641  | -1.10069 |
| C | -0.48100 | 4.15756  | -1.55158 |
| C | 0.68059  | 3.54497  | -1.27608 |
| C | 1.85468  | 1.51011  | 0.57090  |
| H | -0.59941 | 4.83211  | -2.39536 |
| H | 1.59255  | 3.61724  | -1.85172 |
| H | -6.96116 | 0.70240  | -0.53420 |
| H | -6.38188 | 2.99044  | -1.21019 |
| H | 2.79184  | 1.87704  | 0.96051  |
| H | 2.37765  | -0.52445 | 0.66074  |
| H | -4.84134 | 4.93690  | -1.32883 |
| H | -2.82803 | -2.84946 | -1.82580 |
| H | -2.53357 | 5.80051  | -1.25509 |
| C | 0.06966  | -1.83415 | 0.26158  |
| H | -1.35208 | -3.42231 | 0.04552  |
| H | -5.01113 | -1.60583 | -2.30837 |
| H | 0.89056  | -2.50149 | 0.50601  |
| O | -2.11673 | 2.70218  | -3.40746 |

|    |          |          |          |
|----|----------|----------|----------|
| C  | -2.60743 | 1.72667  | -4.30788 |
| C  | -1.46512 | 1.43661  | -3.43350 |
| H  | -2.43130 | 1.93638  | -5.36245 |
| C  | -3.97257 | 1.19825  | -3.96389 |
| H  | -1.62522 | 0.81168  | -2.55500 |
| H  | -0.45591 | 1.44437  | -3.83746 |
| H  | -4.02646 | 0.92382  | -2.90965 |
| Cl | -4.31269 | -0.27542 | -4.93653 |
| H  | -4.75555 | 1.92334  | -4.18740 |

**Fig. S53** Optimized geometry, total energy, and Cartesian coordinates of 13(g) at M06-2X level of theory with 6-31G(d, p) basis set.

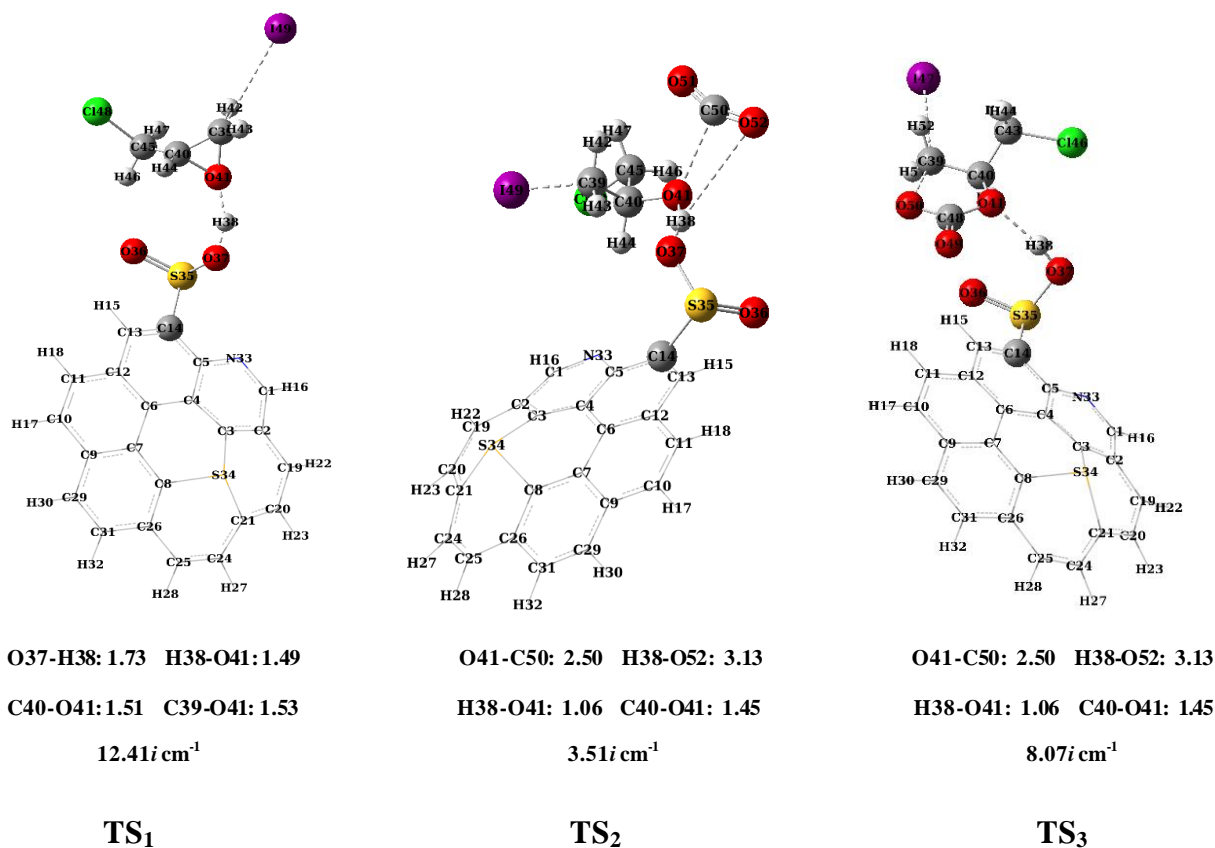

**Fig. S54** Optimized ground state energy structures of the transition states TS<sub>1</sub>, TS<sub>2</sub>, and TS<sub>3</sub> in the CO<sub>2</sub> cycloaddition with the epichlorohydrin and NSC-773 catalyst including the most relevant calculated distances (in Å) and values of the negative imaginary vibrational frequencies.

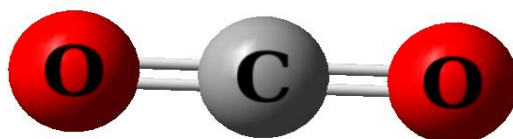

$$E = -188.540119 \text{ au}$$

| Center Number | Atomic Number | Atomic Type | Coordinates (Angstroms) |          |           |
|---------------|---------------|-------------|-------------------------|----------|-----------|
|               |               |             | X                       | Y        | Z         |
| 1             | 6             | 0           | 0.000000                | 0.000000 | 0.000000  |
| 2             | 8             | 0           | 0.000000                | 0.000000 | 1.193247  |
| 3             | 8             | 0           | 0.000000                | 0.000000 | -1.193247 |

**Fig. S55** The optimized geometry, energy, and Cartesian coordinates of CO<sub>2</sub> molecule at B3LYP level of theory using lanl2dz basis set.

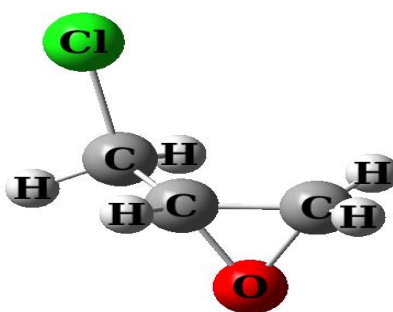

$$E = -207.412805 \text{ au}$$

| Center Number | Atomic Number | Atomic Type | Coordinates (Angstroms) |           |           |
|---------------|---------------|-------------|-------------------------|-----------|-----------|
|               |               |             | X                       | Y         | Z         |
| 1             | 6             | 0           | 0.778159                | -0.109640 | 0.477579  |
| 2             | 6             | 0           | 1.651918                | 0.895198  | -0.190322 |
| 3             | 8             | 0           | 2.138322                | -0.519528 | -0.022025 |
| 4             | 1             | 0           | 0.694175                | -0.089638 | 1.562039  |
| 5             | 1             | 0           | 2.177191                | 1.630533  | 0.413795  |
| 6             | 1             | 0           | 1.443397                | 1.182664  | -1.218818 |
| 7             | 6             | 0           | -0.358777               | -0.764175 | -0.260828 |
| 8             | 1             | 0           | -0.574895               | -1.767099 | 0.108435  |
| 9             | 1             | 0           | -0.197211               | -0.773831 | -1.339092 |
| 10            | 17            | 0           | -1.945708               | 0.226194  | 0.028898  |

**Fig. S56** The optimized geometry, energy, and Cartesian coordinates of epichlorohydrin molecule at B3LYP level of theory using lanl2dz basis set.

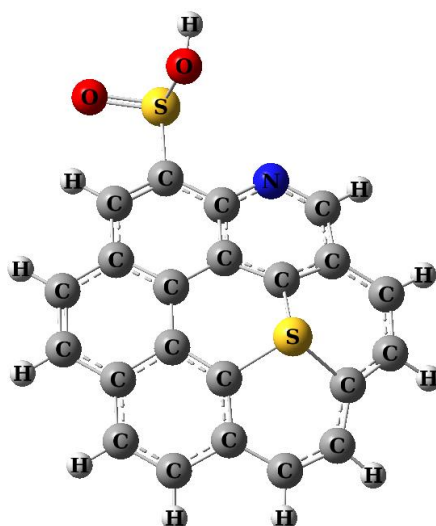

### NSC-773 catalyst

**E= -1070.017239 au**

Zero-point correction = 0.268604 (Hartree/Particle)  
 Thermal correction to Energy = 0.288132  
 Thermal correction to Enthalpy = 0.289076  
 Thermal correction to Gibbs Free Energy = 0.222038

---

| Center Number | Atomic Number | Atomic Type | Coordinates (Angstroms) |           |           |
|---------------|---------------|-------------|-------------------------|-----------|-----------|
|               |               |             | X                       | Y         | Z         |
| 1             | 6             | 0           | 1.157377                | -3.013370 | -0.429473 |
| 2             | 6             | 0           | -0.222416               | -2.723858 | -0.115874 |
| 3             | 6             | 0           | -0.434860               | -1.393333 | 0.288772  |
| 4             | 6             | 0           | 0.506770                | -0.354286 | 0.170615  |
| 5             | 6             | 0           | 1.841144                | -0.791906 | -0.128277 |
| 6             | 6             | 0           | 0.195920                | 1.058384  | 0.244727  |
| 7             | 6             | 0           | -1.178352               | 1.524706  | 0.214014  |
| 8             | 6             | 0           | -2.305622               | 0.679416  | 0.327946  |
| 9             | 6             | 0           | -1.451413               | 2.912058  | -0.044074 |
| 10            | 6             | 0           | -0.356653               | 3.837129  | -0.093492 |
| 11            | 6             | 0           | 0.951232                | 3.402086  | 0.005552  |
| 12            | 6             | 0           | 1.254586                | 2.001420  | 0.108648  |
| 13            | 6             | 0           | 2.606243                | 1.542344  | -0.032985 |
| 14            | 6             | 0           | 2.866505                | 0.198417  | -0.162754 |
| 15            | 1             | 0           | 3.432575                | 2.247110  | -0.100947 |
| 16            | 1             | 0           | 1.433008                | -4.027405 | -0.712726 |
| 17            | 1             | 0           | -0.574183               | 4.892854  | -0.237280 |
| 18            | 1             | 0           | 1.774389                | 4.108917  | -0.056957 |
| 19            | 6             | 0           | -1.295734               | -3.668316 | -0.314882 |
| 20            | 6             | 0           | -2.643382               | -3.285151 | -0.410502 |

---

|    |    |   |           |           |           |
|----|----|---|-----------|-----------|-----------|
| 21 | 6  | 0 | -3.193224 | -2.033283 | -0.062834 |
| 22 | 1  | 0 | -1.026235 | -4.684955 | -0.584716 |
| 23 | 1  | 0 | -3.342982 | -4.003378 | -0.840109 |
| 24 | 6  | 0 | -4.403989 | -1.367377 | -0.364017 |
| 25 | 6  | 0 | -4.659008 | 0.002351  | -0.224164 |
| 26 | 6  | 0 | -3.627406 | 1.004297  | -0.029012 |
| 27 | 1  | 0 | -5.194637 | -1.989549 | -0.784925 |
| 28 | 1  | 0 | -5.656479 | 0.362769  | -0.457708 |
| 29 | 6  | 0 | -2.808880 | 3.316064  | -0.262464 |
| 30 | 1  | 0 | -3.011760 | 4.369257  | -0.443213 |
| 31 | 6  | 0 | -3.849665 | 2.399283  | -0.302538 |
| 32 | 1  | 0 | -4.857185 | 2.724534  | -0.550460 |
| 33 | 7  | 0 | 2.139855  | -2.113303 | -0.393840 |
| 34 | 16 | 0 | -2.067591 | -1.007680 | 1.045449  |
| 35 | 16 | 0 | 4.630814  | -0.342856 | -0.433622 |
| 36 | 8  | 0 | 5.415822  | 1.084137  | -0.613984 |
| 37 | 8  | 0 | 4.792952  | -0.812263 | 1.358264  |
| 38 | 1  | 0 | 5.667704  | -1.255910 | 1.484849  |

---

**Fig. S57** The optimized geometry, energy, thermal corrections, and Cartesian coordinates of modelled NSC-773 catalyst at B3LYP level of theory using lanl2dz basis set.

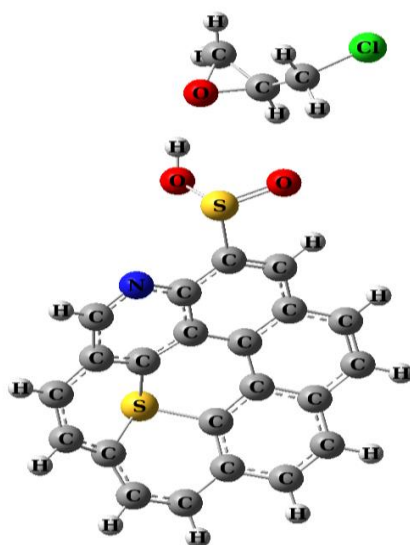

**NSC-773 catalyst + ECH**

**E = -1277.450469 au**

Zero-point correction = 0.347787 (Hartree/Particle)  
 Thermal correction to Energy = 0.374040  
 Thermal correction to Enthalpy = 0.374984  
 Thermal correction to Gibbs Free Energy = 0.288906

---

| Center<br>Number | Atomic<br>Number | Atomic<br>Type | Coordinates (Angstroms) |           |           |
|------------------|------------------|----------------|-------------------------|-----------|-----------|
|                  |                  |                | X                       | Y         | Z         |
| 1                | 6                | 0              | -1.008004               | -3.179392 | -0.664964 |
| 2                | 6                | 0              | -2.303276               | -2.709209 | -0.231223 |
| 3                | 6                | 0              | -2.292422               | -1.373897 | 0.210723  |
| 4                | 6                | 0              | -1.225769               | -0.473527 | 0.031621  |
| 5                | 6                | 0              | 0.005338                | -1.084768 | -0.384505 |
| 6                | 6                | 0              | -1.327316               | 0.965967  | 0.153273  |
| 7                | 6                | 0              | -2.620264               | 1.620130  | 0.243179  |
| 8                | 6                | 0              | -3.842658               | 0.937441  | 0.437832  |
| 9                | 6                | 0              | -2.714636               | 3.038209  | 0.028885  |
| 10               | 6                | 0              | -1.507711               | 3.802330  | -0.098581 |
| 11               | 6                | 0              | -0.270624               | 3.186595  | -0.114544 |
| 12               | 6                | 0              | -0.160242               | 1.755139  | -0.055746 |
| 13               | 6                | 0              | 1.097853                | 1.114936  | -0.313369 |
| 14               | 6                | 0              | 1.155417                | -0.247901 | -0.483956 |
| 15               | 1                | 0              | 2.006959                | 1.698660  | -0.442321 |
| 16               | 1                | 0              | -0.901992               | -4.213452 | -0.987307 |
| 17               | 1                | 0              | -1.584877               | 4.881387  | -0.209530 |
| 18               | 1                | 0              | 0.636131                | 3.773250  | -0.236364 |
| 19               | 6                | 0              | -3.511774               | -3.489220 | -0.354273 |
| 20               | 6                | 0              | -4.795227               | -2.920068 | -0.330268 |
| 21               | 6                | 0              | -5.133600               | -1.613737 | 0.081844  |
| 22               | 1                | 0              | -3.410839               | -4.525638 | -0.661924 |
| 23               | 1                | 0              | -5.621435               | -3.522130 | -0.710789 |
| 24               | 6                | 0              | -6.258205               | -0.777478 | -0.106783 |
| 25               | 6                | 0              | -6.305011               | 0.610362  | 0.074505  |
| 26               | 6                | 0              | -5.129909               | 1.452982  | 0.197383  |
| 27               | 1                | 0              | -7.160208               | -1.271708 | -0.469510 |
| 28               | 1                | 0              | -7.257126               | 1.112534  | -0.069460 |
| 29               | 6                | 0              | -4.014577               | 3.633197  | -0.069675 |
| 30               | 1                | 0              | -4.080619               | 4.708761  | -0.217693 |
| 31               | 6                | 0              | -5.174261               | 2.872007  | -0.035966 |
| 32               | 1                | 0              | -6.142426               | 3.341069  | -0.194103 |
| 33               | 7                | 0              | 0.091098                | -2.426717 | -0.696736 |
| 34               | 16               | 0              | -3.787825               | -0.784676 | 1.107033  |
| 35               | 16               | 0              | 2.802851                | -1.027382 | -0.902733 |
| 36               | 8                | 0              | 3.764036                | 0.302879  | -1.114111 |
| 37               | 8                | 0              | 3.084116                | -1.564762 | 0.811185  |
| 38               | 1                | 0              | 4.067771                | -1.766374 | 0.912341  |
| 39               | 6                | 0              | 6.828543                | -1.076567 | 1.737670  |
| 40               | 6                | 0              | 6.189110                | -0.155957 | 0.757249  |
| 41               | 8                | 0              | 5.774160                | -1.614287 | 0.800866  |
| 42               | 1                | 0              | 7.823912                | -1.467013 | 1.540595  |
| 43               | 1                | 0              | 6.525966                | -1.040713 | 2.780976  |
| 44               | 1                | 0              | 5.408354                | 0.516235  | 1.100432  |
| 45               | 6                | 0              | 6.860046                | 0.240409  | -0.528812 |
| 46               | 1                | 0              | 6.122578                | 0.539194  | -1.272290 |



|    |    |   |          |           |           |
|----|----|---|----------|-----------|-----------|
| 47 | 1  | 0 | 7.534774 | -0.530195 | -0.903032 |
| 48 | 17 | 0 | 7.937150 | 1.763974  | -0.201424 |

---

**Fig. S58** The optimized geometry, energy, thermal corrections, and Cartesian coordinates of NSC-773 catalyst with epichlorohydrin (ECH) at B3LYP level of theory using lan12dz basis set.

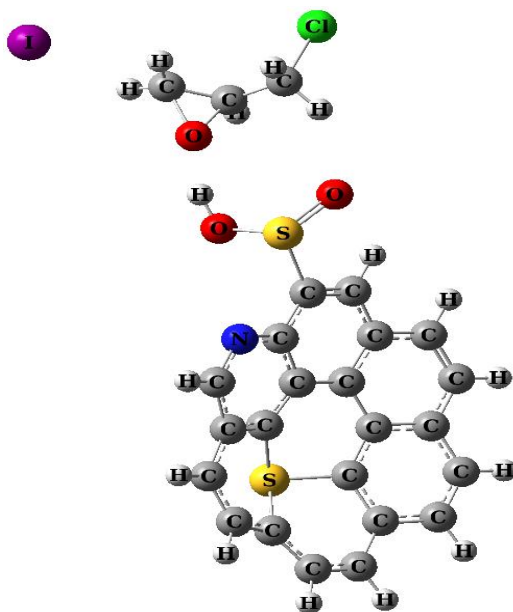

**NSC-773 catalyst + ECH + I (Int<sub>0</sub>)**

**E = -1288.938566 au**

Zero-point correction = 0.347258 (Hartree/Particle)  
 Thermal correction to Energy = 0.376105  
 Thermal correction to Enthalpy = 0.377049  
 Thermal correction to Gibbs Free Energy = 0.279842

---

| Center Number | Atomic Number | Atomic Type | Coordinates (Angstroms) |           |           |
|---------------|---------------|-------------|-------------------------|-----------|-----------|
|               |               |             | X                       | Y         | Z         |
| 1             | 6             | 0           | 2.247418                | -2.299496 | 2.117665  |
| 2             | 6             | 0           | 3.476178                | -2.430405 | 1.373036  |
| 3             | 6             | 0           | 3.639851                | -1.439058 | 0.389758  |
| 4             | 6             | 0           | 2.847828                | -0.282322 | 0.267913  |
| 5             | 6             | 0           | 1.641406                | -0.300221 | 1.050791  |
| 6             | 6             | 0           | 3.212417                | 0.892363  | -0.495899 |
| 7             | 6             | 0           | 4.557318                | 1.062787  | -1.015755 |
| 8             | 6             | 0           | 5.539767                | 0.045990  | -1.024039 |
| 9             | 6             | 0           | 4.983800                | 2.356856  | -1.474982 |
| 10            | 6             | 0           | 4.016099                | 3.411893  | -1.568958 |

---

|    |    |   |           |           |           |
|----|----|---|-----------|-----------|-----------|
| 11 | 6  | 0 | 2.716343  | 3.229397  | -1.137347 |
| 12 | 6  | 0 | 2.306510  | 1.991484  | -0.531785 |
| 13 | 6  | 0 | 1.036096  | 1.891216  | 0.124412  |
| 14 | 6  | 0 | 0.738024  | 0.791545  | 0.895271  |
| 15 | 1  | 0 | 0.311627  | 2.702355  | 0.079271  |
| 16 | 1  | 0 | 2.008516  | -3.040620 | 2.878329  |
| 17 | 1  | 0 | 4.332609  | 4.373534  | -1.966939 |
| 18 | 1  | 0 | 1.996107  | 4.041565  | -1.192202 |
| 19 | 6  | 0 | 4.498269  | -3.404513 | 1.688262  |
| 20 | 6  | 0 | 5.828818  | -3.285608 | 1.263058  |
| 21 | 6  | 0 | 6.326639  | -2.401596 | 0.276883  |
| 22 | 1  | 0 | 4.256663  | -4.159145 | 2.431127  |
| 23 | 1  | 0 | 6.577463  | -3.901071 | 1.764114  |
| 24 | 6  | 0 | 7.609419  | -1.914301 | -0.055642 |
| 25 | 6  | 0 | 7.899230  | -0.790222 | -0.843524 |
| 26 | 6  | 0 | 6.925914  | 0.227132  | -1.192128 |
| 27 | 1  | 0 | 8.449221  | -2.451791 | 0.387256  |
| 28 | 1  | 0 | 8.941926  | -0.564267 | -1.047987 |
| 29 | 6  | 0 | 6.364940  | 2.546985  | -1.804741 |
| 30 | 1  | 0 | 6.678942  | 3.524543  | -2.165011 |
| 31 | 6  | 0 | 7.308672  | 1.544518  | -1.627801 |
| 32 | 1  | 0 | 8.362069  | 1.743711  | -1.811287 |
| 33 | 7  | 0 | 1.360387  | -1.320362 | 1.938376  |
| 34 | 16 | 0 | 4.982119  | -1.706761 | -0.842081 |
| 35 | 16 | 0 | -0.914292 | 0.758606  | 1.779514  |
| 36 | 8  | 0 | -1.452776 | 2.301500  | 1.516901  |
| 37 | 8  | 0 | -1.651906 | -0.280835 | 0.500614  |
| 38 | 1  | 0 | -2.651261 | -0.341322 | 0.688856  |
| 39 | 6  | 0 | -5.618177 | 0.104919  | 0.856794  |
| 40 | 6  | 0 | -4.760891 | 1.300450  | 0.629925  |
| 41 | 8  | 0 | -4.135802 | 0.060218  | 1.231968  |
| 42 | 1  | 0 | -6.266595 | 0.075091  | 1.729255  |
| 43 | 1  | 0 | -5.921401 | -0.534647 | 0.027454  |
| 44 | 1  | 0 | -4.424825 | 1.504949  | -0.383776 |
| 45 | 6  | 0 | -4.706544 | 2.464631  | 1.584533  |
| 46 | 1  | 0 | -3.700119 | 2.881929  | 1.638191  |
| 47 | 1  | 0 | -5.087721 | 2.204129  | 2.572715  |
| 48 | 17 | 0 | -5.825531 | 3.859993  | 0.951469  |
| 49 | 53 | 0 | -8.025006 | -1.845272 | -1.412113 |

**Fig. S59** The optimized geometry, energy, thermal corrections, and Cartesian coordinates of NSC-773 catalyst + ECH+ I<sup>-</sup> (Int<sub>0</sub>) at B3LYP level of theory using lanl2dz basis set.

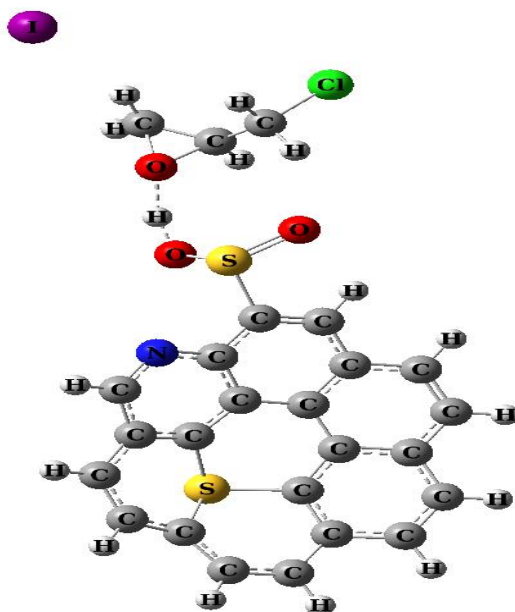

**TS<sub>1</sub>**

**E = -1288.938918 au**

Zero-point correction = 0.347117 (Hartree/Particle)  
 Thermal correction to Energy = 0.375140  
 Thermal correction to Enthalpy = 0.376084  
 Thermal correction to Gibbs Free Energy = 0.281706

---

| Center Number | Atomic Number | Atomic Type | Coordinates (Angstroms) |           |           |
|---------------|---------------|-------------|-------------------------|-----------|-----------|
|               |               |             | X                       | Y         | Z         |
| 1             | 6             | 0           | 2.357330                | 2.762305  | -1.455030 |
| 2             | 6             | 0           | 3.638278                | 2.710790  | -0.793415 |
| 3             | 6             | 0           | 3.840793                | 1.526353  | -0.063294 |
| 4             | 6             | 0           | 3.025998                | 0.381435  | -0.137167 |
| 5             | 6             | 0           | 1.768915                | 0.586116  | -0.805881 |
| 6             | 6             | 0           | 3.408680                | -0.936723 | 0.323768  |
| 7             | 6             | 0           | 4.781033                | -1.234538 | 0.692639  |
| 8             | 6             | 0           | 5.791014                | -0.257358 | 0.848655  |
| 9             | 6             | 0           | 5.200807                | -2.603324 | 0.826268  |
| 10            | 6             | 0           | 4.211828                | -3.640645 | 0.759566  |
| 11            | 6             | 0           | 2.891112                | -3.351146 | 0.475409  |
| 12            | 6             | 0           | 2.475957                | -2.005249 | 0.186218  |
| 13            | 6             | 0           | 1.166801                | -1.747273 | -0.336850 |
| 14            | 6             | 0           | 0.847416                | -0.501323 | -0.825510 |
| 15            | 1             | 0           | 0.424740                | -2.539609 | -0.417728 |
| 16            | 1             | 0           | 2.087908                | 3.654621  | -2.017309 |
| 17            | 1             | 0           | 4.527413                | -4.670251 | 0.913339  |
| 18            | 1             | 0           | 2.153571                | -4.146341 | 0.404098  |
| 19            | 6             | 0           | 4.664087                | 3.716277  | -0.965285 |

---

|    |    |   |           |           |           |
|----|----|---|-----------|-----------|-----------|
| 20 | 6  | 0 | 6.017084  | 3.489682  | -0.676402 |
| 21 | 6  | 0 | 6.556631  | 2.405233  | 0.054839  |
| 22 | 1  | 0 | 4.393628  | 4.617634  | -1.507610 |
| 23 | 1  | 0 | 6.746545  | 4.189501  | -1.086829 |
| 24 | 6  | 0 | 7.844508  | 1.839646  | 0.176887  |
| 25 | 6  | 0 | 8.155553  | 0.566757  | 0.678310  |
| 26 | 6  | 0 | 7.179683  | -0.489172 | 0.869377  |
| 27 | 1  | 0 | 8.666722  | 2.449318  | -0.200710 |
| 28 | 1  | 0 | 9.202917  | 0.287534  | 0.749928  |
| 29 | 6  | 0 | 6.595403  | -2.879238 | 1.003086  |
| 30 | 1  | 0 | 6.905166  | -3.916055 | 1.117393  |
| 31 | 6  | 0 | 7.553380  | -1.874931 | 0.978593  |
| 32 | 1  | 0 | 8.610754  | -2.123386 | 1.035127  |
| 33 | 7  | 0 | 1.456555  | 1.779621  | -1.426890 |
| 34 | 16 | 0 | 5.273644  | 1.500190  | 1.093084  |
| 35 | 16 | 0 | -0.859743 | -0.256487 | -1.560652 |
| 36 | 8  | 0 | -1.424008 | -1.811943 | -1.593284 |
| 37 | 8  | 0 | -1.484832 | 0.491764  | -0.040085 |
| 38 | 1  | 0 | -2.500103 | 0.562258  | -0.124189 |
| 39 | 6  | 0 | -5.427289 | 0.092017  | 0.079226  |
| 40 | 6  | 0 | -4.559656 | -1.097039 | -0.144027 |
| 41 | 8  | 0 | -4.032982 | 0.266895  | -0.532835 |
| 42 | 1  | 0 | -6.244115 | 0.329836  | -0.594849 |
| 43 | 1  | 0 | -5.538435 | 0.511287  | 1.073740  |
| 44 | 1  | 0 | -4.038595 | -1.529471 | 0.707406  |
| 45 | 6  | 0 | -4.700181 | -2.005922 | -1.337381 |
| 46 | 1  | 0 | -3.719697 | -2.311289 | -1.706326 |
| 47 | 1  | 0 | -5.319444 | -1.570717 | -2.121865 |
| 48 | 17 | 0 | -5.575496 | -3.602624 | -0.809665 |
| 49 | 53 | 0 | -8.840948 | 1.335906  | 0.940831  |

---

**Fig. S60** The optimized geometry, energy, thermal corrections, and Cartesian coordinates of TS<sub>1</sub> at B3LYP level of theory using lanl2dz basis set.

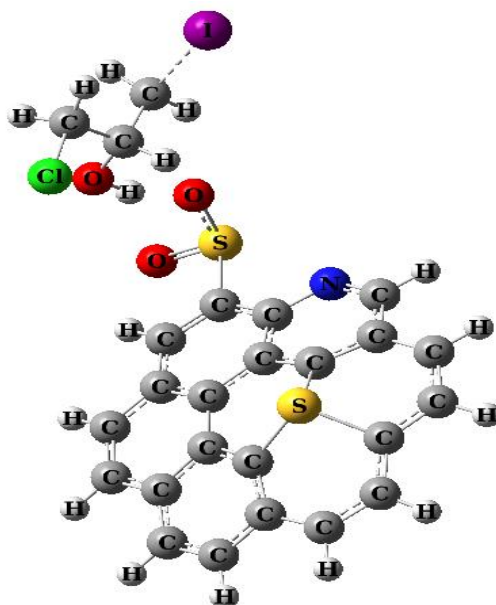

**Int<sub>1</sub>**

**E = -1288.963486 au**

Zero-point correction = 0.347524 (Hartree/Particle)  
 Thermal correction to Energy = 0.375643  
 Thermal correction to Enthalpy = 0.376587  
 Thermal correction to Gibbs Free Energy = 0.282090

---

| Center Number | Atomic Number | Atomic Type | Coordinates (Angstroms) |           |           |
|---------------|---------------|-------------|-------------------------|-----------|-----------|
|               |               |             | X                       | Y         | Z         |
| 1             | 6             | 0           | -0.896352               | -2.005169 | -2.329146 |
| 2             | 6             | 0           | -1.961362               | -2.365457 | -1.423670 |
| 3             | 6             | 0           | -2.339211               | -1.318477 | -0.572143 |
| 4             | 6             | 0           | -1.928465               | 0.022306  | -0.700587 |
| 5             | 6             | 0           | -0.832144               | 0.232939  | -1.614982 |
| 6             | 6             | 0           | -2.580326               | 1.143653  | -0.059619 |
| 7             | 6             | 0           | -3.872545               | 0.999863  | 0.588806  |
| 8             | 6             | 0           | -4.494453               | -0.241688 | 0.856004  |
| 9             | 6             | 0           | -4.639443               | 2.171010  | 0.917327  |
| 10            | 6             | 0           | -4.036853               | 3.462015  | 0.749203  |
| 11            | 6             | 0           | -2.778741               | 3.594226  | 0.193214  |
| 12            | 6             | 0           | -2.052973               | 2.447661  | -0.281912 |
| 13            | 6             | 0           | -0.862674               | 2.613276  | -1.063667 |
| 14            | 6             | 0           | -0.286059               | 1.548907  | -1.717093 |
| 15            | 1             | 0           | -0.409478               | 3.593254  | -1.223452 |
| 16            | 1             | 0           | -0.508356               | -2.759607 | -3.012198 |
| 17            | 1             | 0           | -4.602283               | 4.342392  | 1.048171  |
| 18            | 1             | 0           | -2.336294               | 4.576631  | 0.049248  |
| 19            | 6             | 0           | -2.656683               | -3.637051 | -1.474290 |

---

|    |    |   |           |           |           |
|----|----|---|-----------|-----------|-----------|
| 20 | 6  | 0 | -3.919323 | -3.844011 | -0.905935 |
| 21 | 6  | 0 | -4.585762 | -2.992348 | 0.008986  |
| 22 | 1  | 0 | -2.253142 | -4.398518 | -2.135864 |
| 23 | 1  | 0 | -4.479486 | -4.726172 | -1.220602 |
| 24 | 6  | 0 | -5.926998 | -2.854181 | 0.428217  |
| 25 | 6  | 0 | -6.488725 | -1.749317 | 1.085742  |
| 26 | 6  | 0 | -5.851909 | -0.447739 | 1.168631  |
| 27 | 1  | 0 | -6.590613 | -3.681393 | 0.170577  |
| 28 | 1  | 0 | -7.531715 | -1.806937 | 1.385045  |
| 29 | 6  | 0 | -5.983351 | 2.002406  | 1.384085  |
| 30 | 1  | 0 | -6.553507 | 2.892864  | 1.642609  |
| 31 | 6  | 0 | -6.585833 | 0.753928  | 1.463329  |
| 32 | 1  | 0 | -7.633095 | 0.665820  | 1.744635  |
| 33 | 7  | 0 | -0.334911 | -0.798732 | -2.390733 |
| 34 | 16 | 0 | -3.438918 | -1.758344 | 0.843328  |
| 35 | 16 | 0 | 1.308492  | 1.919279  | -2.725875 |
| 36 | 8  | 0 | 1.238775  | 3.589689  | -2.697163 |
| 37 | 8  | 0 | 2.450575  | 1.367537  | -1.588305 |
| 38 | 1  | 0 | 2.724234  | 1.830663  | -0.188930 |
| 39 | 6  | 0 | 4.903551  | 0.522695  | -0.002478 |
| 40 | 6  | 0 | 3.802699  | 0.664438  | 1.075349  |
| 41 | 8  | 0 | 3.131582  | 1.900177  | 0.768612  |
| 42 | 1  | 0 | 5.660000  | 1.307299  | 0.071716  |
| 43 | 1  | 0 | 4.435595  | 0.511714  | -0.989877 |
| 44 | 1  | 0 | 3.128442  | -0.202831 | 1.013224  |
| 45 | 6  | 0 | 4.391703  | 0.775880  | 2.477645  |
| 46 | 1  | 0 | 4.798700  | 1.775402  | 2.639303  |
| 47 | 1  | 0 | 5.120104  | -0.006844 | 2.691345  |
| 48 | 17 | 0 | 3.065694  | 0.561842  | 3.817388  |
| 49 | 53 | 0 | 6.067004  | -1.402013 | 0.092530  |

---

**Fig. S61** The optimized geometry, energy, thermal corrections, and Cartesian coordinates of

Int<sub>1</sub> at B3LYP level of theory using lanl2dz basis set.

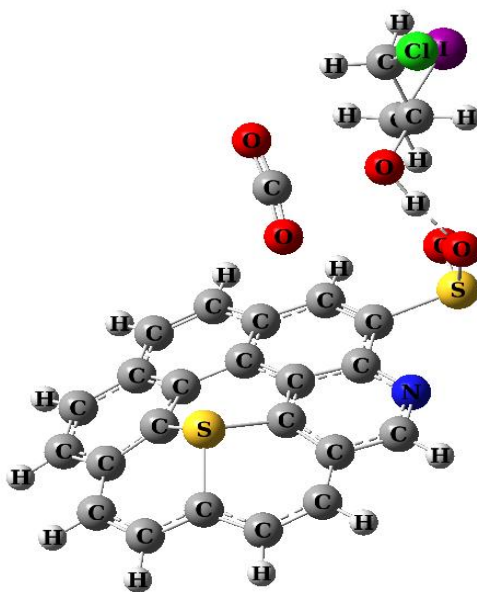

**Int<sub>2</sub>**

**E = -1477.520563 au**

Zero-point correction = 0.359364 (Hartree/Particle)  
 Thermal correction to Energy = 0.391343  
 Thermal correction to Enthalpy = 0.392288  
 Thermal correction to Gibbs Free Energy = 0.289749

---

| Center Number | Atomic Number | Atomic Type | Coordinates (Angstroms) |           |           |
|---------------|---------------|-------------|-------------------------|-----------|-----------|
|               |               |             | X                       | Y         | Z         |
| 1             | 6             | 0           | -2.688514               | 3.162184  | 1.464802  |
| 2             | 6             | 0           | -3.760772               | 2.607395  | 0.674131  |
| 3             | 6             | 0           | -3.480584               | 1.323875  | 0.186601  |
| 4             | 6             | 0           | -2.390377               | 0.525524  | 0.580182  |
| 5             | 6             | 0           | -1.373497               | 1.221558  | 1.327106  |
| 6             | 6             | 0           | -2.299602               | -0.901848 | 0.362627  |
| 7             | 6             | 0           | -3.445365               | -1.675273 | -0.082564 |
| 8             | 6             | 0           | -4.651509               | -1.108436 | -0.555695 |
| 9             | 6             | 0           | -3.423950               | -3.108908 | 0.027370  |
| 10            | 6             | 0           | -2.205479               | -3.754385 | 0.422010  |
| 11            | 6             | 0           | -1.092765               | -3.017213 | 0.781348  |
| 12            | 6             | 0           | -1.135588               | -1.581020 | 0.819288  |
| 13            | 6             | 0           | -0.056764               | -0.835109 | 1.400869  |
| 14            | 6             | 0           | -0.176317               | 0.511400  | 1.649783  |
| 15            | 1             | 0           | 0.873202                | -1.316932 | 1.704517  |
| 16            | 1             | 0           | -2.798910               | 4.166202  | 1.872069  |
| 17            | 1             | 0           | -2.180088               | -4.841699 | 0.455899  |
| 18            | 1             | 0           | -0.179090               | -3.512999 | 1.099492  |
| 19            | 6             | 0           | -5.048915               | 3.254013  | 0.510849  |
| 20            | 6             | 0           | -6.205300               | 2.571127  | 0.116553  |
| 21            | 6             | 0           | -6.272246               | 1.267185  | -0.433750 |

---

|    |    |   |           |           |           |
|----|----|---|-----------|-----------|-----------|
| 22 | 1  | 0 | -5.146738 | 4.269101  | 0.885513  |
| 23 | 1  | 0 | -7.166091 | 3.061763  | 0.281261  |
| 24 | 6  | 0 | -7.303103 | 0.314705  | -0.584633 |
| 25 | 6  | 0 | -7.145063 | -1.055981 | -0.841072 |
| 26 | 6  | 0 | -5.889186 | -1.766668 | -0.688962 |
| 27 | 1  | 0 | -8.318206 | 0.689545  | -0.442876 |
| 28 | 1  | 0 | -8.039126 | -1.658859 | -0.974715 |
| 29 | 6  | 0 | -4.628222 | -3.835933 | -0.245435 |
| 30 | 1  | 0 | -4.601470 | -4.921607 | -0.172199 |
| 31 | 6  | 0 | -5.823699 | -3.196827 | -0.544652 |
| 32 | 1  | 0 | -6.738679 | -3.772362 | -0.667968 |
| 33 | 7  | 0 | -1.547939 | 2.529770  | 1.736154  |
| 34 | 16 | 0 | -4.623305 | 0.657483  | -1.099363 |
| 35 | 16 | 0 | 1.340242  | 1.414040  | 2.399653  |
| 36 | 8  | 0 | 2.342473  | 0.080219  | 2.617308  |
| 37 | 8  | 0 | 1.855515  | 2.272253  | 1.019083  |
| 38 | 1  | 0 | 2.244923  | 1.528120  | -0.146697 |
| 39 | 6  | 0 | 4.160528  | -0.506219 | 0.087356  |
| 40 | 6  | 0 | 4.044637  | 0.752297  | -0.804202 |
| 41 | 8  | 0 | 2.627376  | 0.973074  | -0.967944 |
| 42 | 1  | 0 | 3.779144  | -1.397808 | -0.416893 |
| 43 | 1  | 0 | 3.665226  | -0.343382 | 1.053334  |
| 44 | 1  | 0 | 4.512982  | 1.603905  | -0.291765 |
| 45 | 6  | 0 | 4.687024  | 0.542776  | -2.173376 |
| 46 | 1  | 0 | 4.074241  | -0.107743 | -2.797238 |
| 47 | 1  | 0 | 5.715744  | 0.190443  | -2.098527 |
| 48 | 17 | 0 | 4.815660  | 2.172196  | -3.140814 |
| 49 | 53 | 0 | 6.276344  | -1.049785 | 0.641023  |
| 50 | 6  | 0 | 0.963410  | -0.089030 | -2.458738 |
| 51 | 8  | 0 | 0.052572  | 0.521896  | -1.989139 |
| 52 | 8  | 0 | 1.747357  | -0.785478 | -3.037814 |

---

**Fig. S62** The optimized geometry, energy, thermal corrections, and Cartesian coordinates of Int<sub>2</sub> at B3LYP level of theory using lanl2dz basis set.



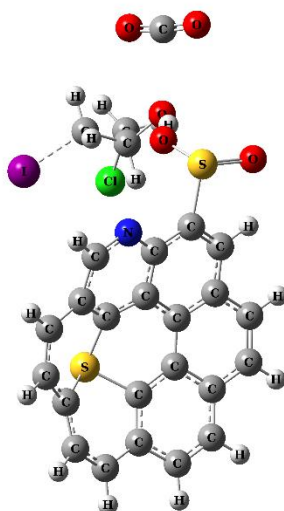

## TS<sub>2</sub>

**E = -1477.510231 au**

Zero-point correction = 0.358643 (Hartree/Particle)  
 Thermal correction to Energy = 0.390175  
 Thermal correction to Enthalpy = 0.391119  
 Thermal correction to Gibbs Free Energy = 0.288420

| Center Number | Atomic Number | Atomic Type | Coordinates (Angstroms) |           |           |
|---------------|---------------|-------------|-------------------------|-----------|-----------|
|               |               |             | X                       | Y         | Z         |
| 1             | 6             | 0           | -1.491904               | -0.605232 | -3.288170 |
| 2             | 6             | 0           | -2.518335               | -1.186235 | -2.455910 |
| 3             | 6             | 0           | -2.578172               | -0.618725 | -1.175783 |
| 4             | 6             | 0           | -1.902083               | 0.548823  | -0.772741 |
| 5             | 6             | 0           | -0.879819               | 0.999908  | -1.685346 |
| 6             | 6             | 0           | -2.231838               | 1.321094  | 0.405674  |
| 7             | 6             | 0           | -3.456142               | 1.081023  | 1.150378  |
| 8             | 6             | 0           | -4.301897               | -0.034549 | 0.951314  |
| 9             | 6             | 0           | -3.917514               | 2.059653  | 2.097374  |
| 10            | 6             | 0           | -3.070734               | 3.175188  | 2.407925  |
| 11            | 6             | 0           | -1.873346               | 3.367247  | 1.745509  |
| 12            | 6             | 0           | -1.460478               | 2.484310  | 0.688610  |
| 13            | 6             | 0           | -0.343368               | 2.820710  | -0.145326 |
| 14            | 6             | 0           | -0.076054               | 2.114357  | -1.295105 |
| 15            | 1             | 0           | 0.290128                | 3.685134  | 0.061373  |
| 16            | 1             | 0           | -1.342313               | -1.000125 | -4.292086 |
| 17            | 1             | 0           | -3.402238               | 3.884901  | 3.163218  |
| 18            | 1             | 0           | -1.246926               | 4.226744  | 1.970202  |

|    |    |   |           |           |           |
|----|----|---|-----------|-----------|-----------|
| 19 | 6  | 0 | -3.473097 | -2.166761 | -2.934121 |
| 20 | 6  | 0 | -4.690154 | -2.427763 | -2.293106 |
| 21 | 6  | 0 | -5.065614 | -2.017637 | -0.990539 |
| 22 | 1  | 0 | -3.308487 | -2.579320 | -3.925560 |
| 23 | 1  | 0 | -5.455336 | -2.965448 | -2.855542 |
| 24 | 6  | 0 | -6.298819 | -1.897541 | -0.313456 |
| 25 | 6  | 0 | -6.543016 | -1.161793 | 0.855897  |
| 26 | 6  | 0 | -5.635388 | -0.161058 | 1.385815  |
| 27 | 1  | 0 | -7.146787 | -2.399543 | -0.782400 |
| 28 | 1  | 0 | -7.539950 | -1.199536 | 1.286425  |
| 29 | 6  | 0 | -5.214780 | 1.891053  | 2.681483  |
| 30 | 1  | 0 | -5.552026 | 2.628840  | 3.407194  |
| 31 | 6  | 0 | -6.061301 | 0.854830  | 2.311064  |
| 32 | 1  | 0 | -7.070754 | 0.799428  | 2.712973  |
| 33 | 7  | 0 | -0.692064 | 0.391791  | -2.913311 |
| 34 | 16 | 0 | -3.604452 | -1.504886 | 0.075778  |
| 35 | 16 | 0 | 1.448904  | 2.681067  | -2.320471 |
| 36 | 8  | 0 | 1.751725  | 4.125570  | -1.539027 |
| 37 | 8  | 0 | 2.551970  | 1.489788  | -1.784410 |
| 38 | 1  | 0 | 3.457527  | 1.545514  | -0.678522 |
| 39 | 6  | 0 | 3.692783  | -1.020726 | -0.253366 |
| 40 | 6  | 0 | 3.594912  | 0.106273  | 0.790219  |
| 41 | 8  | 0 | 4.118001  | 1.285187  | 0.114956  |
| 42 | 1  | 0 | 4.731527  | -1.220786 | -0.521698 |
| 43 | 1  | 0 | 3.102044  | -0.748154 | -1.129945 |
| 44 | 1  | 0 | 2.547259  | 0.264162  | 1.079974  |
| 45 | 6  | 0 | 4.468869  | -0.051530 | 2.043990  |
| 46 | 1  | 0 | 4.777519  | 0.937869  | 2.378814  |
| 47 | 1  | 0 | 5.326772  | -0.707127 | 1.895113  |
| 48 | 17 | 0 | 3.528718  | -0.778465 | 3.528195  |
| 49 | 53 | 0 | 2.877659  | -3.011141 | 0.355699  |
| 50 | 6  | 0 | 6.538050  | 1.542392  | -0.536156 |
| 51 | 8  | 0 | 6.870631  | 0.478378  | -0.093120 |
| 52 | 8  | 0 | 6.382246  | 2.621896  | -1.017070 |

-----

**Fig. S63** The optimized geometry, energy, thermal corrections, and Cartesian coordinates of TS<sub>2</sub> at B3LYP level of theory using lanl2dz basis set.

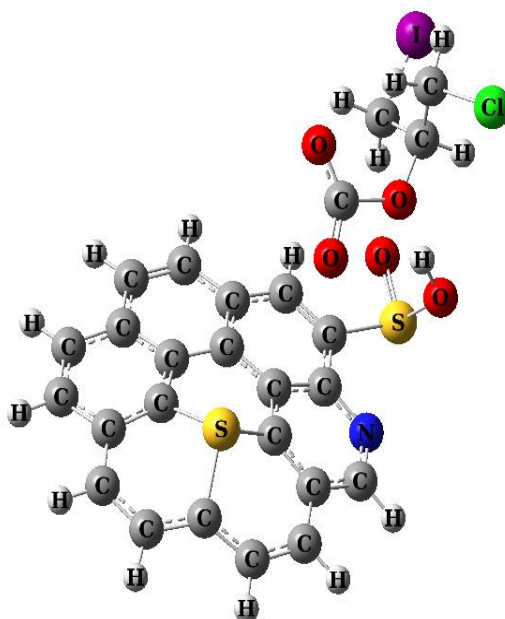

### Int<sub>3</sub>

**E = -1477.522949 au**

Zero-point correction = 0.361128 (Hartree/Particle)  
 Thermal correction to Energy = 0.391946  
 Thermal correction to Enthalpy = 0.392891  
 Thermal correction to Gibbs Free Energy = 0.295255

| Center Number | Atomic Number | Atomic Type | Coordinates (Angstroms) |           |           |
|---------------|---------------|-------------|-------------------------|-----------|-----------|
|               |               |             | X                       | Y         | Z         |
| 1             | 6             | 0           | -2.606380               | -3.144661 | -1.442082 |
| 2             | 6             | 0           | -3.632513               | -2.584536 | -0.598503 |
| 3             | 6             | 0           | -3.336323               | -1.289804 | -0.148369 |
| 4             | 6             | 0           | -2.277261               | -0.492671 | -0.614586 |
| 5             | 6             | 0           | -1.305811               | -1.195752 | -1.404053 |
| 6             | 6             | 0           | -2.178852               | 0.937351  | -0.425333 |
| 7             | 6             | 0           | -3.297997               | 1.710295  | 0.077447  |
| 8             | 6             | 0           | -4.470081               | 1.142228  | 0.628716  |
| 9             | 6             | 0           | -3.288561               | 3.141997  | -0.048762 |
| 10            | 6             | 0           | -2.096589               | 3.787420  | -0.516369 |
| 11            | 6             | 0           | -1.001941               | 3.049774  | -0.925832 |
| 12            | 6             | 0           | -1.044572               | 1.614579  | -0.945351 |
| 13            | 6             | 0           | 0.009842                | 0.864285  | -1.565765 |
| 14            | 6             | 0           | -0.127203               | -0.484225 | -1.781317 |
| 15            | 1             | 0           | 0.924623                | 1.351693  | -1.897895 |
| 16            | 1             | 0           | -2.732336               | -4.154795 | -1.828447 |
| 17            | 1             | 0           | -2.075225               | 4.874415  | -0.557793 |
| 18            | 1             | 0           | -0.103899               | 3.545324  | -1.285641 |

|    |    |   |           |           |           |
|----|----|---|-----------|-----------|-----------|
| 19 | 6  | 0 | -4.904260 | -3.235518 | -0.349576 |
| 20 | 6  | 0 | -6.038650 | -2.550253 | 0.101804  |
| 21 | 6  | 0 | -6.077832 | -1.238469 | 0.634579  |
| 22 | 1  | 0 | -5.018154 | -4.257644 | -0.699641 |
| 23 | 1  | 0 | -7.005272 | -3.047052 | 0.002350  |
| 24 | 6  | 0 | -7.105420 | -0.291060 | 0.836213  |
| 25 | 6  | 0 | -6.940920 | 1.083189  | 1.065011  |
| 26 | 6  | 0 | -5.699517 | 1.797196  | 0.828210  |
| 27 | 1  | 0 | -8.124620 | -0.674280 | 0.762522  |
| 28 | 1  | 0 | -7.828155 | 1.683484  | 1.247046  |
| 29 | 6  | 0 | -4.478261 | 3.867407  | 0.286012  |
| 30 | 1  | 0 | -4.460811 | 4.952397  | 0.201607  |
| 31 | 6  | 0 | -5.650134 | 3.225868  | 0.662360  |
| 32 | 1  | 0 | -6.559025 | 3.798556  | 0.834621  |
| 33 | 7  | 0 | -1.487410 | -2.507088 | -1.787303 |
| 34 | 16 | 0 | -4.396831 | -0.614350 | 1.197758  |
| 35 | 16 | 0 | 1.303989  | -1.407908 | -2.601657 |
| 36 | 8  | 0 | 2.396576  | -0.164874 | -2.767025 |
| 37 | 8  | 0 | 1.809743  | -2.422732 | -1.250590 |
| 38 | 1  | 0 | 1.944106  | -1.882067 | -0.357036 |
| 39 | 6  | 0 | 3.935560  | 0.626631  | 0.097634  |
| 40 | 6  | 0 | 3.769164  | -0.719108 | 0.836691  |
| 41 | 8  | 0 | 2.342685  | -1.048915 | 0.807173  |
| 42 | 1  | 0 | 3.528467  | 1.459617  | 0.669352  |
| 43 | 1  | 0 | 3.502678  | 0.549546  | -0.903915 |
| 44 | 1  | 0 | 4.250220  | -1.509557 | 0.248929  |
| 45 | 6  | 0 | 4.343132  | -0.714156 | 2.254860  |
| 46 | 1  | 0 | 3.694443  | -0.180130 | 2.945024  |
| 47 | 1  | 0 | 5.365186  | -0.335411 | 2.269841  |
| 48 | 17 | 0 | 4.488402  | -2.482218 | 2.933919  |
| 49 | 53 | 0 | 6.070078  | 1.167650  | -0.289558 |
| 50 | 6  | 0 | 1.280130  | -0.190836 | 1.622179  |
| 51 | 8  | 0 | 0.140363  | -0.657735 | 1.422806  |
| 52 | 8  | 0 | 1.798839  | 0.761866  | 2.262339  |

---

**Fig. S64** The optimized geometry, energy, thermal corrections, and Cartesian coordinates of Int<sub>3</sub> at B3LYP level of theory using lanl2dz basis set.

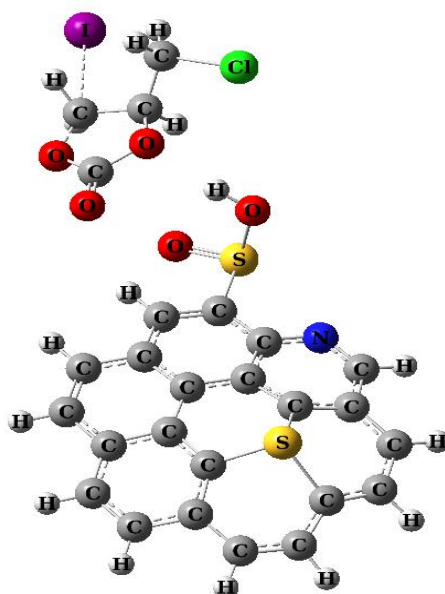

TS<sub>3</sub>

**E = -1477.518657 au**

Zero-point correction = 0.363353 (Hartree/Particle)  
 Thermal correction to Energy = 0.393531  
 Thermal correction to Enthalpy = 0.394475  
 Thermal correction to Gibbs Free Energy = 0.296392

---

| Center Number | Atomic Number | Atomic Type | Coordinates (Angstroms) |           |           |
|---------------|---------------|-------------|-------------------------|-----------|-----------|
|               |               |             | X                       | Y         | Z         |
| 1             | 6             | 0           | -2.455552               | -2.972191 | -1.732239 |
| 2             | 6             | 0           | -3.461110               | -2.576101 | -0.778170 |
| 3             | 6             | 0           | -3.254927               | -1.292199 | -0.252826 |
| 4             | 6             | 0           | -2.311834               | -0.366024 | -0.727459 |
| 5             | 6             | 0           | -1.336005               | -0.917398 | -1.623636 |
| 6             | 6             | 0           | -2.334685               | 1.051379  | -0.442802 |
| 7             | 6             | 0           | -3.480880               | 1.673680  | 0.188537  |
| 8             | 6             | 0           | -4.546934               | 0.955706  | 0.779250  |
| 9             | 6             | 0           | -3.616745               | 3.104141  | 0.165497  |
| 10            | 6             | 0           | -2.530657               | 3.894512  | -0.336236 |
| 11            | 6             | 0           | -1.401842               | 3.298111  | -0.865757 |
| 12            | 6             | 0           | -1.306049               | 1.869929  | -0.978681 |
| 13            | 6             | 0           | -0.222427               | 1.266588  | -1.701391 |
| 14            | 6             | 0           | -0.248815               | -0.072830 | -2.005999 |
| 15            | 1             | 0           | 0.629324                | 1.856233  | -2.037564 |
| 16            | 1             | 0           | -2.518766               | -3.958270 | -2.189353 |
| 17            | 1             | 0           | -2.617989               | 4.978526  | -0.305261 |
| 18            | 1             | 0           | -0.585379               | 3.904266  | -1.250144 |
| 19            | 6             | 0           | -4.642626               | -3.365529 | -0.490454 |
| 20            | 6             | 0           | -5.796766               | -2.828337 | 0.092280  |

---

|    |    |   |           |           |           |
|----|----|---|-----------|-----------|-----------|
| 21 | 6  | 0 | -5.916038 | -1.565918 | 0.723221  |
| 22 | 1  | 0 | -4.686883 | -4.367857 | -0.907016 |
| 23 | 1  | 0 | -6.717392 | -3.410678 | 0.026369  |
| 24 | 6  | 0 | -7.010225 | -0.742696 | 1.068425  |
| 25 | 6  | 0 | -6.959112 | 0.622648  | 1.386400  |
| 26 | 6  | 0 | -5.813156 | 1.470550  | 1.112985  |
| 27 | 1  | 0 | -7.991100 | -1.220244 | 1.039229  |
| 28 | 1  | 0 | -7.881811 | 1.118011  | 1.675998  |
| 29 | 6  | 0 | -4.840557 | 3.683781  | 0.634783  |
| 30 | 1  | 0 | -4.933107 | 4.768204  | 0.627732  |
| 31 | 6  | 0 | -5.912731 | 2.904851  | 1.047023  |
| 32 | 1  | 0 | -6.855634 | 3.371151  | 1.324913  |
| 33 | 7  | 0 | -1.426697 | -2.207346 | -2.099481 |
| 34 | 16 | 0 | -4.262765 | -0.818335 | 1.213070  |
| 35 | 16 | 0 | 1.212662  | -0.780049 | -2.975884 |
| 36 | 8  | 0 | 2.205661  | 0.545559  | -3.011302 |
| 37 | 8  | 0 | 1.871913  | -1.935502 | -1.798638 |
| 38 | 1  | 0 | 1.937611  | -1.565322 | -0.847034 |
| 39 | 6  | 0 | 4.006148  | 0.837887  | 0.658154  |
| 40 | 6  | 0 | 3.710535  | -0.645345 | 0.923957  |
| 41 | 8  | 0 | 2.291256  | -0.921712 | 0.663071  |
| 42 | 1  | 0 | 4.240275  | -1.257080 | 0.189801  |
| 43 | 6  | 0 | 4.110155  | -1.040929 | 2.344680  |
| 44 | 1  | 0 | 3.399284  | -0.667457 | 3.081724  |
| 45 | 1  | 0 | 5.129144  | -0.721341 | 2.566175  |
| 46 | 17 | 0 | 4.136272  | -2.917712 | 2.561220  |
| 47 | 53 | 0 | 6.420809  | 0.915554  | 0.043273  |
| 48 | 6  | 0 | 1.324059  | 0.023164  | 1.268320  |
| 49 | 8  | 0 | 0.196142  | -0.496322 | 1.403697  |
| 50 | 8  | 0 | 1.829369  | 1.171332  | 1.514750  |
| 51 | 1  | 0 | 3.754826  | 1.224339  | -0.318472 |
| 52 | 1  | 0 | 4.204552  | 1.514428  | 1.470311  |

-----

**Fig. S65** The optimized geometry, energy, thermal corrections, and Cartesian coordinates of TS<sub>3</sub> at B3LYP level of theory using lanl2dz basis set.

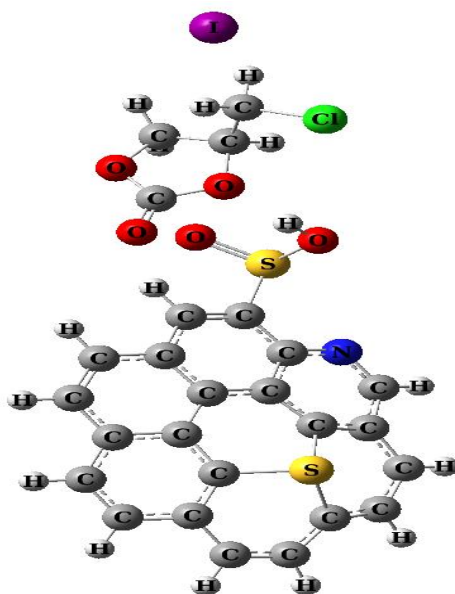

**NSC-773 catalyst + ECH carbonate + I<sup>-</sup> (FC)**

**E = -1477.529585 au**

Zero-point correction = 0.363714 (Hartree/Particle)  
 Thermal correction to Energy = 0.394589  
 Thermal correction to Enthalpy = 0.395533  
 Thermal correction to Gibbs Free Energy = 0.294726

---

| Center Number | Atomic Number | Atomic Type | Coordinates (Angstroms) |           |           |
|---------------|---------------|-------------|-------------------------|-----------|-----------|
|               |               |             | X                       | Y         | Z         |
| 1             | 6             | 0           | -3.029693               | -3.395518 | -0.537567 |
| 2             | 6             | 0           | -4.302097               | -2.857396 | -0.118009 |
| 3             | 6             | 0           | -4.243695               | -1.495342 | 0.219744  |
| 4             | 6             | 0           | -3.157540               | -0.640503 | -0.046206 |
| 5             | 6             | 0           | -1.950718               | -1.313662 | -0.444366 |
| 6             | 6             | 0           | -3.219704               | 0.805017  | -0.020077 |
| 7             | 6             | 0           | -4.489393               | 1.504202  | 0.056150  |
| 8             | 6             | 0           | -5.727257               | 0.874277  | 0.319876  |
| 9             | 6             | 0           | -4.545018               | 2.908755  | -0.243831 |
| 10            | 6             | 0           | -3.317373               | 3.626499  | -0.436204 |
| 11            | 6             | 0           | -2.100376               | 2.971892  | -0.440592 |
| 12            | 6             | 0           | -2.037474               | 1.542445  | -0.307207 |
| 13            | 6             | 0           | -0.806024               | 0.854068  | -0.565439 |
| 14            | 6             | 0           | -0.781343               | -0.518867 | -0.645579 |
| 15            | 1             | 0           | 0.100834                | 1.422603  | -0.749586 |
| 16            | 1             | 0           | -2.956760               | -4.454684 | -0.777941 |
| 17            | 1             | 0           | -3.363109               | 4.700415  | -0.602229 |
| 18            | 1             | 0           | -1.172268               | 3.514149  | -0.597194 |
| 19            | 6             | 0           | -5.537816               | -3.608539 | -0.157312 |
| 20            | 6             | 0           | -6.802761               | -3.002180 | -0.149738 |

---

|    |    |   |           |           |           |
|----|----|---|-----------|-----------|-----------|
| 21 | 6  | 0 | -7.095045 | -1.657397 | 0.171798  |
| 22 | 1  | 0 | -5.471684 | -4.667760 | -0.388025 |
| 23 | 1  | 0 | -7.655048 | -3.606468 | -0.464176 |
| 24 | 6  | 0 | -8.198915 | -0.803382 | -0.054164 |
| 25 | 6  | 0 | -8.204821 | 0.595218  | 0.031915  |
| 26 | 6  | 0 | -7.004210 | 1.410879  | 0.073803  |
| 27 | 1  | 0 | -9.121646 | -1.295683 | -0.364626 |
| 28 | 1  | 0 | -9.145849 | 1.113688  | -0.128572 |
| 29 | 6  | 0 | -5.829632 | 3.534173  | -0.354683 |
| 30 | 1  | 0 | -5.866786 | 4.600114  | -0.569390 |
| 31 | 6  | 0 | -7.011036 | 2.812599  | -0.250615 |
| 32 | 1  | 0 | -7.968218 | 3.300273  | -0.420975 |
| 33 | 7  | 0 | -1.911486 | -2.678961 | -0.649126 |
| 34 | 16 | 0 | -5.702619 | -0.799459 | 1.102858  |
| 35 | 16 | 0 | 0.849235  | -1.377358 | -1.046445 |
| 36 | 8  | 0 | 1.733924  | -0.124985 | -1.663281 |
| 37 | 8  | 0 | 1.414701  | -1.599480 | 0.658840  |
| 38 | 1  | 0 | 1.914531  | -0.775313 | 0.949336  |
| 39 | 6  | 0 | 4.760113  | 1.116813  | -0.616556 |
| 40 | 6  | 0 | 4.479430  | 0.227952  | 0.622881  |
| 41 | 8  | 0 | 3.070441  | 0.621039  | 0.974423  |
| 42 | 1  | 0 | 5.764872  | 1.534092  | -0.641329 |
| 43 | 1  | 0 | 4.527859  | 0.603760  | -1.549600 |
| 44 | 1  | 0 | 4.463539  | -0.832111 | 0.373036  |
| 45 | 6  | 0 | 5.419976  | 0.508566  | 1.783460  |
| 46 | 1  | 0 | 5.410579  | 1.556375  | 2.090911  |
| 47 | 1  | 0 | 6.426854  | 0.172808  | 1.513617  |
| 48 | 17 | 0 | 4.910716  | -0.475194 | 3.314058  |
| 49 | 53 | 0 | 8.114731  | -0.394345 | -0.761911 |
| 50 | 6  | 0 | 2.746289  | 1.838424  | 0.355667  |
| 51 | 8  | 0 | 1.698176  | 2.447210  | 0.555403  |
| 52 | 8  | 0 | 3.770347  | 2.236240  | -0.459459 |

---

**Fig. S66** The optimized geometry, energy, thermal corrections, and Cartesian coordinates of NSC-773 catalyst + ECH carbonate + I<sup>-</sup> (FC) at B3LYP level of theory using lanl2dz basis set.



## Section S14: References

- [1] J. Xu, Y. L. Gan, P. Hu, H. Zheng and B. Xue, *Catal. Sci. Technol.*, 2018, **8**, 5582-5593.
- [2] R. He, D. Zhang, G. Xu, C. Li and J. Bai, *Inorg. Chem. Front.*, 2020,**7**, 2783-2790.
- [3] D. Kim, D. W. Kim, O. Buyukcakir, M. K. Kim, K. Polychronopoulou and A. Coskun, *Adv. Funct. Mater.*, 2017, **27**, 1700706.
- [4] J. Xu, J. K. Shang, Q. Jiang, Y. Wang and Y. X. Li, *RSC Adv.*, 2016, **6**, 55382-55392.
- [5] S. Baj, T. Krawczyk, K. Jasiak, A. Siewniak and M. Pawlyta, *Appl. Catal. A: Gen.*, 2014, **488**, 96-102.
- [6] S. Jayakumar, H. Li, J. Chen and Q. Yang, *ACS Appl. Mater. Interfaces*, 2018, **10**, 2546-2555.
- [7] D. H. Lan, L. Chen, C. T. Au and S. F. Yin, *Carbon*, 2015, **93**, 22-31.
- [8] D. H. Lan, Y. X. Gong, N. Y. Tan, S. S. Wu, J. Shen, K. C. Yao, B. Yi, C. T. Au and S. F. Yin, *Carbon*, 2018, **127**, 245-254.
- [9] Q. Su, J. Sun, J. Wang, Z. Yang, W. Cheng and S. Zhang, *Catal. Sci. Technol.*, 2014, **4**, 1556-1562.
- [10] J. Xu, M. Xu, J. Wu, H. Wu, W. H. Zhang and Y. X. Li, *RSC adv.*, 2015, **5**,72361-72368.
- [11] T. Zhang, X. Wang, X. Huang, Y. Liao and J. Chen, *RSC adv.*, 2016, **6**, 2810-2818.
- [12] Y. B. Sun, C. Y. Cao, S. L. Yang, P. P. Huang, C. R. Wang and W. G. Song, *Chem. Commun.*, 2014, **50**, 10307-10310.
- [13] V. B. Saptal, T. Sasaki, K. Harada, D. Nishio-Hamane and B. M. Bhanage, *ChemSusChem*, 2016, **9**, 644-650.
